# Supplementary material for: Copper(i)/DM-SEGPHOS-catalyzed enantio- and diastereoselective conjugate boration to α-alkylidene-γ-lactams
Source: Royal Society of Chemistry journal article supplement (doi:10.1039/c9qo01504c), 2020-01-01

# **Copper(I)/DM-SEGPPOS-Catalyzed Enantio- and Diastereoselective Conjugate Boration to $\alpha$ -Alkylidene- $\gamma$ -lactams**

Jimil George, Hun Young Kim\* and Kyungsoo Oh\*

Center for Metareceptome Research, College of Pharmacy, Chung-Ang University

84 Heukseok-ro, Dongjak, Seoul, 156-756, Republic of Korea

Email: [kyungsooh@cau.ac.kr](mailto:kyungsooh@cau.ac.kr)

## **Table of Contents**

|                                                                                               |            |
|-----------------------------------------------------------------------------------------------|------------|
| <b>General Methods</b>                                                                        | <b>S2</b>  |
| <b>Preparation of Starting Materials</b>                                                      | <b>S2</b>  |
| <b>Procedure D for Catalytic Asymmetric Boronate Conjugate Addition to Alkylidene Lactams</b> | <b>S13</b> |
| <b>Procedure E for Oxidation of Boronate Adducts to Alcohols</b>                              | <b>S14</b> |
| <b>Characterization Data for the Compounds in Scheme 3</b>                                    | <b>S15</b> |
| <b>References</b>                                                                             | <b>S29</b> |
| <b>Control Experiment with Isopropanol-D<sub>8</sub></b>                                      | <b>S30</b> |
| <b>X-Ray Analysis of the Compound 3k</b>                                                      | <b>S31</b> |
| <b>HPLC Traces of Enantioenriched Compounds</b>                                               | <b>S33</b> |
| <b>Copies of <sup>1</sup>H NMR and <sup>13</sup>C NMR Spectra</b>                             | <b>S54</b> |

## General Methods.

All reactions were carried out using oven-dried glassware. The progress of all reactions was monitored by thin-layer chromatography on Dynamic Adsorbent, Inc. precoated silica gel plates (250  $\mu\text{m}$ ) and visualized by ultra-violet light or by staining with  $\text{KMnO}_4$ . Unless otherwise specified, all chemicals were purchased from Sigma Aldrich or Alfa Aesar or TCI chemicals and all solvents were purchased from Fischer Scientific. HPLC grade toluene and THF were further dried through alumina columns. The  $^1\text{H}$  NMR and  $^{13}\text{C}$  NMR spectra were obtained on JEOL600 MHz Fourier Transform spectrometers. Chemical Shifts are reported in units of parts per million downfield from tetramethylsilane as standard. The coupling constants are reported in Hertz. The infrared spectra were obtained using a Thermo Nicolet IR 300 Spectrometer. Silica gel (32-64 $\mu$ , Merck KGaA) was used for column chromatography. Melting points were recorded on a Buchi-B-450 melting point apparatus and the melting point values were uncorrected. The absolute configuration of compound **3k** was determined by the single crystal X-ray analysis, and the relative configurations of other compounds were determined accordingly. The enantiomeric excess of chiral compounds was determined by the HPLC analysis on chiral stationary phase.

## Preparation of Starting Materials

$\alpha$ -Alkylidene- $\gamma$ -lactams were synthesized from the corresponding 2-pyrrolidinone or 2-piperidinone according to the literature procedures.<sup>1-2</sup> Some new derivatives were synthesized by the Procedure C below and characterized.

### A. The Synthesis of Compounds 5

A solution of lactam (20 mmol) in anhydrous toluene (20 mL) was cooled to 0  $^\circ\text{C}$  and stirred for 10 min at this temperature. Trifluoroacetic anhydride (22 mmol) was then added dropwise. After 10 min, the cooling bath was removed, and the reaction was warmed to room temperature and continued to stir for 1 h. After which, all volatiles were removed under reduced pressure and the residue was co-evaporated with toluene

(3x10 mL) to provide the trifluoro acetyl 2-pyrrolidine as pale-yellow oil in quantitative yield. This compound was used in next step without further purification.

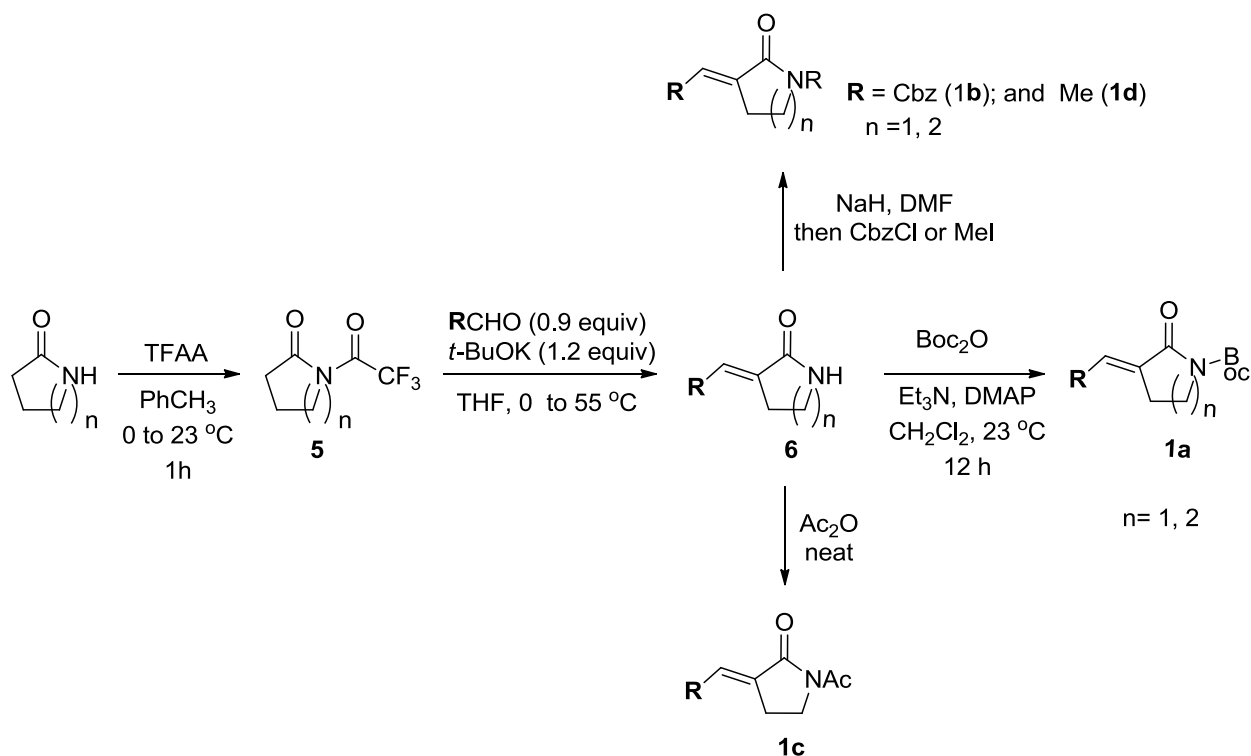

### B. Procedure A for the Synthesis of Alkylidene Lactam **6**<sup>1</sup>

An oven dried round bottom flask equipped with a magnetic stirrer under argon was charged with potassium *tert*-butoxide (740 mg, 6.5 mmol, 1.3 equiv) in anhydrous THF (7 mL). This solution was cooled to 0 °C. After stirring for 10 min, a mixture of aldehyde (5.0 mmol) and trifluoroacetyl lactam **5** (0.9 g, 5 mmol) was added dropwise and further stirred for 10 min. The reaction temperature was then changed to 55 °C and remained at this temperature for 1 h. The solvent was removed under reduced pressure after cooling down the reaction mixture to room temperature. The residue was suspended in water (20 mL) and extracted with ethyl acetate (3x20 mL). Organic layers were combined and washed with brine, dried and concentrated. The residue obtained was washed with 5% ethyl acetate in hexanes to remove unreacted aldehydes to get the pure product. This compound was directly employed in the next step for the Boc, Cbz, Ac and Me protections.

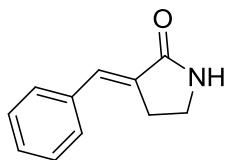

(*E*)-3-Benzylidenepyrrrolidin-2-one (**6**): 0.7g (80%); white solid; m.p. 164-165 °C. <sup>1</sup>H

NMR (CDCl<sub>3</sub>, 600 MHz): δ 7.49 (d, *J* = 7.2 Hz, 2H), 7.41 (dd, *J* = 6.6, 7.8 Hz, 2H),

7.37-7.30 (m, 3H), 3.56 (t, *J* = 6.0 Hz, 2H), 3.16 (dt, *J* = 2.4, 6.0 Hz, 2H); <sup>13</sup>C NMR

(CDCl<sub>3</sub>, 150 MHz): δ 172.7, 135.6, 130.3, 130.2, 129.5, 128.6, 128.5, 39.6, 26.3; IR (neat): 3206, 3086,

2918, 1756, 1724, 1710, 1636, 1383, 1366, 1318, 1284, 1256, 1157 cm<sup>-1</sup>; HRMS (ESI): m/z calcd for

C<sub>11</sub>H<sub>11</sub>NNaO [M+Na]<sup>+</sup> 196.0733; Found 196.0737.

### C. Procedure B for Boc Protection of Alkylidene Lactams<sup>1</sup>

To a solution of compound **6** (5 mmol/20 mL of dry DCM) was added DMAP (60 mg, 0.1 equiv) and triethylamine (1.1 mL, 1.5 equiv) at room temperature under argon. (Boc)<sub>2</sub>O (2.3 mL, 2.0 equiv) was added and the solution was continued to stir for 6-8 h. After the reaction was complete, all volatiles were removed *in vacuo*, and the residue was purified by column chromatography on silica gel to provide the corresponding alkylidene lactams.

### D. Procedure C for Cbz Protection of Alkylidene Lactams

A solution of compound **6** (5 mmol) in dry DMF (20 mL) under argon was cooled to 0 °C. NaH (220 mg, 1.1 equiv, 60% suspension in mineral oil) was added portionwise to this solution. After 15 min, CbzCl (0.72 mL, 5 mmol) was added dropwise at this temperature. The reaction mixture was slowly warmed to room temperature and stirred for 6 h. The reaction was quenched by the dropwise addition of ice-cold water (25 mL) at 0 °C, and the aqueous layer was extracted with ethyl acetate (2x25 mL). The combined organic layers were washed with ice cold water (4x25 mL) and brine (25 mL), and then dried over sodium sulfate, filtered and concentrated. The residue was purified by column chromatography on silica gel using 50-100% CH<sub>2</sub>Cl<sub>2</sub> in hexanes as eluent.

### E. Characterization Data for Starting Materials



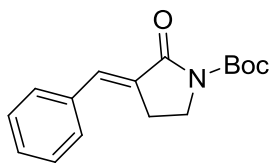

(*E*)-*tert*-Butyl 3-benzylidene-2-oxopyrrolidine-1-carboxylate (**1a**): This compound was prepared from benzaldehyde (0.53 g, 5.0 mmol) according to the Procedure A followed by the Procedure B. The compound was purified by column chromatography on silica gel using (10-15%) ethyl acetate in hexanes as eluent. 0.91g (67%); white solid; m.p. 131-132 °C; <sup>1</sup>H NMR (CDCl<sub>3</sub>, 600 MHz): δ 7.53 (t, *J* = 3.0 Hz, 1H), 7.49 (d, *J* = 7.8 Hz, 2H), 7.42 (dd, *J* = 7.2, 7.8 Hz, 2H), 7.36 (t, *J* = 7.2 Hz, 1H), 3.84 (dd, *J* = 6.6, 7.8 Hz, 2H), 3.05 (td, *J* = 7.8, 3.0 Hz, 2H), 1.57 (s, 9H); <sup>13</sup>C NMR (CDCl<sub>3</sub>, 150 MHz): δ 167.7, 150.8, 135.1, 134.1, 130.0, 129.9, 129.2, 128.7, 82.9, 43.3, 28.0, 23.3; IR (neat): 2978, 2916, 1773, 1712, 1649, 1365, 1312, 1153 cm<sup>-1</sup>; HRMS (ESI): *m/z* calcd for C<sub>16</sub>H<sub>19</sub>NNaO<sub>3</sub> [M+Na]<sup>+</sup> 296.1257; Found 296.1261.

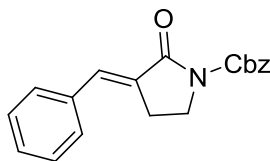

(*E*)-Benzyl 3-benzylidene-2-oxopyrrolidine-1-carboxylate (**1b**): This compound was prepared from benzaldehyde (0.53 g, 5.0 mmol) according to the Procedure A followed by the Procedure C. The compound was purified by column chromatography on silica gel using (50-100 %) CH<sub>2</sub>Cl<sub>2</sub> in hexanes as eluent. 820 mg (54%); white solid; m.p. 134-136 °C; <sup>1</sup>H NMR (CDCl<sub>3</sub>, 600 MHz): δ 7.55 (t, *J* = 3.0 Hz, 1H), 7.51-7.45 (m, 4H), 7.44-7.40 (m, 2H), 7.39-7.36 (m, 3H), 7.32 (m, 1H), 5.33 (s, 2H), 3.89 (t, *J* = 7.2 Hz, 2H), 3.07 (td, *J* = 7.2, 3.0 Hz, 2H); <sup>13</sup>C NMR (CDCl<sub>3</sub>, 150 MHz): δ 167.5, 152.1, 135.3, 134.9, 134.8, 130.0, 129.4, 129.2, 128.8, 128.5, 128.3, 128.0, 68.0, 43.2, 23.4; IR (neat): 2916, 1774, 1713, 1648, 1383, 1298, 1273 cm<sup>-1</sup>; HRMS (ESI): *m/z* calcd for C<sub>19</sub>H<sub>17</sub>NNaO<sub>3</sub> [M+Na]<sup>+</sup> 330.1101; Found 330.1109.

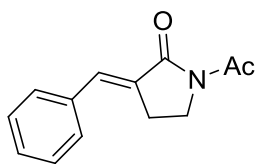

(*E*)-1-Acetyl-3-benzylidenepyrrolidin-2-one (**1c**): This compound was prepared by refluxing the compound **6** (865 mg, 5 mmol) in acetic anhydride (5 mL) for 12 h. After the reaction was complete by TLC, the reaction mixture was cool down to room temperature and all volatiles were removed *in vacuo*. The residue was purified by column chromatography on silica gel using 10-15% ethyl acetate in hexanes as eluent to obtain the pure product. 0.75g (70%); white solid; m.p. 192-194 °C; <sup>1</sup>H NMR (CDCl<sub>3</sub>, 600 MHz): δ 7.56 (t, *J* = 3.0 Hz, 1H), 7.52 (d, *J* = 7.2 Hz, 2H), 7.44 (dd, *J* = 7.2, 7.8 Hz, 2H), 7.39 (m, 1H), 3.89 (t, *J* = 7.2 Hz, 2H), 3.08 (dt, *J* = 3.0,

7.2 Hz, 2H), 2.63 (s, 3H);  $^{13}\text{C}$  NMR ( $\text{CDCl}_3$ , 150 MHz):  $\delta$  171.9, 168.8, 135.1, 134.8, 130.2, 130.1, 129.5, 128.8, 42.2, 25.0, 23.0; IR (neat): 2926, 2845, 1708, 1688, 1485, 1380, 1368, 1256  $\text{cm}^{-1}$ ; HRMS (FAB): HRMS (ESI):  $m/z$  calcd  $\text{C}_{13}\text{H}_{14}\text{NO}_2$   $[\text{M}+\text{H}]^+$  216.1019; Found 216.1023.

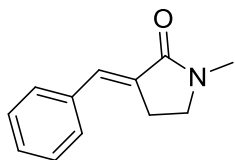

(*E*)-3-Benzylidene-1-methylpyrrolidin-2-one (**1d**): A solution of the compound **6** (865 mg, 5 mmol) in dry DMF (20 mL) under argon was cooled to 0 °C. NaH (220 mg, 1.1 equiv, 60% suspension in mineral oil) was added portionwise and continued

to stir for 15 min. Iodomethane (0.47 mL, 1.5 equiv) was then added and the reaction mixture was warmed to room temperature and allowed to stir for 6 h. After the completion of reaction (by TLC analysis), the reaction was cooled to 0 °C and quenched by the dropwise addition of ice-cold water (25 mL). The aqueous layer was extracted with ethyl acetate (2x25 mL). The organic layers were combined, washed with ice-cold water (4x25 mL) and brine (25 mL). After drying over sodium sulfate, the organic layer was filtered and concentrated. The residue was purified by column chromatography on silica gel using 10-20% ethyl acetate in hexanes as eluent. 440 mg (56%); white solid; m.p. 134-136 °C;  $^1\text{H}$  NMR ( $\text{CDCl}_3$ , 600 MHz):  $\delta$  7.87 (t,  $J = 7.8$  Hz, 2H), 7.40 (dd,  $J = 7.2, 7.8$  Hz, 2H), 7.36-7.30 (m, 2H), 3.50 (t,  $J = 6.6$  Hz, 2H), 3.07 (td,  $J = 6.6, 2.4$  Hz, 2H), 3.01 (s, 3H);  $^{13}\text{C}$  NMR ( $\text{CDCl}_3$ , 150 MHz):  $\delta$  169.2, 135.8, 130.7, 129.6, 129.4, 128.6, 128.2, 46.7, 30.2, 24.3; IR (neat): 3047, 2940, 2885, 1673, 1655, 1645, 1448, 1384, 1290  $\text{cm}^{-1}$ ; HRMS (ESI):  $m/z$  calcd for  $\text{C}_{12}\text{H}_{14}\text{NO}$   $[\text{M}+\text{H}]^+$  188.1070; Found 188.1072.

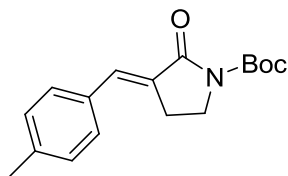

(*E*)-*tert*-Butyl 3-(4-methylbenzylidene)-2-oxopyrrolidine-1-carboxylate (**1e**):

This compound was prepared from *p*-tolualdehyde (0.60 g, 5.0 mmol) according to the Procedure A followed by the Procedure B. The compound was purified by column chromatography on silica gel using 10-15% ethyl acetate in hexanes as eluent. 617mg (43%); white solid; m.p. 159-161 °C;  $^1\text{H}$  NMR ( $\text{CDCl}_3$ , 600 MHz):  $\delta$  7.50 (t,  $J = 3.0$  Hz, 1H), 7.39 (d,  $J = 7.8$  Hz, 2H), 7.23 (dd,  $J = 7.8$  Hz, 2H), 3.82 (dd,  $J = 6.6, 7.8$  Hz, 2H), 3.02 (td,  $J = 7.8, 3.0$  Hz, 2H), 2.38 (s, 3H), 1.56 (s, 9H);  $^{13}\text{C}$  NMR ( $\text{CDCl}_3$ , 150 MHz):  $\delta$  167.8, 150.9, 139.6, 134.1, 132.3, 130.0, 129.5, 128.8, 82.8, 43.3,

28.0, 23.3, 21.4; IR (neat): 2979, 2918, 1756, 1724, 1710, 1636, 1383, 1366, 1318, 1284, 1256, 1157  $\text{cm}^{-1}$ ; HRMS (ESI):  $m/z$  calcd for  $\text{C}_{17}\text{H}_{21}\text{NNaO}_3$   $[\text{M}+\text{Na}]^+$  310.1414; Found 310.1409.

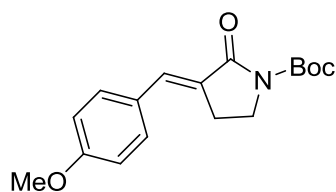

(*E*)-*tert*-Butyl 3-(4-methoxybenzylidene)-2-oxopyrrolidine-1-carboxylate

(**1f**). This compound was prepared from *p*-anisaldehyde (0.68 g, 5.0 mmol)

according to the Procedure A followed by the Procedure B. The compound

was purified by column chromatography on silica gel using 10-15% ethyl acetate in hexanes as eluent. 575 mg (38%); white solid; m.p. 145-146  $^{\circ}\text{C}$ ;  $^1\text{H}$  NMR ( $\text{CDCl}_3$ , 600 MHz):  $\delta$  7.49 (t,  $J$  = 3.0 Hz, 1H), 7.46 (d,  $J$  = 9.0 Hz, 2H), 6.96 (d,  $J$  = 9.0 Hz, 2H), 3.85 (s, 3H), 3.83 (t,  $J$  = 7.8 Hz, 2H), 3.03 (td,  $J$  = 7.8, 3.0 Hz, 2H), 1.57 (s, 9H);  $^{13}\text{C}$  NMR ( $\text{CDCl}_3$ , 150 MHz):  $\delta$  168.0, 160.3, 150.9, 133.8, 131.7, 127.9, 127.1, 114.2, 82.7, 55.3, 43.2, 28.0, 23.2; IR (neat): 2979, 2933, 1769, 1600, 1514, 1360, 1293, 1280, 1176, 1021  $\text{cm}^{-1}$ ; HRMS (ESI):  $m/z$  calcd for  $\text{C}_{17}\text{H}_{21}\text{NNaO}_4$   $[\text{M}+\text{Na}]^+$  326.1363; Found 326.1363.

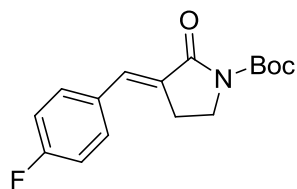

(*E*)-*tert*-Butyl 3-(4-fluorobenzylidene)-2-oxopyrrolidine-1-carboxylate (**1g**):

This compound was prepared from 4-fluorobenzaldehyde (0.62 g, 5.0 mmol)

according to the Procedure A followed by the Procedure B. The compound was

purified by column chromatography on silica gel using 10-15% ethyl acetate in hexanes as eluent. 814 mg (56%); white solid; m.p. 184-186  $^{\circ}\text{C}$ ;  $^1\text{H}$  NMR ( $\text{CDCl}_3$ , 600 MHz):  $\delta$  7.50-7.46 (m, 3H), 7.11 (t,  $J$  = 7.2 Hz, 2H), 3.84 (t,  $J$  = 7.2 Hz, 2H), 3.01 (td,  $J$  = 7.2, 3.0 Hz, 2H), 1.57 (s, 9H);  $^{13}\text{C}$  NMR ( $\text{CDCl}_3$ , 150 MHz):  $\delta$  167.5, 163.7 (d,  $J$  = 248.4), 150.7, 132.8, 131.9 (d,  $J$  = 8.5 Hz), 131.3 (d,  $J$  = 3.0 Hz), 129.5, 116.0 (d,  $J$  = 21.4 Hz), 82.9, 43.2, 28.0, 23.2; IR (neat): 2979, 2918, 1762, 1646, 1510, 1367, 1257, 1229, 1160  $\text{cm}^{-1}$ ; HRMS (ESI):  $m/z$  calcd for  $\text{C}_{16}\text{H}_{18}\text{FNNaO}_3$   $[\text{M}+\text{Na}]^+$  314.1163; Found 314.1161.

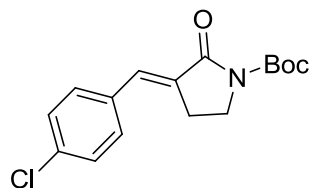

(*E*)-*tert*-Butyl 3-(4-chlorobenzylidene)-2-oxopyrrolidine-1-carboxylate (**1h**):

This compound was prepared from 4-chloro benzaldehyde (0.70 g, 5.0 mmol)

according to the Procedure A followed by the Procedure B. The compound was

purified by column chromatography on silica gel using 10-15% ethyl acetate in hexanes as eluent. 720 mg

(47%); white solid; m.p. 188-190 °C; <sup>1</sup>H NMR (CDCl<sub>3</sub>, 600 MHz): δ 7.47 (t, *J* = 3.0 Hz, 1H), 7.41 (d, *J* = 8.4 Hz, 2H), 7.39 (d, *J* = 8.4 Hz, 2H), 3.85 (t, *J* = 7.2 Hz, 2H), 3.04-2.98 (m, 2H), 1.57 (s, 9H); <sup>13</sup>C NMR (CDCl<sub>3</sub>, 150 MHz): δ 167.4, 150.7, 135.2, 133.5, 132.7, 131.1, 130.5, 129.0, 83.0, 43.2, 28.0, 23.3; IR (neat): 2980, 1765, 1727, 1701, 1384, 1367, 1324, 1160 cm<sup>-1</sup>; HRMS (ESI): *m/z* calcd for C<sub>16</sub>H<sub>18</sub>ClNNaO<sub>3</sub> [M+Na]<sup>+</sup> 330.0867; Found 330.0866.

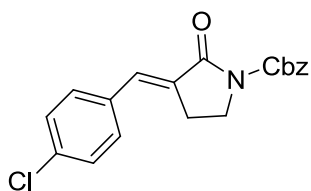

(*E*)-Benzyl 3-(4-chlorobenzylidene)-2-oxopyrrolidine-1-carboxylate (**1i**):

This compound was prepared from 4-chloro benzaldehyde (0.70 g, 5.0 mmol) according to the Procedure A followed by the Procedure C. The compound was purified by column chromatography on silica gel using 50-100% CH<sub>2</sub>Cl<sub>2</sub> in hexanes as eluent. 600 mg (35%); white solid; m.p. 168-169 °C; <sup>1</sup>H NMR (CDCl<sub>3</sub>, 600 MHz): δ 7.50 (t, *J* = 3.0 Hz, 1H), 7.47 (d, *J* = 7.2 Hz, 2H), 7.44-7.37 (m, 6H), 7.34 (m, 1H), 5.34 (s, 2H), 3.91 (dd, *J* = 6.6, 7.8 Hz, 2H), 3.04 (td, *J* = 7.8, 3.0 Hz, 2H); <sup>13</sup>C NMR (CDCl<sub>3</sub>, 150 MHz): δ 167.2, 152.0, 135.4, 135.3, 133.4, 133.3, 131.2, 129.9, 129.1, 128.5, 128.3, 128.1, 68.1, 43.2, 23.4; IR (neat): 2959, 1765, 1640, 1490, 1379, 1295, 1270, 1253, 1094 cm<sup>-1</sup>; HRMS (ESI): *m/z* calcd for C<sub>19</sub>H<sub>16</sub>ClNNaO<sub>3</sub> [M+Na]<sup>+</sup> 364.0711; Found 364.0713.

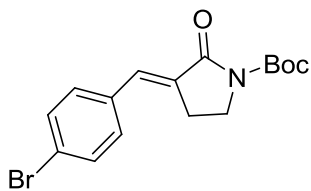

(*E*)-*tert*-Butyl 3-(4-bromobenzylidene)-2-oxopyrrolidine-1-carboxylate (**1j**):

This compound was prepared from 4-bromo benzaldehyde (0.92 g, 5.0 mmol) according to the Procedure A followed by the Procedure B. The compound was purified by column chromatography on silica gel using 10-15% ethyl acetate in hexanes as eluent. 1.0 g (58%); white solid; m.p. 170-171 °C; <sup>1</sup>H NMR (CDCl<sub>3</sub>, 600 MHz): δ 7.55 (d, *J* = 9.0 Hz, 2H), 7.45 (t, *J* = 3.0 Hz, 1H), 7.35 (d, *J* = 9.0 Hz, 2H), 3.84 (dd, *J* = 6.6, 7.8 Hz, 2H), 2.99 (td, *J* = 7.8, 3.0 Hz, 2H), 1.57 (s, 9H); <sup>13</sup>C NMR (CDCl<sub>3</sub>, 150 MHz): δ 167.4, 150.7, 133.9, 132.7, 132.0, 131.3, 130.7, 123.5, 83.0, 43.2, 28.0, 23.3; IR (neat): 2979, 1765, 1728, 1698, 1646, 1367, 1323, 1254, 1159 cm<sup>-1</sup>; HRMS (ESI): *m/z* calcd for C<sub>16</sub>H<sub>18</sub>BrNNaO<sub>3</sub> [M+Na]<sup>+</sup> 374.0362; Found 374.0365.

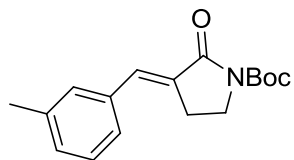

*(E)*-*tert*-Butyl 3-(3-methylbenzylidene)-2-oxopyrrolidine-1-carboxylate (**1k**):

This compound was prepared from 3-methyl benzaldehyde (0.60 g, 5.0 mmol) according to the Procedure A followed by the Procedure B. The compound was purified by column chromatography on silica gel using 10-15% ethyl acetate in hexanes as eluent. 745 mg (52%); white solid; m.p. 124-126 °C; <sup>1</sup>H NMR (CDCl<sub>3</sub>, 600 MHz): δ 7.50 (t, *J* = 3.0 Hz, 1H), 7.34-7.28 (m, 3H), 7.19 (d, *J* = 7.2 Hz, 1H), 3.83 (dd, *J* = 6.6, 7.8 Hz, 2H), 3.05 (td, *J* = 7.8, 3.0 Hz, 2H), 2.93 (s, 3H), 1.57 (s, 9H); <sup>13</sup>C NMR (CDCl<sub>3</sub>, 150 MHz): δ 167.7, 150.8, 138.4, 135.0, 134.3, 130.8, 130.0, 129.6, 128.6, 127.0, 82.8, 43.2, 28.0, 23.3, 21.4; IR (neat): 2979, 2917, 1770, 1732, 1712, 1647, 1365, 1310, 1259, 1154 cm<sup>-1</sup>; HRMS (ESI): *m/z* calcd for C<sub>17</sub>H<sub>21</sub>NNaO<sub>3</sub> [M+Na]<sup>+</sup> 310.1414; Found 310.1419.

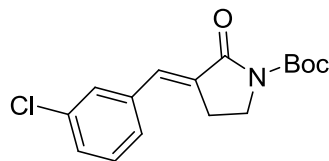

*(E)*-*tert*-Butyl 3-(3-chlorobenzylidene)-2-oxopyrrolidine-1-carboxylate (**1l**):

This compound was prepared from 3-chloro benzaldehyde (0.70 g, 5.0 mmol) according to the Procedure A followed by the Procedure B. The compound was purified by column chromatography on silica gel using 10-15% ethyl acetate in hexanes as eluent. 782 mg (51%); white solid; m.p. 128-129 °C; <sup>1</sup>H NMR (CDCl<sub>3</sub>, 600 MHz): δ 7.47-7.44 (m, 2H), 7.37-7.33 (m, 3H), 3.85 (t, *J* = 7.2 Hz, 2H), 3.04 (td, *J* = 7.2, 2.4 Hz, 2H), 1.57 (s, 9H); <sup>13</sup>C NMR (CDCl<sub>3</sub>, 150 MHz): δ 167.2, 150.7, 136.8, 134.7, 132.5, 131.5, 130.0, 129.4, 129.1, 128.2, 83.1, 43.2, 28.0, 23.3; IR (neat): 2916, 2846, 1776, 1717, 1649, 1384, 1361, 1297, 1275 cm<sup>-1</sup>; HRMS (ESI): *m/z* calcd for C<sub>16</sub>H<sub>18</sub>ClNNaO<sub>3</sub> [M+Na]<sup>+</sup> 330.0867; Found 330.0871.

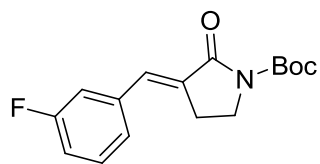

*(E)*-*tert*-Butyl 3-(3-fluorobenzylidene)-2-oxopyrrolidine-1-carboxylate (**1m**):

This compound was prepared from 3-fluoro benzaldehyde (0.62 g, 5.0 mmol) according to the Procedure A followed by the Procedure B. The compound was purified by column chromatography on silica gel using 10-15% ethyl acetate in hexanes as eluent. 873 mg (60%); white solid; m.p. 148-150 °C; <sup>1</sup>H NMR (CDCl<sub>3</sub>, 600 MHz): δ 7.48 (t, *J* = 3.0 Hz, 1H), 7.40 (m, 1H), 7.26 (d, *J* = 7.8 Hz, 1H), 7.18 (d, *J* = 7.2 Hz, 1H), 7.07 (m, 1H), 3.86 (t, *J* = 7.2 Hz, 2H), 3.03 (td, *J* = 7.2, 3.0 Hz, 2H), 1.57 (s, 9H); <sup>13</sup>C NMR (CDCl<sub>3</sub>, 150 MHz): δ 167.3, 163.6 (d, *J* = 244.0), 150.7, 137.2 (d,

$J = 8.5$  Hz), 132.7, (d,  $J = 2.85$  Hz), 131.3, 130.3 (d,  $J = 8.5$  Hz), 126.0, 116.23 (d,  $J = 24.3$  Hz), 116.21 (d,  $J = 21.4$  Hz), 83.1, 43.2, 28.0, 23.2; IR (neat): 2978, 2924, 1763, 1645, 1580, 1367, 1296, 1282, 1156  $\text{cm}^{-1}$ ; HRMS (ESI):  $m/z$  calcd for  $\text{C}_{16}\text{H}_{18}\text{FNNaO}_3$   $[\text{M}+\text{Na}]^+$  314.1163; Found 314.1168.

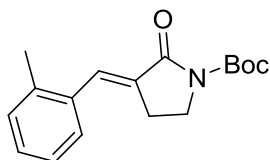

(*E*)-*tert*-Butyl 3-(2-methylbenzylidene)-2-oxopyrrolidine-1-carboxylate (**1n**):

This compound was prepared from 2-methyl benzaldehyde (0.60 g, 5.0 mmol) according to the Procedure A followed by the Procedure B. The compound was purified by column chromatography on silica gel using 10-15% ethyl acetate in hexanes as eluent. 830 mg (58%); white solid; m.p. 86-88 °C;  $^1\text{H}$  NMR ( $\text{CDCl}_3$ , 600 MHz):  $\delta$  7.73 (t,  $J = 3.0$  Hz, 1H), 7.37 (d,  $J = 7.8$  Hz, 1H), 7.28-7.21 (m, 3H), 3.80 (dd,  $J = 6.6, 7.8$  Hz, 2H), 2.98 (td,  $J = 7.8, 3.0$  Hz, 2H), 2.39 (s, 3H), 1.57 (s, 9H);  $^{13}\text{C}$  NMR ( $\text{CDCl}_3$ , 150 MHz):  $\delta$  167.6, 150.8, 138.4, 133.8, 132.0, 130.7, 130.6, 129.0, 128.0, 125.8, 82.9, 43.4, 28.0, 23.2, 19.9; IR (neat): 2978, 2930, 1773, 1731, 1713, 1647, 1366, 1312, 1292, 1249, 1154  $\text{cm}^{-1}$ ; HRMS (ESI):  $m/z$  calcd for  $\text{C}_{17}\text{H}_{21}\text{NNaO}_3$   $[\text{M}+\text{Na}]^+$  310.1414; Found 310.1418.

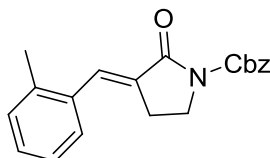

(*E*)-Benzyl 3-(2-methylbenzylidene)-2-oxopyrrolidine-1-carboxylate (**1o**):

This compound was prepared from 2-methyl benzaldehyde (0.60 g, 5.0 mmol) according to the Procedure A followed by the Procedure C. The compound was purified by column chromatography on silica gel using 50-100%  $\text{CH}_2\text{Cl}_2$  in hexanes as eluent. 720 mg (45%); white solid; m.p. 117-119 °C;  $^1\text{H}$  NMR ( $\text{CDCl}_3$ , 600 MHz):  $\delta$  7.57 (t,  $J = 3.0$  Hz, 1H), 7.47 (d,  $J = 7.2$  Hz, 2H), 7.39-7.31 (m, 4H), 7.26-7.20 (m, 3H), 5.33 (s, 2H), 3.85 (t,  $J = 7.2$  Hz, 2H), 2.98 (td,  $J = 7.2, 3.0$  Hz, 2H), 2.39 (s, 3H);  $^{13}\text{C}$  NMR ( $\text{CDCl}_3$ , 150 MHz):  $\delta$  167.4, 152.2, 138.5, 135.3, 133.6, 132.7, 130.6, 130.1, 129.2, 128.5, 128.3, 128.1 (2C), 125.8, 68.1, 43.4, 23.3, 19.9; IR (neat): 3030, 2916, 1777, 1717, 1644, 1484, 1382, 1297, 1278, 1216, 1096  $\text{cm}^{-1}$ ; HRMS (ESI):  $m/z$  calcd for  $\text{C}_{20}\text{H}_{19}\text{NNaO}_3$   $[\text{M}+\text{Na}]^+$  344.1257; Found 344.1259.

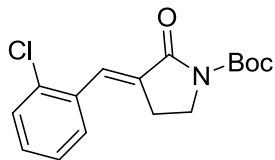

(*E*)-*tert*-Butyl 3-(2-chlorobenzylidene)-2-oxopyrrolidine-1-carboxylate (**1p**):

This compound was prepared from 2-chloro benzaldehyde (0.70 g, 5.0 mmol) according to the Procedure A followed by the Procedure B. The compound was purified by column chromatography on silica gel using 10-15% ethyl acetate in hexanes as eluent. 840 mg (55%); white solid; m.p. 171-175 °C; <sup>1</sup>H NMR (CDCl<sub>3</sub>, 600 MHz): δ 7.85 (t, *J* = 3.0 Hz, 1H), 7.47-7.43 (m, 2H), 7.32-7.28 (m, 2H), 3.81 (dd, *J* = 6.6, 7.8 Hz, 2H), 2.96 (td, *J* = 7.8, 3.0 Hz, 2H), 1.57 (s, 9H); <sup>13</sup>C NMR (CDCl<sub>3</sub>, 150 MHz): δ 167.0, 150.9, 135.4, 133.4, 132.7, 130.5, 130.2, 130.1, 129.4, 126.7, 83.2, 43.4, 28.1, 23.2; IR (neat): 2980, 2932, 1776, 1751, 1716, 1383, 1368, 1312, 1285, 1253, 1153 cm<sup>-1</sup>; HRMS (ESI): *m/z* calcd for C<sub>16</sub>H<sub>18</sub>ClNNaO<sub>3</sub> [M+Na]<sup>+</sup> 330.0867; Found 330.0870.

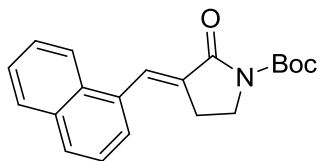

(*E*)-*tert*-Butyl 3-(naphthalen-1-ylmethylene)-2-oxopyrrolidine-1-carboxylate

(**1q**): This compound was prepared from 1-naphthaldehyde (0.78 g, 5.0 mmol) according to the Procedure A followed by the Procedure B. The compound was purified by column chromatography on silica gel using 10-15% ethyl acetate in hexanes as eluent. 516 mg (32%); brownish amorphous solid; <sup>1</sup>H NMR (CDCl<sub>3</sub>, 600 MHz): δ 8.25 (t, *J* = 3.0 Hz, 1H), 8.11 (d, *J* = 8.4 Hz, 1H), 7.88 (dd, *J* = 7.2, 9.0 Hz, 2H), 7.57-7.50 (m, 3H), 7.49 (m, 1H), 3.82 (t, *J* = 6.6 Hz, 2H), 2.96 (td, *J* = 7.8, 3.0 Hz, 2H), 1.59 (s, 9H); <sup>13</sup>C NMR (CDCl<sub>3</sub>, 150 MHz): δ 167.5, 151.0, 133.7, 132.6, 131.9(9), 131.9(6), 131.5, 129.7, 128.7, 126.8, 126.4, 126.3, 125.1, 124.0, 83.0, 43.4, 28.0, 23.3; IR (neat): 2978, 2930, 1772, 1715, 1647, 1475, 1367, 1311, 1292, 1153 cm<sup>-1</sup>; HRMS (ESI): *m/z* calcd for C<sub>20</sub>H<sub>21</sub>NNaO<sub>3</sub> [M+Na]<sup>+</sup> 346.1414; Found 346.1422.

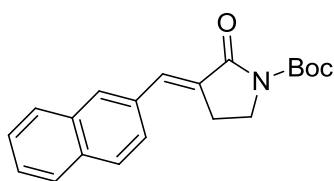

(*E*)-*tert*-Butyl 3-(naphthalen-2-ylmethylene)-2-oxopyrrolidine-1-carboxylate

(**1r**): This compound was prepared from 2-naphthaldehyde (0.78 g, 5.0 mmol) according to the Procedure A followed by the Procedure B. The compound was purified by column chromatography on silica gel using 10-15% ethyl acetate in hexanes as eluent. 790 mg (49%); white solid; m.p. 187-189 °C; <sup>1</sup>H NMR (CDCl<sub>3</sub>, 600 MHz): δ 7.94 (s, 1H), 7.88-7.80 (m, 3H), 7.67 (m, 1H), 7.59 (m, 1H), 7.53-7.49 (m, 2H), 3.86 (dd, *J* = 6.6, 7.2 Hz, 2H), 3.15 (td, *J* =

7.8, 3.0 Hz, 2H), 1.57 (s, 9H);  $^{13}\text{C}$  NMR ( $\text{CDCl}_3$ , 150 MHz):  $\delta$  167.8, 150.9, 134.2, 133.4, 133.3, 132.7, 130.5, 130.2, 128.6, 128.5, 127.7, 127.2, 126.7(6), 126.7(3), 82.9, 43.3, 28.0, 23.4; IR (neat): 3014, 2574, 1758, 1639, 1367, 1304, 1163  $\text{cm}^{-1}$ ; HRMS (ESI):  $m/z$  calcd for  $\text{C}_{20}\text{H}_{21}\text{NNaO}_3$   $[\text{M}+\text{Na}]^+$  346.1414; Found 346.1421.

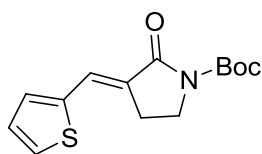

(*E*)-*tert*-Butyl 2-oxo-3-(thiophen-2-ylmethylene)pyrrolidine-1-carboxylate (**1s**):

This compound was prepared from 2-thiophenecarboxaldehyde (0.56 g, 5.0 mmol) according to the Procedure A followed by the Procedure B. The compound was purified by column chromatography on silica gel using 10-15% ethyl acetate in hexanes as eluent. 0.80 mg (58%); white solid; m.p. 145-147  $^{\circ}\text{C}$ ;  $^1\text{H}$  NMR ( $\text{CDCl}_3$ , 600 MHz):  $\delta$  7.73 (t,  $J = 3.0$  Hz, 1H), 7.53 (d,  $J = 6.6$  Hz, 1H), 7.32 (d,  $J = 3.2$  Hz, 1H), 7.14 (m, 1H), 3.87 (dd,  $J = 7.2, 7.8$  Hz, 2H), 2.93 (td,  $J = 7.2, 3.0$  Hz, 2H), 1.56 (s, 9H);  $^{13}\text{C}$  NMR ( $\text{CDCl}_3$ , 150 MHz):  $\delta$  167.4, 150.7, 139.3, 131.7, 129.6, 127.9, 127.5, 126.9, 82.9, 43.2, 28.0, 23.0; IR (neat): 3063, 3012, 2976, 2917, 1755, 1721, 1704, 1638, 1363, 1332, 1316, 1253, 1157  $\text{cm}^{-1}$ ; HRMS (ESI):  $m/z$  calcd for  $\text{C}_{14}\text{H}_{17}\text{NNaO}_3\text{S}$   $[\text{M}+\text{Na}]^+$  302.0821; Found 302.0822.

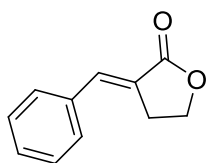

(*E*)-3-Benzylidenedihydrofuran-2(3H)-one<sup>2</sup> (**1t**): 320 mg (81%); white solid; m.p.

110-112  $^{\circ}\text{C}$ ;  $^1\text{H}$  NMR ( $\text{CDCl}_3$ , 600 MHz):  $\delta$  7.58 (t,  $J = 3.0$  Hz, 1H), 7.51 (d,  $J = 7.2$  Hz, 2H), 7.48-7.43 (m, 2H), 7.41 (m, 1H), 4.47 (dd,  $J = 6.6, 7.8$  Hz, 2H), 3.26 (td,  $J = 7.8, 3.0$  Hz, 2H);  $^{13}\text{C}$  NMR ( $\text{CDCl}_3$ , 150 MHz):  $\delta$  172.4, 136.5, 134.5, 129.9, 129.7, 128.8, 123.4, 65.3, 27.3; IR (neat): 3085, 3028, 2994, 1741, 1651, 1452, 1386, 1364, 1226, 1193, 1182, 1060, 1023  $\text{cm}^{-1}$ ; HRMS (ESI):  $m/z$  calcd for  $\text{C}_{11}\text{H}_{10}\text{NaO}_2$   $[\text{M}+\text{Na}]^+$  197.0573; Found 197.0572.

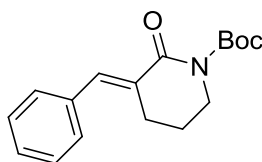

(*E*)-*tert*-Butyl 3-benzylidene-2-oxopiperidine-1-carboxylate (**1u**): This compound

was prepared from benzaldehyde (0.53 g, 5.0 mmol) and trifluoroacetyl piperidinone (0.98g, 5 mmol) according to the Procedure A followed by the Procedure B. The compound was purified by column chromatography on silica gel using 5-10% ethyl acetate in hexanes as eluent. 0.89 g (62%); white solid; m.p. 90-92  $^{\circ}\text{C}$ ;  $^1\text{H}$  NMR ( $\text{CDCl}_3$ , 600 MHz):  $\delta$  7.87



(t,  $J = 3.0$  Hz, 1H), 7.41-7.38 (m, 4H), 7.32 (m, 1H), 3.77-3.74 (m, 2H), 2.82-2.78 (m, 2H), 1.91-1.84 (m, 2H), 1.56 (s, 9H);  $^{13}\text{C}$  NMR ( $\text{CDCl}_3$ , 150 MHz):  $\delta$  165.7, 153.1, 138.4, 135.6, 130.7, 129.9, 128.5, 128.3, 82.9, 45.9, 28.0, 26.2, 25.4; IR (neat): 2978, 2938, 1762, 1713, 1615, 1392, 1368, 1295, 1270, 1149  $\text{cm}^{-1}$ ; HRMS (ESI):  $m/z$  calcd for  $\text{C}_{17}\text{H}_{21}\text{NNaO}_3$   $[\text{M}+\text{Na}]^+$  310.1414; Found 310.1417.

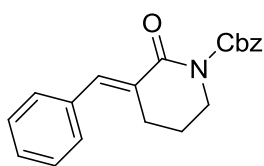

(*E*)-Benzyl 3-benzylidene-2-oxopiperidine-1-carboxylate (**1v**): This compound was prepared from benzaldehyde (0.53g, 5.0 mmol) and trifluoroacetyl piperidinone (0.98g, 5 mmol) according to the Procedure A followed by the

Procedure C. The compound was purified by column chromatography on silica gel using 50-100%  $\text{CH}_2\text{Cl}_2$  in hexanes as eluent. 860 mg (54%); white solid; m.p. 150-152  $^\circ\text{C}$ ;  $^1\text{H}$  NMR ( $\text{CDCl}_3$ , 600 MHz):  $\delta$  7.89 (t,  $J = 1.8$  Hz, 1H), 7.47 (d,  $J = 7.2$  Hz, 2H), 7.41-7.30 (m, 8H), 5.33 (s, 2H), 3.85-3.31 (m, 2H), 2.83-2.78 (m, 2H), 1.92-1.86 (m, 2H);  $^{13}\text{C}$  NMR ( $\text{CDCl}_3$ , 150 MHz):  $\delta$  165.6, 154.4, 139.0, 135.4(8), 135.4(4), 130.4, 129.9, 128.6, 128.5, 128.3, 128.2, 128.0, 68.5, 46.3, 26.1, 22.4; IR (neat): 2940, 2870, 1710, 1686, 1608, 1383, 1288, 1255, 1168  $\text{cm}^{-1}$ ; HRMS (ESI):  $m/z$  calcd for  $\text{C}_{20}\text{H}_{19}\text{NNaO}_3$   $[\text{M}+\text{Na}]^+$  344.1257; Found 344.1259.

#### Procedure D for Catalytic Asymmetric Boronate Conjugate Addition to Alkylidene Lactams

An oven dried Schlenk flask charged with  $\text{Cu}(\text{I})\text{Cl}$  (0.02 mmol, 10 mol%), (*R*)-DM-Segphos (0.022 mmol, 11 mol%), bis(pinacolato)diboron **2** (0.26 mmol) was purged with argon (evacuated and backfilled with argon three times). Anhydrous THF (2 mL) was added to this flask and allowed to stir at room temperature for 30 min. The reaction was then cooled to 0  $^\circ\text{C}$  and potassium *tert*-butoxide (0.1 mmol, 50 mol%) was carefully added under argon flow. After 5 min, alkylidene lactam (**1**, 0.2 mmol) was added and continued to stir for 5 min followed by the addition of anhydrous isopropyl alcohol (30  $\mu\text{L}$ , 0.4 mmol). After stirring for 15 min, the reaction was warmed to room temperature and stirred until the starting material was fully consumed by TLC (for 2-6 h, TLC eluent: 20% acetone in hexanes). The solvent was removed under reduced pressure and the residue was purified by column chromatography on silica gel.

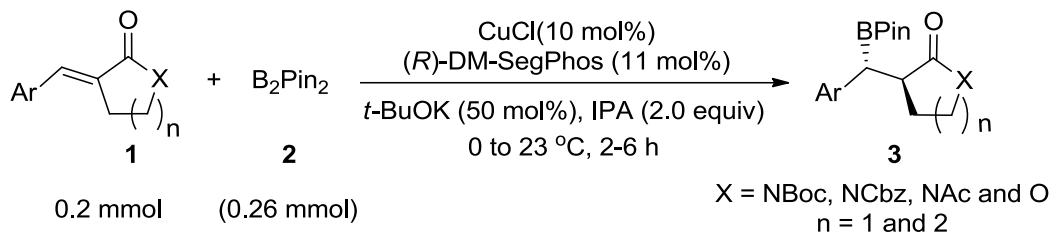

### Procedure E for Oxidation of Boronate Adducts to Alcohols

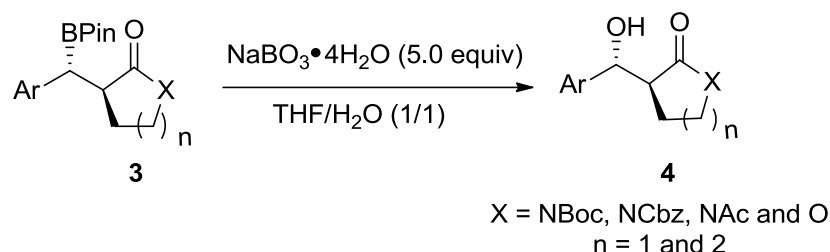

To a solution of pinacolboron **3** (0.1 mmol) in 2 mL of THF/water (1/1) was added sodium perborate tetrahydrate (0.5 mmol, 5 equiv) and stirred for 2 h. The reaction was then diluted with water (5 mL) and ethyl acetate (5 mL). The organic layer was separated, and aqueous layer was extracted with ethyl acetate (2x5 mL). Organic layers were combined, dried over sodium sulfate, concentrated and the corresponding alcohol product was isolated by column chromatography on silica gel with 100% CH<sub>2</sub>Cl<sub>2</sub> as eluent.

#### 1.0 mmol Scale Reaction for the Synthesis of Compound 3a

An argon purged oven dried two-neck round bottom flask was filled with Cu(I)Cl (9.8 mg, 0.1 mmol, 10 mol%), (R)-DM-SegPhos (79 mg, 0.11 mmol, 11 mol%) and bis(pinacolato)diboron **2** (330 mg, 1.3 mmol) and then the flask was evacuated and backfilled with argon three time. Anhydrous THF (10 mL) was added to this flask and the solution was stirred for 30 min. The reaction was cooled down to 0 °C and a solution of potassium *tert*-butoxide (0.5 mL, 1M in THF) was added dropwise. After 5 min, a solution of **1a** (273 mg, 1.0 mmol) in 1.0 mL dry THF was added and the solution was stirred for 10 min followed by the addition of anhydrous isopropyl alcohol (0.15 mL, 2 mmol). After 15 min stirring at this temperature, the solution was warmed to room temperature and stirred for 3 h. The solvent was removed under reduced

pressure and the residue was purified by column chromatography on silica gel using 4-6% acetone in hexanes as eluent. 352 mg (88%), dr 95:5, 92% ee. The NMR data are consistent with the characterization data of **3a** from the 0.2 mmol scale.

### Characterization Data for the Compounds in Scheme 3

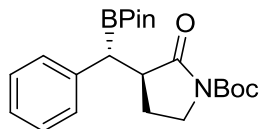

(*S*)-*tert*-Butyl 2-oxo-3-((*R*)-phenyl(4,4,5,5-tetramethyl-1,3,2-dioxaborolan-2-yl)methyl)pyrrolidine-1-carboxylate (**3a**): The compound was synthesized using **1a** (55 mg, 0.2 mmol) by the Procedure D and purified by column chromatography on

silica gel using 4-6% acetone in hexanes as eluent. 73 mg (91%); dr 95:5; 94% ee; white solid; m.p. 145-147 °C; <sup>1</sup>H NMR (CDCl<sub>3</sub>, 600 MHz): δ 7.26-7.20 (m, 4H), 7.15 (m, 1H), 3.65 (m, 1H), 3.43 (td, *J* = 11.4, 7.2 Hz, 1H), 3.18 (td, *J* = 11.4, 8.4 Hz, 1H), 2.36 (d, *J* = 11.4 Hz, 1H), 1.86 (m, 1H), 1.49-1.51 (m, 1H), 1.50 (s, 9H), 1.22 (s, 6H), 1.19 (s, 6H); <sup>13</sup>C NMR (CDCl<sub>3</sub>, 150 MHz): δ 175.8, 150.0, 139.6, 128.6, 128.4, 125.8, 83.5, 82.4, 47.0, 44.6, 27.9, 24.9, 24.7, 24.3; HPLC conditions: IA column, 2-propanol/hexanes = 3/97, flow rate 1.0 mL/min, retention time = 8.07 min (minor) and 8.84 min (major); IR (neat): 2979, 2932, 1781, 1746, 1717, 1508, 1369, 1317, 1153, 1233 cm<sup>-1</sup>; HRMS (ESI): *m/z* calcd for C<sub>22</sub>H<sub>32</sub>BNO<sub>5</sub>Na [M+Na]<sup>+</sup> 424.2266; Found 424.2270.

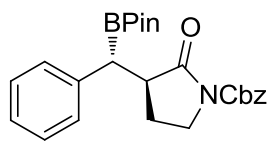

(*S*)-Benzyl 2-oxo-3-((*R*)-phenyl(4,4,5,5-tetramethyl-1,3,2-dioxaborolan-2-yl)methyl)pyrrolidine-1-carboxylate (**3b**): The compound was synthesized using **1b** (62 mg, 0.2 mmol) by the Procedure D and purified by column chromatography

on silica gel using 4-6% acetone in hexanes as eluent. 78 mg (89%); dr 96:4; 94% ee; white solid; m.p. 117-118 °C; <sup>1</sup>H NMR (CDCl<sub>3</sub>, 600 MHz): δ 7.42 (d, *J* = 7.2 Hz, 2H), 7.38-7.30 (m, 3H), 7.27-7.20 (m, 4H), 7.16 (m, 1H), 5.28 (d, *J* = 12.6 Hz, 1H), 5.25 (d, *J* = 12.6 Hz, 1H), 3.73 (m, 1H), 3.52 (m, 1H), 3.21 (td, *J* = 10.8, 8.4 Hz, 1H), 2.40 (d, *J* = 10.8 Hz, 1H), 1.90 (m, 1H), 1.54 (m, 1H), 1.23 (s, 6H), 1.20 (m, 6H); <sup>13</sup>C NMR (CDCl<sub>3</sub>, 150 MHz): δ 175.6, 151.3, 139.3, 135.4, 128.7, 128.4 (2C), 128.2, 128.1, 125.9, 83.6, 67.7, 46.9, 44.6, 24.8, 24.6, 24.4; HPLC conditions: AD-H column, 2-propanol/hexanes = 3/97, flow rate 1.0

mL/min, 220 nm, retention time = 21.04 min (major) and 29.15 min (minor); IR (neat): 2977, 2930, 1787, 1748, 1723, 1453, 1359, 1302, 1277, 1141, 1037  $\text{cm}^{-1}$ ; HRMS (ESI):  $m/z$  calcd for  $\text{C}_{25}\text{H}_{31}\text{BNO}_5$   $[\text{M}+\text{H}]^+$  436.2290; Found 436.2295.

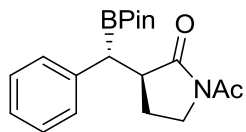

(*S*)-1-Acetyl-3-((*R*)-phenyl(4,4,5,5-tetramethyl-1,3,2-dioxaborolan-2-yl)methyl)pyrrolidin-2-one (**3c**): The compound was synthesized using **1c** (43 mg, 0.2 mmol) by the Procedure D and purified by column chromatography on silica gel using 4-

6% acetone in hexanes as eluent. 60 mg (87%); dr 66:34;

NMR data for major diastereomer  $^1\text{H}$  NMR ( $\text{CDCl}_3$ , 600 MHz):  $\delta$  7.30-7.10 (m, 5H), 3.83 (m, 1H), 3.44 (m, 1H), 3.28 (m, 1H), 2.51 (s, 3H), 2.41 (d,  $J = 10.2$  Hz, 1H), 1.98 (m, 1H), 1.55 (m, 1H), 1.24 (s, 6H), 1.21 (s, 6H);  $^{13}\text{C}$  NMR ( $\text{CDCl}_3$ , 150 MHz):  $\delta$  177.2, 171.4 139.3, 129.7, 128.7, 126.1, 83.7, 47.8, 43.4, 24.9, 24.7, 24.5(9), 24.5(3).

NMR data for minor diastereomer

$^1\text{H}$  NMR ( $\text{CDCl}_3$ , 600 MHz): 7.30-7.10 (m, 5 H), 3.82 (m, 1 H), 3.42 (m, 1 H), 3.08 (m, 1H), 2.87 (d,  $J = 5.4$  Hz, 1H), 2.49 (s, 3 H), 2.0-1.94 (m, 2 H), 1.26 (s, 6 H), 1.23 (s, 6 H);  $^{13}\text{C}$  NMR ( $\text{CDCl}_3$ , 150 MHz):  $\delta$  177.0, 171.5, 139.7, 130.2, 128.6, 126.2, 83.9, 47.9, 43.3, 24.9(5), 24.7, 24.53, 22.7.

HPLC conditions: AD-H column, 2-propanol/hexanes = 3/97, flow rate 0.5 mL/min, 220 nm. retention time for major diastereomer = 12.01 (major) and 14.31 (minor), 71% ee; retention time for minor diastereomer = 15.36 min (minor) and 16.28 min (major), 78% ee; IR (neat): 2978, 2932, 1735, 1697, 1495, 1372, 1298, 1142  $\text{cm}^{-1}$ ; HRMS (ESI):  $m/z$  calcd for  $\text{C}_{19}\text{H}_{27}\text{BNO}_4$   $[\text{M}+\text{H}]^+$  344.2028; Found 344.2026.

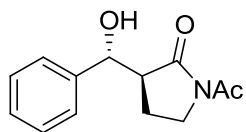

(*S*)-1-Acetyl-3-((*R*)-hydroxy(phenyl)methyl)pyrrolidin-2-one (**4a**): The compound was synthesized using **3c** (35 mg, 0.1 mmol) by the Procedure E and purified by column chromatography on silica gel using  $\text{CH}_2\text{Cl}_2$  as eluent. 10 mg (43% yield);

colorless amorphous solid;  $^1\text{H}$  NMR ( $\text{CDCl}_3$ , 600 MHz):  $\delta$  7.39-7.36 (m, 4H), 7.30 (m, 1H), 5.41 (d,  $J =$

3.6 Hz, 1H), 3.85 (m, 1H), 3.50 (m, 1H), 2.98 (td,  $J = 9.0, 3.6$  Hz, 1H), 2.55 (s, 3H), 2.37 (d,  $J = 6.6$  Hz, 1H), 2.18 (m, 1H), 1.78 (m, 1H);  $^{13}\text{C}$  NMR ( $\text{CDCl}_3$ , 150 MHz):  $\delta$  175.6, 171.2, 141.5, 128.5, 127.7, 125.4, 71.2, 51.9, 43.2, 25.0, 16.8; IR (neat): 3480, 2982, 1731, 1488, 1378, 1166, 1051  $\text{cm}^{-1}$ ; HRMS (ESI):  $m/z$  calcd for  $\text{C}_{13}\text{H}_{16}\text{NO}_3$   $[\text{M}+\text{H}]^+$  234.1125; Found 234.1128.

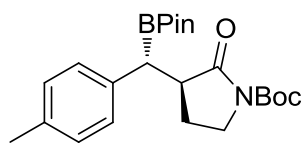

(*S*)-*tert*-Butyl 2-oxo-3-((*R*)-(4,4,5,5-tetramethyl-1,3,2-dioxaborolan-2-yl)(*p*-tolyl)methyl)pyrrolidine-1-carboxylate (**3d**): The compound was synthesized using **1e** (58 mg, 0.2 mmol) by the Procedure D and purified by column chromatography on silica gel using 4-6% acetone in hexanes as eluent. 68 mg (82%); dr 94:6; 94% ee; white solid; m.p. 120-123 °C;  $^1\text{H}$  NMR ( $\text{CDCl}_3$ , 600 MHz):  $\delta$  7.10 (d,  $J = 8.4$  Hz, 2H), 7.04 (d,  $J = 8.4$  Hz, 2H), 3.63 (m, 1H), 3.42 (m, 1H), 3.12 (td,  $J = 10.8, 7.8$  Hz, 1H), 2.31 (d,  $J = 10.8$  Hz, 1H), 2.76 (s, 3H), 1.84 (m, 1H), 1.48 (s, 9H), 1.48-1.49 (m, 1H), 1.20 (s, 6H), 1.18 (s, 6H);  $^{13}\text{C}$  NMR ( $\text{CDCl}_3$ , 150 MHz):  $\delta$  175.9, 150.0, 136.3, 135.2, 129.1, 128.5, 83.4, 82.4, 47.0, 44.6, 29.7, 24.8, 24.7, 24.3, 20.9; HPLC conditions: AD-H column, 2-propanol/hexanes = 2/98, flow rate 1.0 mL/min, 220 nm, retention time = 11.04 min (major) and 13.52 min (minor); IR (neat): 2978, 2930, 1778, 1745, 1716, 1511, 1368, 1317, 1153  $\text{cm}^{-1}$ ; HRMS (ESI):  $m/z$  calcd for  $\text{C}_{23}\text{H}_{34}\text{BNO}_5\text{Na}$   $[\text{M}+\text{Na}]^+$  438.2422; Found 438.2423.

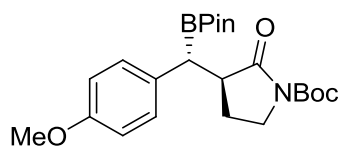

(*S*)-*tert*-Butyl 2-oxo-3-((*R*)-(4,4,5,5-tetramethyl-1,3,2-dioxaborolan-2-yl)(*p*-tolyl)methyl)pyrrolidine-1-carboxylate (**3e**): The compound was synthesized using **1f** (61 mg, 0.2 mmol) by the Procedure D and purified by column chromatography on silica gel using 4-6% acetone in hexanes as eluent. 71 mg (82%); dr 95:5; 92% ee; pale yellow amorphous solid;  $^1\text{H}$  NMR ( $\text{CDCl}_3$ , 600 MHz):  $\delta$  7.15 (d,  $J = 9.0$  Hz, 2H), 6.81 (d,  $J = 9.0$  Hz, 2H), 3.77 (s, 3H), 3.64 (m, 1H), 3.44 (td,  $J = 10.8, 6.0$  Hz, 1H), 3.10 (m, 1H), 2.33 (d,  $J = 10.8$  Hz, 1H), 1.86 (m, 1H), 1.50-1.51 (m, 1H), 1.50 (s, 9H), 1.23 (s, 6H), 1.20 (s, 6H);  $^{13}\text{C}$  NMR ( $\text{CDCl}_3$ , 150 MHz): 175.8, 157.7, 149.9, 131.3, 129.6, 113.8, 83.4, 82.4, 55.0, 47.1, 44.6, 27.9, 24.7 (2C), 24.3; HPLC conditions: AD-H column, 2-propanol/hexanes = 2/98, flow rate 1.0 mL/min, 220 nm, retention time =

17.40 min (major) and 19.26 min (minor); IR (neat): 2978, 2933, 1718, 1716, 1602, 1510, 1455, 1369, 1317, 1251, 1151  $\text{cm}^{-1}$ ; HRMS (ESI):  $m/z$  calcd for  $\text{C}_{23}\text{H}_{34}\text{BNO}_6\text{Na}$   $[\text{M}+\text{Na}]^+$  432.2552; Found 432.2554.

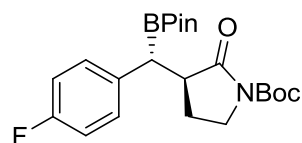

(*S*)-*tert*-Butyl 3-((*R*)-(4-fluorophenyl)(4,4,5,5-tetramethyl-1,3,2-dioxaborolan-2-yl)methyl)-2-oxopyrrolidine-1-carboxylate (**3f**): The compound was synthesized using **1g** (58 mg, 0.2 mmol) by the Procedure D and purified by column chromatography on silica gel using 4-6% acetone in hexanes as eluent. 73 mg (87%); dr 95:5; 96% ee; white solid; m.p. 168-170  $^{\circ}\text{C}$ ;  $^1\text{H}$  NMR ( $\text{CDCl}_3$ , 600 MHz):  $\delta$  7.20-7.15 (m, 2H), 6.96-6.90 (m, 2H), 3.65 (m, 1H), 3.42 (m, 1H), 3.09 (m, 1H), 2.34 (d,  $J = 10.8$  Hz, 1H), 1.85 (m, 1H), 1.48 (s, 9H), 1.47-1.48 (m, 1H), 1.20 (s, 6H), 1.18 (s, 6H);  $^{13}\text{C}$  NMR ( $\text{CDCl}_3$ , 150 MHz):  $\delta$  175.7, 162.2 (d,  $J = 242.7$  Hz), 150.0, 135.3, 130.1 (d,  $J = 24.1$  Hz), 115.4 (d,  $J = 21.6$  Hz), 83.7, 82.7, 47.2, 44.7, 28.0, 24.8(8), 24.8(5), 24.4; HPLC conditions: AD-H column, 2-propanol/hexanes = 1/99, flow rate 1.0 mL/min, 220 nm, retention time = 20.38 min (major) and 23.88 min (minor); IR (neat): 2978, 2932, 1781, 1745, 1717, 1508, 1369, 1318, 1153  $\text{cm}^{-1}$ ; HRMS (ESI):  $m/z$  calcd for  $\text{C}_{22}\text{H}_{31}\text{BFNO}_5\text{Na}$   $[\text{M}+\text{Na}]^+$  442.2172; Found 442.2174.

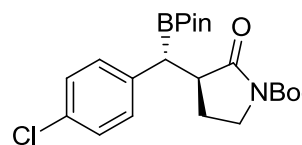

(*S*)-*tert*-Butyl 3-((*R*)-(4-chlorophenyl)(4,4,5,5-tetramethyl-1,3,2-dioxaborolan-2-yl)methyl)-2-oxopyrrolidine-1-carboxylate (**3g**): The compound was synthesized using **1h** (62 mg, 0.2 mmol) by the Procedure D and purified by column chromatography on silica gel using 4-6% acetone in hexanes as eluent. 76 mg (87%); dr 93:7; 94% ee; white solid; m.p. 132-134  $^{\circ}\text{C}$ ;  $^1\text{H}$  NMR ( $\text{CDCl}_3$ , 600 MHz):  $\delta$  7.25-7.21 (m, 2H), 7.19-7.16 (m, 2H), 3.68 (m, 1H), 3.48 (m, 1H), 3.14 (m, 1H), 2.35 (d,  $J = 10.8$  Hz, 1H), 1.87 (m, 1H), 1.50 (s, 9H), 1.48-1.50 (m, 1H), 1.22 (s, 6H), 1.20 (s, 6H);  $^{13}\text{C}$  NMR ( $\text{CDCl}_3$ , 150 MHz):  $\delta$  175.5, 149.9, 138.2, 131.6, 130.0, 128.5, 83.7, 82.6, 47.0, 44.6, 27.9, 24.8, 24.7, 24.3; HPLC conditions: IA column, 2-propanol/hexanes = 2/98, flow rate 1.0 mL/min, 220 nm, retention time = 10.38 min (major) and 11.67 min (minor); IR (neat): 2978, 2932, 1781, 1745, 1716, 1490, 1369, 1317, 1141  $\text{cm}^{-1}$ ; HRMS (ESI):  $m/z$  calcd for  $\text{C}_{22}\text{H}_{31}\text{BClNO}_5\text{Na}$   $[\text{M}+\text{Na}]^+$  458.1876; Found 458.1886.

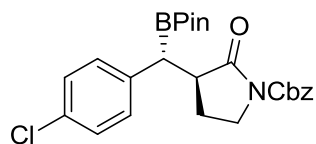

(*S*)-Benzyl 3-((*R*)-(4-chlorophenyl)(4,4,5,5-tetramethyl-1,3,2-dioxaborolan-2-yl)methyl)-2-oxopyrrolidine-1-carboxylate (**3h**): The compound was synthesized using **1i** (68 mg, 0.2 mmol) by the Procedure D and purified by column chromatography on silica gel using 4-6% acetone in hexanes as eluent. 84 mg (89%); dr 95:5; 95% ee; white solid; m.p. 111-113 °C; <sup>1</sup>H NMR (CDCl<sub>3</sub>, 600 MHz): δ 7.44-7.39 (m, 2H), 7.38-7.31 (m, 3H), 7.23 (d, *J* = 8.4 Hz, 2H), 7.17 (d, *J* = 8.4 Hz, 2H), 5.27 (d, *J* = 12.0 Hz, 1H), 5.25 (d, *J* = 12.0 Hz, 1H), 3.74 (m, 1H), 3.52 (m, 1H), 3.17 (m, 1H), 2.38 (d, *J* = 10.8 Hz, 1H), 1.90 (m, 1H), 1.54 (m, 1H), 1.23 (s, 6H), 1.20 (s, 6H); <sup>13</sup>C NMR (CDCl<sub>3</sub>, 150 MHz): δ 175.3, 151.2, 137.9, 135.3, 131.7, 130.0, 128.6, 128.5, 128.3, 128.1, 83.8, 67.8, 46.8, 44.5, 24.7, 24.6, 24.4; HPLC conditions: IE column, 2-propanol/hexanes = 1/9, flow rate 1.0 mL/min, 220 nm, retention time = 19.11 min (major) and 26.69 min (minor); IR (neat): 2977, 2931, 1787, 1747, 1722, 1490, 1380, 1304, 1141 cm<sup>-1</sup>; HRMS (ESI): *m/z* calcd for C<sub>25</sub>H<sub>29</sub>BClNO<sub>5</sub>Na [M+Na]<sup>+</sup> 492.1720; Found 492.1726.

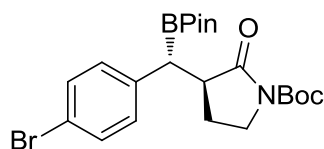

(*S*)-*tert*-Butyl 3-((*R*)-(4-bromophenyl)(4,4,5,5-tetramethyl-1,3,2-dioxaborolan-2-yl)methyl)-2-oxopyrrolidine-1-carboxylate (**3i**): The compound was synthesized using **1j** (70 mg, 0.2 mmol) by the Procedure D and purified by column chromatography on silica gel using 4-6% acetone in hexanes as eluent. 88 mg (91%); dr 94:6; 96% ee; white solid; m.p. 116-118 °C; <sup>1</sup>H NMR (CDCl<sub>3</sub>, 600 MHz): δ 7.40-7.36 (m, 2H), 7.14-7.10 (m, 2H), 3.68 (m, 1H), 3.46 (m, 1H), 3.13 (m, 1H), 2.34 (d, *J* = 11.4 Hz, 1H), 1.87 (m, 1H), 1.50 (s, 9H), 1.49-1.50 (m, 1H), 1.22 (s, 6H), 1.20 (s, 6H); <sup>13</sup>C NMR (CDCl<sub>3</sub>, 150 MHz): δ 175.5, 149.9, 138.7, 131.5, 130.4, 119.6, 83.7, 82.6, 46.9, 44.6, 27.9, 24.8, 24.7, 24.3; HPLC conditions: IA column, 2-propanol/hexanes = 2/98, flow rate 1.0 mL/min, 220 nm, retention time = 10.83 min (major) and 12.80 min (minor); IR (neat): 2977, 2932, 1780, 1745, 1717, 1468, 1368, 1317, 1141 cm<sup>-1</sup>; HRMS (ESI): *m/z* calcd for C<sub>22</sub>H<sub>31</sub>BBrNO<sub>5</sub>Na [M+Na]<sup>+</sup> 502.1371; Found 502.1376.

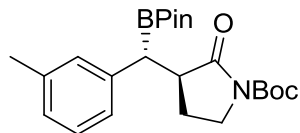

(*S*)-*tert*-Butyl 2-oxo-3-((*R*)-(4,4,5,5-tetramethyl-1,3,2-dioxaborolan-2-yl) (*m*-tolyl)methyl)pyrrolidine-1-carboxylate (**3j**): The compound was synthesized using **1k** (58 mg, 0.2 mmol) by the Procedure D and purified by column chromatography on silica gel using 4-6% acetone in hexanes as eluent. 75 mg (90%); dr 94:6; 90% ee; white solid; m.p. 62-64 °C; <sup>1</sup>H NMR (CDCl<sub>3</sub>, 600 MHz): δ 7.14 (m, 1H), 7.04 (s, 1H), 7.03 (d, *J* = 7.8 Hz, 1H), 6.97 (d, *J* = 7.2 Hz, 1H), 3.66 (m, 1H), 3.44 (m, 1H), 3.17 (m, 1H), 2.31 (d, *J* = 10.8 Hz, 1H), 2.30 (s, 3H), 1.88 (m, 1H), 1.50 (s, 9H), 1.49-1.50 (m, 1H), 1.22 (s, 6H), 1.20 (s, 6H); <sup>13</sup>C NMR (CDCl<sub>3</sub>, 150 MHz): δ 175.9, 150.0, 139.4, 137.9, 129.5, 128.2, 126.5, 125.9, 83.5, 82.4, 47.0, 44.6, 27.9, 24.9, 24.7, 24.3, 21.3; HPLC conditions: IA column, 2-propanol/hexanes = 2/98, flow rate 1.0 mL/min, 220 nm, retention time = 8.67 min (minor) and 10.09 min (major); IR (neat): 2978, 2931, 1781, 1747, 1716, 1479, 1369, 1318, 1251, 1141 cm<sup>-1</sup>; HRMS (ESI): *m/z* calcd for C<sub>23</sub>H<sub>34</sub>BNO<sub>5</sub>Na [M+Na]<sup>+</sup> 438.2422; Found 438.2433.

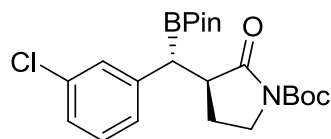

((*S*)-*tert*-Butyl 3-((*R*)-(3-chlorophenyl)(4,4,5,5-tetramethyl-1,3,2-dioxaborolan-2-yl)methyl)-2-oxopyrrolidine-1-carboxylate (**3k**): The compound was synthesized using **1l** (68 mg, 0.2 mmol) by the Procedure D and purified by column chromatography on silica gel using 4-6% acetone in hexanes as eluent. 80 mg (92%); dr 94:6; 89% ee; white solid; m.p. 120-123 °C; <sup>1</sup>H NMR (CDCl<sub>3</sub>, 600 MHz): δ 7.24 (t, *J* = 2.4 Hz, 1H), 7.19 (dd, *J* = 7.2, 7.8 Hz, 1H), 7.16-7.11 (m, 2H), 3.69 (m, 1H), 3.46 (m, 1H), 3.15 (m, 1H), 2.33 (d, *J* = 10.8 Hz, 1H), 1.88 (m, 1H), 1.50 (s, 9H), 1.49-1.50 (m, 1H), 1.23 (s, 6H), 1.21 (s, 6H); <sup>13</sup>C NMR (CDCl<sub>3</sub>, 150 MHz): δ 175.4, 149.8, 141.8, 134.1, 129.6, 128.6, 126.8, 126.0, 83.7, 82.6, 46.9, 44.6, 27.9, 24.8, 24.7, 24.2; HPLC conditions: IA column, 2-propanol/hexanes = 2/98, flow rate 1.0 mL/min, 220 nm, retention time = 9.47 min (minor) and 11.09 min (major); IR (neat): 2978, 2931, 1781, 1747, 1716, 1479, 1369, 1318, 1251, 1141 cm<sup>-1</sup>; HRMS (ESI): *m/z* calcd for C<sub>22</sub>H<sub>32</sub>BClNO<sub>5</sub> [M+H]<sup>+</sup> 436.2057; Found 436.2059.

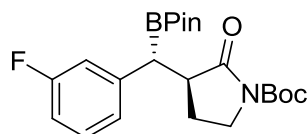

(*S*)-*tert*-Butyl 3-((*R*)-(3-fluorophenyl)(4,4,5,5-tetramethyl-1,3,2-dioxaborolan-2-yl)methyl)-2-oxopyrrolidine-1-carboxylate (**3l**): The compound was synthesized using **1m** (58 mg, 0.2 mmol) by the Procedure D and purified by



column chromatography on silica gel using 4-6% acetone in hexanes as eluent. 75mg (90%); dr 95:5; 94% ee; colorless amorphous solid;  $^1\text{H}$  NMR ( $\text{CDCl}_3$ , 600 MHz):  $\delta$  7.22 (m, 1H), 7.01 (d,  $J = 7.8$  Hz, 1H), 6.96 (m, 1H), 6.86 (m, 1H), 3.69 (m, 1H), 3.47 (m, 1H), 3.15 (m, 1H), 2.36 (d,  $J = 10.8$  Hz, 1H), 1.89 (m, 1H), 1.51-1.52 (m, 1H), 1.51 (s, 9H), 1.23 (s, 6H), 1.20 (s, 6H);  $^{13}\text{C}$  NMR ( $\text{CDCl}_3$ , 150 MHz):  $\delta$  175.4, 163.6 (d,  $J = 244.2$  Hz), 149.9, 142.3 (d,  $J = 7.2$  Hz), 129.8 (d,  $J = 8.7$  Hz), 124.4, 115.3 (d,  $J = 20.1$ Hz), 112.8 (d,  $J = 20.1$ Hz), 83.7, 82.5, 47.0, 44.6, 27.9, 24.8, 24.7, 24.3; HPLC conditions: IA column, 2-propanol/hexanes = 2/98, flow rate 1.0 mL/min, 220 nm, retention time = 9.68 min (minor) and 11.54 min (major); IR (neat): 2979, 2932, 1781, 1746, 1716, 1612, 1586, 1485, 1370, 1317, 1255, 1141  $\text{cm}^{-1}$ ; HRMS (ESI):  $m/z$  calcd for  $\text{C}_{22}\text{H}_{31}\text{BFNO}_5\text{Na}$   $[\text{M}+\text{Na}]^+$  442.2172; Found 442.2177.

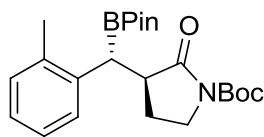

((*S*)-*tert*-Butyl 2-oxo-3-((*R*)-(4,4,5,5-tetramethyl-1,3,2-dioxaborolan-2-yl) (*o*-tolyl)methyl)pyrrolidine-1-carboxylate (**3m**): The compound was synthesized using **1n** (58 mg, 0.2 mmol) by the Procedure D and purified by column

chromatography on silica gel using 4-6% acetone in hexanes as eluent. 76 mg (92%); colorless amorphous solid; dr 74:26.

NMR data for major diastereomer

$^1\text{H}$  NMR ( $\text{CDCl}_3$ , 600 MHz):  $\delta$  7.24 (m, 1H), 7.17-7.07 (m, 2H), 7.03 (m, 1H), 3.69 (m, 1H), 3.47 (m, 1H), 3.30 (m, 1H), 2.65 (d,  $J = 11.4$  Hz, 1H), 2.33 (s, 3H), 1.96 (m, 1H), 1.51 (s, 9H), 1.40 (m, 1H), 1.18 (s, 6H), 1.16 (s, 6H);  $^{13}\text{C}$  NMR ( $\text{CDCl}_3$ , 150 MHz):  $\delta$  176.1, 150.0, 137.9, 136.4, 130.2, 127.3, 125.8, 125.2, 83.3, 82.4, 46.7, 44.6, 27.9, 25.1, 24.6, 24.2, 20.3

NMR data for minor diastereomer

$^1\text{H}$  NMR ( $\text{CDCl}_3$ , 600 MHz):  $\delta$  7.17-7.06 (m, 4H), 3.75 (m, 1H), 3.43 (m, 1H), 3.13 (d,  $J = 4.8$  Hz, 1H), 2.92 (m, 1H), 2.32 (s, 3H), 2.01 (m, 1H), 1.51 (s, 9H), 1.44 (m, 1H), 1.25 (s, 6H), 1.22 (s, 6H);  $^{13}\text{C}$  NMR ( $\text{CDCl}_3$ , 150 MHz):  $\delta$  175.3, 150.4, 138.4, 136.6, 130.3, 129.6, 126.0, 125.8, 83.5, 82.1, 46.2, 44.4, 29.9, 24.8, 24.4, 22.4, 19.7

HPLC conditions: IA column, 2-propanol/hexanes = 2/98, flow rate 1.0 mL/min, 220 nm. retention time for major diastereomer = 6.35 min (minor) and 7.23 min (major), 98% ee; retention time for minor diastereomer: 8.70 (major) and 13.65 (minor), 92% ee; IR (neat): 2978, 2932, 1781, 1746, 1716, 1480, 1369, 1318, 1248, 1142  $\text{cm}^{-1}$ ; HRMS (ESI):  $m/z$  calcd for  $\text{C}_{23}\text{H}_{34}\text{BNO}_5\text{Na}$   $[\text{M}+\text{Na}]^+$  438.2422; Found 438.2433.

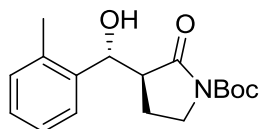

(*S*)-*tert*-Butyl 3-((*R*)-hydroxy(*o*-tolyl)methyl)-2-oxopyrrolidine-1-carboxylate

**(4b)**: The compound was synthesized using **3m** (42mg, 0.1 mmol) by the Procedure

E. The crude NMR of the reaction mixture **3m** showed 74/26 dr. The major isomer

was obtained by column chromatography on silica gel using 100%  $\text{CH}_2\text{Cl}_2$  as eluent. 21 mg (69%); colorless amorphous solid;  $^1\text{H}$  NMR ( $\text{CDCl}_3$ , 600 MHz):  $\delta$  7.41 (d,  $J = 7.2$  Hz, 1H), 7.23 (m, 1H), 7.19 (td,  $J = 7.2$ , 1.2 Hz, 1H), 7.15 (d,  $J = 7.2$  Hz, 1H), 5.10 (d,  $J = 9.0$  Hz, 1H), 4.82 (s, 1H), 3.75 (m, 1H), 3.51 (td,  $J = 10.8$ , 7.2 Hz, 1H), 3.01 (m, 1H), 2.41 (s, 3H), 1.74 (m, 1H), 1.55 (s, 9H), 1.51 (m, 1H);  $^{13}\text{C}$  NMR ( $\text{CDCl}_3$ , 150 MHz):  $\delta$  177.0, 149.8, 138.1, 135.7, 130.6, 127.9, 126.8, 126.4, 83.5, 71.2, 49.2, 44.5, 27.9, 21.4, 19.5; IR (neat): 3475, 2979, 2931, 1774, 1719, 1369, 1304, 1256, 1152  $\text{cm}^{-1}$ ; HRMS (ESI):  $m/z$  calcd for  $\text{C}_{17}\text{H}_{23}\text{NO}_4\text{Na}$   $[\text{M}+\text{Na}]^+$  328.1519; Found 328.1523.

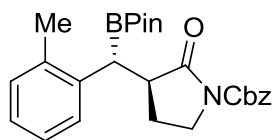

(*S*)-Benzyl 2-oxo-3-((*R*)-(4,4,5,5-tetramethyl-1,3,2-dioxaborolan-2-yl)(*o*-tolyl)

methyl)pyrrolidine-1-carboxylate (**3n**): The compound was synthesized using **1o**

(64 mg, 0.2 mmol) by the Procedure D and purified by column chromatography

on silica gel using 4-6% acetone in hexanes as eluent. 53 mg (59%); dr 83:17; colorless amorphous solid;

#### Data for major diastereomer

$^1\text{H}$  NMR ( $\text{CDCl}_3$ , 600 MHz):  $\delta$  7.42 (d,  $J = 7.8$  Hz, 2H), 7.34-7.29 (m, 3H), 7.24 (d,  $J = 7.8$  Hz, 1H), 7.19 (dd,  $J = 6.0$ , 7.2 Hz, 2H), 7.03 (t,  $J = 7.2$  Hz, 1H), 5.28 (d,  $J = 12.6$  Hz, 1H), 5.25 (d,  $J = 12.6$ , 1H), 3.75 (m, 1H), 3.53 (m, 1H), 3.32 (m, 1H), 2.65 (d,  $J = 10.8$  Hz, 1H), 2.32 (s, 3H), 1.97 (m, 1H), 1.46 (m, 1H),

1.18 (s, 6H), 1.15 (s, 6H);  $^{13}\text{C}$  NMR ( $\text{CDCl}_3$ , 150 MHz):  $\delta$  176.1, 151.5, 137.9, 136.6, 135.6, 130.5, 128.6, 128.4, 128.3, 127.5, 126.1, 125.5, 83.6, 67.9, 46.8, 44.8, 25.3, 24.7, 24.5, 20.6.

Data for minor diastereomer

$^1\text{H}$  NMR ( $\text{CDCl}_3$ , 600 MHz):  $\delta$  7.44-7.40 (m, 2H), 7.34-7.29 (m, 2H), 7.14-7.06 (m, 5H), 5.29-5.22 (m, 2H), 3.81 (m, 1H), 3.50 (m, 1H), 3.13 (d,  $J = 5.4$  Hz, 1H), 2.95 (m, 1H), 2.32 (s, 3H), 2.05 (m, 1H), 1.84 (m, 1H), 1.23 (s, 6H), 1.19 (s, 6H);  $^{13}\text{C}$  NMR ( $\text{CDCl}_3$ , 150 MHz):  $\delta$  175.4, 151.9, 138.3, 136.8, 135.8, 130.7, 129.7, 128.6, 128.3(7), 128.1, 128.2, 126.1, 83.9, 67.8, 46.3, 44.6, 24.9, 24.6, 22.9, 20.0;

HPLC conditions: AD-H column, 2-propanol/hexanes = 5/95, flow rate 1.0 mL/min, 220 nm. retention time for major diastereomer = 8.78 (major) and 12.40 (minor), 99% ee; retention time for minor diastereomer = 10.10 min (major) and 15.53 min (minor), 91% ee; IR (neat): 2975, 2932, 1780, 1740, 1715, 1480, 1368, 1315, 1251, 1142  $\text{cm}^{-1}$ ; HRMS (ESI):  $m/z$  calcd for  $\text{C}_{26}\text{H}_{33}\text{BNO}_5$   $[\text{M}+\text{H}]^+$  450.2446; Found 450.2448.

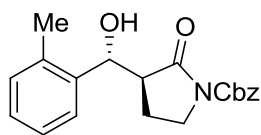

(*S*)-Benzyl 3-((*R*)-hydroxy(*o*-tolyl)methyl)-2-oxopyrrolidine-1-carboxylate (**4c**):

The compound was synthesized using **3u** (45 mg, 0.1 mmol) by the Procedure E.

The crude NMR of the reaction mixture **3u** showed 83/17 dr. The major diastereomer was obtained by column chromatography on silica gel using 100%  $\text{CH}_2\text{Cl}_2$  as eluent. 27 mg (80%); colorless amorphous solid;  $^1\text{H}$  NMR ( $\text{CDCl}_3$ , 600 MHz):  $\delta$  7.44 (d,  $J = 7.2$  Hz, 2H), 7.42-7.34 (m, 4H), 7.23 (dd,  $J = 6.6, 7.8$  Hz, 1H), 7.19 (m, 1H), 7.15 (d,  $J = 7.2$  Hz, 1H), 5.31 (d,  $J = 12.6$  Hz, 1H), 5.30 (d,  $J = 12.6$  Hz, 1H), 5.10 (d,  $J = 9.6$  Hz, 1H), 4.66 (s, 1H), 3.81 (m, 1H), 3.58 (m, 1H), 3.05 (m, 1H), 2.40 (s, 3H), 1.78 (m, 1H), 1.56 (m, 1H);  $^{13}\text{C}$  NMR ( $\text{CDCl}_3$ , 150 MHz):  $\delta$  176.8, 151.1, 138.0, 135.6, 134.9, 130.7, 128.6, 128.5, 128.3, 128.0, 126.8, 126.5, 71.2, 68.4, 49.1, 44.5, 21.6, 19.5; IR (neat): 3475, 2979, 2920, 1782, 1719, 1456, 1380, 1295  $\text{cm}^{-1}$ ; HRMS (ESI):  $m/z$  calcd for  $\text{C}_{20}\text{H}_{22}\text{NO}_4$   $[\text{M}+\text{H}]^+$  340.1543; Found 340.1547.

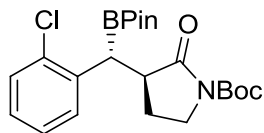

(*S*)-*tert*-Butyl 3-((*R*)-(2-chlorophenyl)(4,4,5,5-tetramethyl-1,3,2-dioxaborolan-2-yl)methyl)-2-oxopyrrolidine-1-carboxylate (**3o**): The compound was synthesized using **1p** (62mg, 0.2 mmol) by the Procedure D and purified by column

chromatography on silica gel using 4-6% acetone in hexanes as eluent. 76 mg (87 %); dr 62:38; colorless amorphous solid;

NMR data for major diastereomer

<sup>1</sup>H NMR (CDCl<sub>3</sub>, 600 MHz): δ 7.45 (m, 1H), 7.33 (m, 1H), 7.18 (m, 1H), 7.09 (m, 1H), 3.71 (m, 1H), 3.45 (m, 1H), 3.18 (m, 1H), 3.06 (d, *J* = 10.2 Hz, 1H), 1.86 (m, 1H), 1.65 (m, 1H), 1.51 (s, 9H), 1.23 (s, 6H), 1.21 (s, 6H); <sup>13</sup>C NMR (CDCl<sub>3</sub>, 150 MHz): δ 175.5, 150.0, 137.8, 134.4, 129.9, 129.6, 126.9, 126.7, 83.6, 82.4, 47.3, 44.5, 27.9, 24.9, 24.7, 24.3.

NMR data for minor diastereomer

<sup>1</sup>H NMR (CDCl<sub>3</sub>, 600 MHz): δ 7.39 (m, 1H), 7.33 (m, 1H), 7.16 (m, 1H), 7.13 (m, 1H), 3.63 (m, 1H), 3.43 (m, 1H), 3.34 (d, *J* = 4.8 Hz, 1H), 3.15 (m, 1H), 1.95 (m, 1H), 1.76 (m, 1H), 1.49 (s, 9H), 1.27 (s, 12H); <sup>13</sup>C NMR (CDCl<sub>3</sub>, 150 MHz): δ 175.1, 150.1, 137.4, 135.1, 132.0, 129.2, 127.4, 126.8, 83.8, 82.7, 46.4, 44.5, 29.9(8), 24.5, 24.4, 22.3.

HPLC conditions: AD-H column, 2-propanol/hexanes = 2/98, flow rate 1.0 mL/min, 220 nm. retention time for major diastereomer = 7.26 min (minor) and 12.15 min (major), 99% ee; retention time for minor diastereomer = 8.59 (major) and 11.44 (minor), 92% ee; IR (neat): 2979, 2932, 1781, 1746, 1716, 1480, 1368, 1315, 1251, 1142 cm<sup>-1</sup>; HRMS (ESI): *m/z* calcd for C<sub>22</sub>H<sub>31</sub>BClNO<sub>5</sub>Na [M+Na]<sup>+</sup> 458.1876; Found 458.1877. (Note: Attempts to separate diastereomers after conversion to alcohol were unsuccessful)

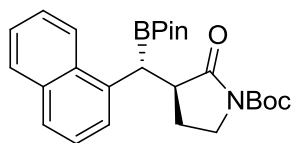

(*S*)-*tert*-Butyl 3-((*R*)-naphthalen-1-yl(4,4,5,5-tetramethyl-1,3,2-dioxaborolan-2-yl)methyl)-2-oxopyrrolidine-1-carboxylate (**3p**): The compound was synthesized using **1q** (65 mg, 0.2 mmol) by the Procedure D and purified by

column chromatography on silica gel using 4-6% acetone in hexanes as eluent. 51 mg (56 %); dr 83:17; colorless amorphous solid;

NMR Data for major diastereomer

$^1\text{H}$  NMR ( $\text{CDCl}_3$ , 600 MHz):  $\delta$  8.23 (d,  $J = 8.4$  Hz, 1H), 7.81 (d,  $J = 7.2$  Hz, 1H), 7.67 (d,  $J = 8.4$  Hz, 1H), 7.50-7.42 (m, 3H), 7.39 (t,  $J = 7.8$  Hz, 1H), 3.62 (m, 1H), 3.48-3.30 (m, 2H), 3.21 (d,  $J = 10.8$  Hz, 1H), 1.82 (m, 1H), 1.50 (s, 9H), 1.46 (m, 1H), 1.18 (s, 6H), 1.12 (s, 6H);  $^{13}\text{C}$  NMR ( $\text{CDCl}_3$ , 150 MHz):  $\delta$  176.1, 150.0, 136.3, 133.9, 132.4, 128.6, 126.3, 125.6, 125.5 (2C), 125.4, 124.2, 83.6, 82.5, 47.1, 44.6, 27.9, 24.9, 24.6, 24.3

NMR Data for minor diastereomer

$^1\text{H}$  NMR ( $\text{CDCl}_3$ , 600 MHz):  $\delta$  8.11 (d,  $J = 8.4$  Hz, 1H), 7.82 (d,  $J = 7.2$  Hz, 1H), 7.70 (m, 1H), 7.50-7.42 (m, 3H), 7.37 (t,  $J = 7.8$  Hz, 1H), 3.80 (m, 1H), 3.70 (m, 1H), 3.63 (m, 1H), 3.09 (m, 1H), 2.01 (m, 1H), 1.58 (s, 9H), 1.45 (m, 1H), 1.28 (s, 6H), 1.24 (s, 6H);  $^{13}\text{C}$  NMR ( $\text{CDCl}_3$ , 150 MHz):  $\delta$  175.4, 150.4, 136.2, 134.1, 132.3, 128.9, 128.6, 127.3, 126.9, 126.0, 125.4, 123.4, 83.7, 82.2, 46.7, 44.5, 28.0, 24.6, 24.4, 22.5.

HPLC conditions: IA column, 2-propanol/hexanes = 2/98, flow rate 1.0 mL/min, 220 nm. retention time for major diastereomer = 9.52 min (minor) and 11.31 min (major), 99% ee; retention time for minor diastereomer = 12.40 (major) and 21.05 (minor), 92% ee; IR (neat): 2978, 2931, 1719, 1745, 1716, 1369, 1318, 1260, 1152  $\text{cm}^{-1}$ ; HRMS (ESI):  $m/z$  calcd for  $\text{C}_{26}\text{H}_{34}\text{BNO}_5\text{Na}$   $[\text{M}+\text{Na}]^+$  474.2422; Found 474.2432.

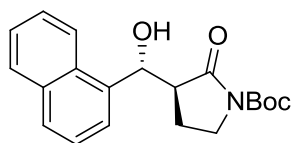

(*S*)-*tert*-Butyl 3-((*R*)-hydroxy(naphthalen-1-yl)methyl)-2-oxopyrrolidine-1-carboxylate (**4d**): The compound was synthesized using **3q** (45 mg, 0.1 mmol) by the Procedure E. The crude NMR of the reaction mixture **3q** showed 83/17

dr. The major isomer was obtained by column chromatography on silica gel using 100%  $\text{CH}_2\text{Cl}_2$  as eluent. 24 mg (72%) colorless amorphous solid;  $^1\text{H}$  NMR ( $\text{CDCl}_3$ , 600 MHz):  $\delta$  8.39 (d,  $J = 7.8$  Hz, 1H), 7.88 (d,  $J = 7.2$  Hz, 1H), 7.83 (d,  $J = 7.8$  Hz, 1H), 7.57 (d,  $J = 7.2$  Hz, 1H), 7.55-7.45 (m, 3H), 5.52 (d,  $J = 9.6$  Hz,

1H), 5.08 (s, 1H), 3.71 (m, 1H), 3.47 (m, 1H), 3.25 (m, 1H), 1.65-1.52 (m, 2H), 1.55 (s, 9H); <sup>13</sup>C NMR (CDCl<sub>3</sub>, 150 MHz): 177.0, 149.8, 135.7, 134.0, 131.1, 128.9(4), 128.9 (2C), 126.1, 125.6, 125.2, 123.7, 83.5, 73.0, 49.3, 44.5, 27.9, 21.8; IR (neat): 3464, 2979, 2928, 1773, 1718, 13658, 1309, 1257, 1151 cm<sup>-1</sup>; HRMS (ESI): m/z calcd for C<sub>20</sub>H<sub>23</sub>NO<sub>4</sub>Na [M+Na]<sup>+</sup> 364.1519; Found 364.1514.

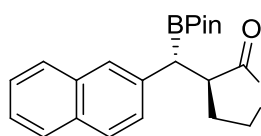

(*S*)-*tert*-Butyl 3-((*R*)-naphthalen-2-yl(4,4,5,5-tetramethyl-1,3,2-dioxaborolan-2-yl)methyl)-2-oxopyrrolidine-1-carboxylate (**3q**): The compound was synthesized using **1r** (65 mg, 0.2 mmol) by the Procedure D and purified by column chromatography on silica gel using 4-6% acetone in hexanes as eluent. 76 mg (87%); dr 95:05; 93% ee (major); white solid; m.p. 78-80 °C; <sup>1</sup>H NMR (CDCl<sub>3</sub>, 600 MHz): δ 7.78 (d, *J* = 8.4 Hz, 1H), 7.75 (dd, *J* = 6.0, 8.4 Hz, 2 H), 7.67 (s, 1H), 7.46-7.38 (m, 3H), 3.67 (m, 1H), 3.45 (td, *J* = 10.8, 6.6 Hz, 1H), 3.31 (m, 1H), 2.53 (d, *J* = 12.0 Hz, 1H), 1.85 (m, 1H), 1.53 (m, 1H), 1.51 (s, 9H), 1.22 (s, 6H), 1.19 (s, 6H); <sup>13</sup>C NMR (CDCl<sub>3</sub>, 150 MHz): δ 175.8, 149.9, 137.2, 133.6, 131.9, 127.9, 127.5, 127.4, 127.0(9), 127.0(1), 125.8, 125.1, 83.6, 82.5, 47.0, 44.7, 27.9, 25.0, 24.7, 24.3; HPLC conditions: IC column, 2-propanol/hexanes = 1/9, flow rate 1.0 mL/min, 220 nm, retention time = 8.26 min (minor) and 10.47 min (major); IR (neat): 2978, 2931, 1778, 1744, 1716, 1599, 1477, 1455, 1370, 1317, 1256, 1151 cm<sup>-1</sup>; HRMS (ESI): m/z calcd for C<sub>26</sub>H<sub>34</sub>BNO<sub>5</sub>Na [M+Na]<sup>+</sup> 474.2422; Found 474.2432.

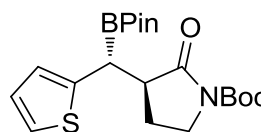

(*S*)-*tert*-Butyl 2-oxo-3-((*R*)-(4,4,5,5-tetramethyl-1,3,2-dioxaborolan-2-yl)(thiophen-2-yl)methyl)pyrrolidine-1-carboxylate (**3r**): The compound was synthesized using **1s** (56 mg, 0.2 mmol) by the Procedure D and purified by column chromatography on silica gel using 4-6% acetone in hexanes as eluent. 44 mg (54 %); dr 86:14; 74% ee (major); colorless oil; <sup>1</sup>H NMR (CDCl<sub>3</sub>, 600 MHz): δ 7.11 (d, *J* = 4.8 Hz, 1H), 6.91(m, 1H), 6.85 (d, *J* = 3.6 Hz, 1H), 3.67 (m, 1H), 3.47 (m, 1H), 3.07 (m, 1H), 2.74 (d, *J* = 10.2 Hz, 1H), 1.99 (m, 1H), 1.63 (m, 1H), 1.50 (s, 9H), 1.27 (s, 6H), 1.24 (s, 6H); <sup>13</sup>C NMR (CDCl<sub>3</sub>, 150 MHz): δ 175.3, 150.0, 141.9, 126.9, 125.3, 123.6, 84.0, 82.7, 47.9, 44.7, 28.1, 24.9, 24.7, 24.5; HPLC conditions: IC column, 2-propanol/hexanes = 1/9, flow rate 1.0 mL/min, 220 nm, retention time = 9.22 min (minor) and 14.36 min

(major); IR (neat): 2977, 2918, 1769, 1361, 1326, 1215, 1140  $\text{cm}^{-1}$ ; HRMS (ESI):  $m/z$  calcd for  $\text{C}_{20}\text{H}_{30}\text{BNO}_5\text{SNa}$   $[\text{M}+\text{Na}]^+$  430.1830; Found 430.1840.

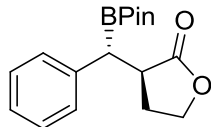

(*S*)-3-((*R*)-Phenyl(4,4,5,5-tetramethyl-1,3,2-dioxaborolan-2-yl)methyl)dihydrofuran-2(3*H*)-one (**3s**): The compound was synthesized using **1t** (35 mg, 0.2 mmol) by the Procedure D and purified by column chromatography on silica gel using 4-6% acetone

in hexanes as eluent. 34 mg (56 %); dr 76:24; 56% ee (major); colorless oil.

#### NMR data for major diastereomer

$^1\text{H}$  NMR ( $\text{CDCl}_3$ , 600 MHz):  $\delta$  7.33-7.16 (m, 5H), 4.24 (m, 1H), 4.12 (m, 1H), 3.20 (m, 1H), 2.44 (d,  $J = 10.8$  Hz, 1H), 2.11 (m, 1H), 1.83 (m, 1H), 1.24 (s, 6H), 1.21 (s, 6H);  $^{13}\text{C}$  NMR ( $\text{CDCl}_3$ , 150 MHz):  $\delta$  179.2, 139.4, 128.7, 128.6, 126.1, 83.9, 67.0, 42.7, 29.1, 24.7, 24.5.

#### NMR data for minor diastereomer

$^1\text{H}$  NMR ( $\text{CDCl}_3$ , 600 MHz):  $\delta$  7.33-7.16 (m, 5H), 4.21 (m, 1H), 4.08 (m, 1H), 3.02 (m, 1H), 2.86 (d,  $J = 4.8$  Hz, 1H), 2.27 (m, 1H), 2.14 (m, 1H), 1.27 (s, 6H), 1.25 (s, 6H);  $^{13}\text{C}$  NMR ( $\text{CDCl}_3$ , 150 MHz):  $\delta$  178.8, 139.7, 129.7, 128.6(6), 126.3, 84.0, 67.1, 43.1, 27.1, 24.8, 24.6.

HPLC conditions: IA column, 2-propanol/hexanes = 3/97, flow rate 1.0 mL/min, 220 nm, retention time = 19.68 min (minor) and 20.75 min (major); IR (neat): 2977, 2918, 1769, 1361, 1326, 1215, 1140  $\text{cm}^{-1}$ ; HRMS (ESI):  $m/z$  calcd for  $\text{C}_{17}\text{H}_{24}\text{BO}_4$   $[\text{M}+\text{H}]^+$  303.1762; Found 303.1766.

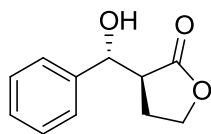

(*S*)-3-((*R*)-Hydroxy(phenyl)methyl)dihydrofuran-2(3*H*)-one (**4e**): The compound was synthesized using **3s** (0.2 mmol) by the Procedure E. The crude NMR of the reaction mixture **3s** showed 76/24 dr. The major diastereomer was obtained by column

chromatography on silica gel using 100%  $\text{CH}_2\text{Cl}_2$  as eluent. 13 mg (66%); colorless amorphous solid;  $^1\text{H}$  NMR ( $\text{CDCl}_3$ , 600 MHz):  $\delta$  7.41-7.31 (m, 5H), 4.83 (d,  $J = 9.0$  Hz, 1H), 4.32 (m, 1H), 4.29 (m, 1H), 4.16 (m, 1H), 2.98 (m, 1H), 2.03-1.92 (m, 2H);  $^{13}\text{C}$  NMR ( $\text{CDCl}_3$ , 150 MHz):  $\delta$  179.2, 140.2, 128.7, 128.4, 126.5,

74.6, 67.0, 46.2, 25.8; IR (neat): 3468, 2983, 2916, 1757, 1453, 1378, 1214, 1171, 1017  $\text{cm}^{-1}$ ; HRMS (ESI):  $m/z$  calcd for  $\text{C}_{11}\text{H}_{13}\text{O}_3$   $[\text{M}+\text{H}]^+$  193.0859; Found 193.0861.

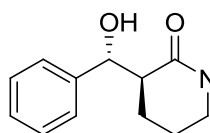

(*S*)-*tert*-Butyl 3-((*R*)-hydroxy(phenyl)methyl)-2-oxopiperidine-1-carboxylate (**4f**):

The compound was synthesized using **1u** (58 mg, 0.2 mmol) according to the Procedure D followed by The Procedure E. Due to the stability issue of the borylated product during column chromatography, the reaction mixture was directly subjected to the oxidation condition after the reaction was completed. The crude NMRs of the reaction mixtures for both borylation step as well as oxidation step showed 90/10 dr. The major diastereomer was obtained by column chromatography on silica gel using 100%  $\text{CH}_2\text{Cl}_2$  as eluent. 38 mg (62%); 74% ee; colorless amorphous solid;  $^1\text{H}$  NMR ( $\text{CDCl}_3$ , 600 MHz):  $\delta$  7.37-7.28 (m, 5H), 4.95 (s, 1H), 4.83 (d,  $J = 9.0$  Hz, 1H), 3.77 (m, 1H), 3.54 (m, 1H), 2.64 (m, 1H), 1.77 (m, 1H), 1.71 (m, 1H), 1.40-1.28 (m, 2H), 1.55 (s, 9H);  $^{13}\text{C}$  NMR ( $\text{CDCl}_3$ , 150 MHz):  $\delta$  175.5, 152.2, 140.7, 128.5, 128.1, 127.2, 83.6, 75.5, 50.1, 45.4, 28.0, 23.3, 21.6; HPLC conditions: OD-H column, 2-propanol/hexanes = 1/9, flow rate 1.0 mL/min, 220 nm, retention time = 8.70 min (major) and 11.35 min (minor); IR (neat): 3482, 3027, 2956, 2922, 1768, 1716, 1454, 1378, 1287, 1251, 1168  $\text{cm}^{-1}$ ; HRMS (ESI):  $m/z$  calcd for  $\text{C}_{17}\text{H}_{23}\text{NO}_4\text{Na}$   $[\text{M}+\text{Na}]^+$  328.1519; Found 328.1525.

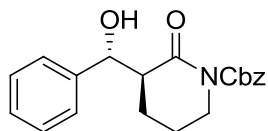

(*S*)-Benzyl 3-((*R*)-hydroxy(phenyl)methyl)-2-oxopiperidine-1-carboxylate (**4g**):

The compound was synthesized using **1v** (64 mg, 0.2 mmol) according to The Procedure D followed by the Procedure E. Due to the stability issue of the borylated product during column chromatography, the reaction mixture was directly subjected to the oxidation condition after the reaction was completed. The crude NMRs of the reaction mixtures for both borylation step as well as oxidation step showed 76/24 dr. The major diastereomer was isolated by column chromatography on silica gel using 100%  $\text{CH}_2\text{Cl}_2$  as eluent. 40 mg (58%); 80% ee; colorless amorphous solid;  $^1\text{H}$  NMR ( $\text{CDCl}_3$ , 600 MHz):  $\delta$  7.44 (d,  $J = 7.8$  Hz, 2H), 7.38 (dd,  $J = 7.2, 7.8$  Hz, 2H), 7.36-7.27 (m, 6H), 5.30 (s, 2H), 4.84 (dd,  $J = 2.4, 9.0$  Hz, 1H), 4.73 (d,  $J = 2.4$  Hz, 1H), 3.87 (m, 1H), 3.62 (m, 1H), 2.68 (m, 1H), 1.80 (m, 1H), 1.68 (m, 1H), 1.37 (m, 1H), 1.29 (m, 1H);  $^{13}\text{C}$  NMR ( $\text{CDCl}_3$ , 150 MHz):  $\delta$  175.3,



153.5, 140.4, 135.1, 128.6, 128.4 (2C), 128.2, 128.1, 127.0, 75.2, 68.8, 50.2, 45.5, 23.1, 21.4; HPLC conditions: OD-H column, 2-propanol/hexanes = 2/8, flow rate 1.0 mL/min, 220 nm, retention time = 8.07 min (minor) and 9.80 min (major); IR (neat): 3482, 3027, 2956, 2922, 1768, 1716, 1454, 1378, 1287, 1251, 1168  $\text{cm}^{-1}$ ; HRMS (ESI):  $m/z$  calcd for  $\text{C}_{20}\text{H}_{22}\text{NO}_4$   $[\text{M}+\text{H}]^+$  340.1543; Found 340.1546.

## References

1. Liu, X.; Han, Z.; Wang, Z.; Ding, K. *Angew. Chem. Int. Ed.* **2014**, *53*, 1978-1982.
2. Tian, F.; Yao, D.; Liu, Y.; Xie, F.; Zhang, W. *Adv. Synth. Catal.* **2010**, *352*, 1841-1845.

## Control Experiment with Isopropanol-D<sub>8</sub>

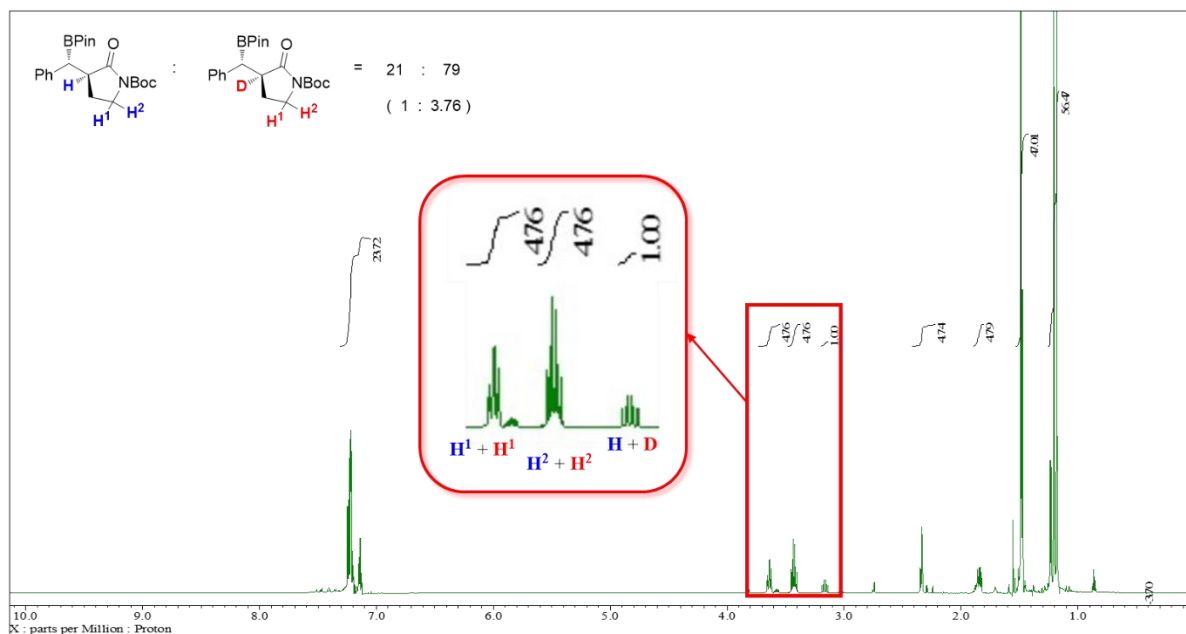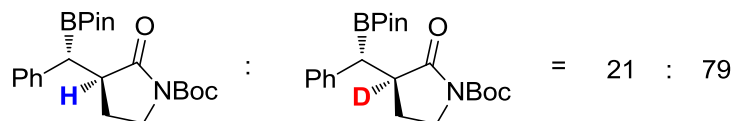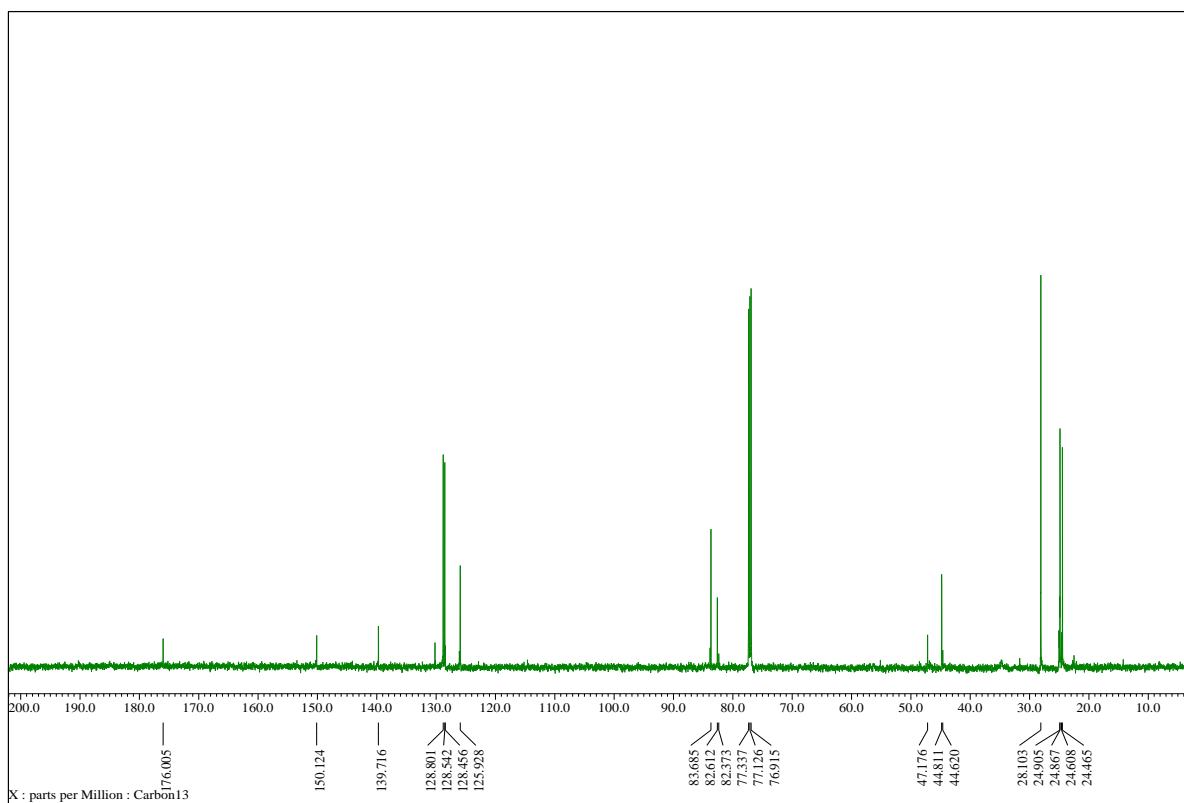

## X-Ray Analysis of Compound 3k

### X-Ray Crystal Data of Compound 3k (CCDC 1949071)

Bond precision: C-C = 0.0069 Å      Wavelength=0.71073  
Cell: a=9.0828(2)      b=9.6899(3)      c=14.3986(3)  
alpha=80.540(2)      beta=81.788(2)      gamma=71.284(2)

Temperature: 170 K

|                               | Calculated                                            | Reported                                                                                      |
|-------------------------------|-------------------------------------------------------|-----------------------------------------------------------------------------------------------|
| Volume                        | 1178.39(5)                                            | 1178.39(5)                                                                                    |
| Space group                   | P 1                                                   | P 1                                                                                           |
| Hall group                    | P 1                                                   | P 1                                                                                           |
| Moiety formula                | C <sub>22</sub> H <sub>31</sub> B Cl N O <sub>5</sub> | 2(C <sub>22</sub> H <sub>31</sub> B Cl N O <sub>5</sub> )                                     |
| Sum formula                   | C <sub>22</sub> H <sub>31</sub> B Cl N O <sub>5</sub> | C <sub>44</sub> H <sub>62</sub> B <sub>2</sub> Cl <sub>2</sub> N <sub>2</sub> O <sub>10</sub> |
| Mr                            | 435.74                                                | 871.47                                                                                        |
| Dx, g cm <sup>-3</sup>        | 1.228                                                 | 1.228                                                                                         |
| Z                             | 2                                                     | 1                                                                                             |
| Mu (mm <sup>-1</sup> )        | 0.193                                                 | 0.193                                                                                         |
| F000                          | 464.0                                                 | 464.0                                                                                         |
| F000'                         | 464.51                                                |                                                                                               |
| h,k,l max                     | 12,13,20                                              | 12,12,19                                                                                      |
| Nref                          | 13346[ 6673]                                          | 11142                                                                                         |
| Tmin,Tmax                     | 0.939,0.949                                           | 0.849,1.000                                                                                   |
| Tmin'                         | 0.939                                                 |                                                                                               |
| Correction method=            | # Reported T Limits:                                  | Tmin=0.849      Tmax=1.000                                                                    |
| AbsCorr = MULTI-SCAN          |                                                       |                                                                                               |
| Data completeness             | =                                                     | 1.67/0.83      Theta(max)= 29.671                                                             |
| R(reflections)= 0.0602( 9128) |                                                       | wR2(reflections)= 0.1509( 11142)                                                              |
| S = 1.053                     |                                                       | Npar= 555                                                                                     |

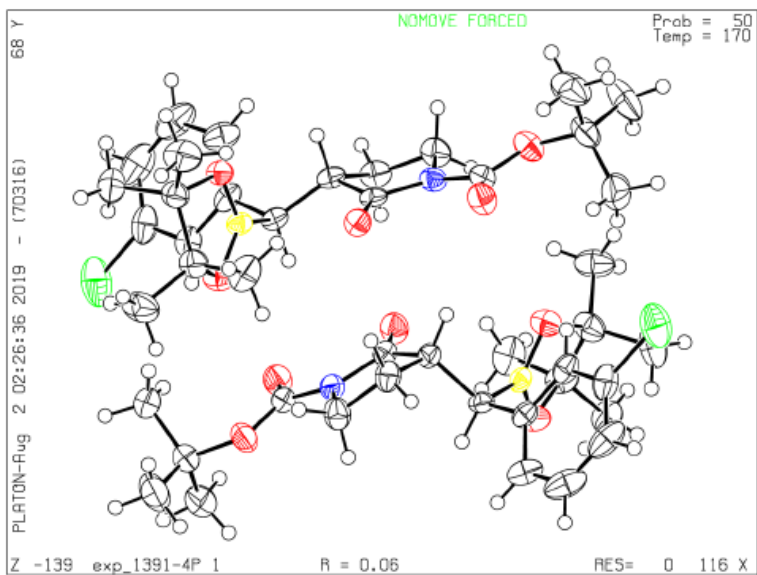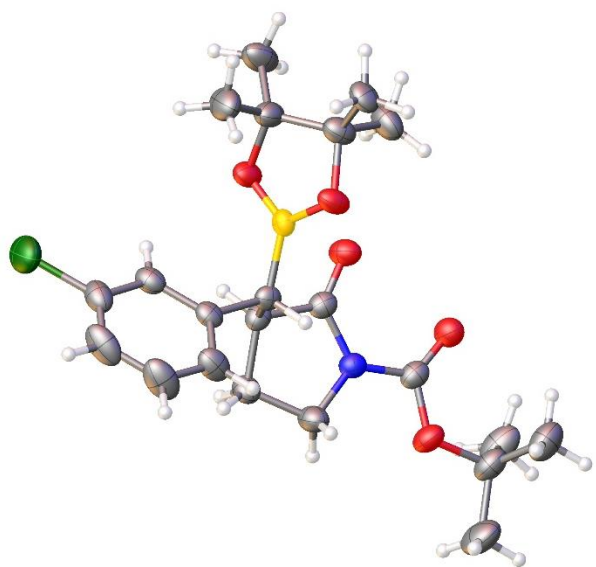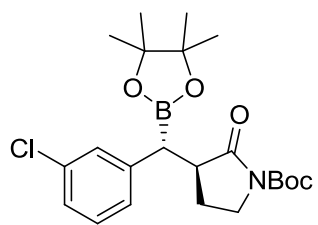

## HPLC Traces of Enantioenriched Compounds

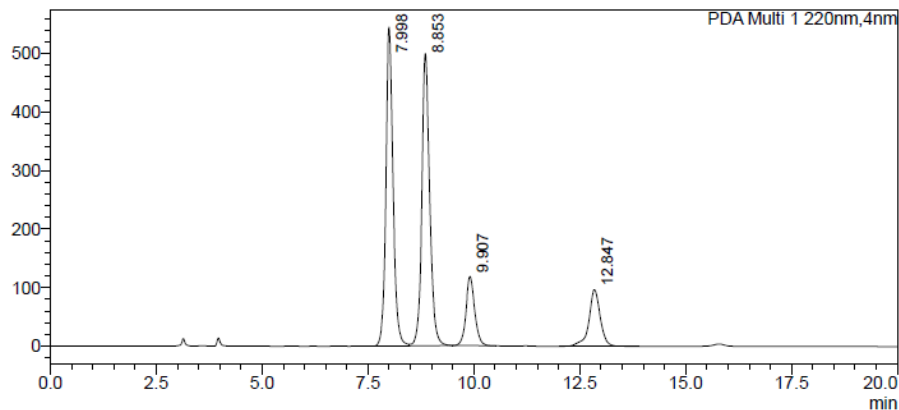

<Peak Table>

| PDA Ch1 220nm |           |          |         |         |
|---------------|-----------|----------|---------|---------|
| Peak#         | Ret. Time | Area     | Height  | Area%   |
| 1             | 7.998     | 6413152  | 545126  | 39.193  |
| 2             | 8.853     | 6455735  | 499718  | 39.453  |
| 3             | 9.907     | 1683941  | 118227  | 10.291  |
| 4             | 12.847    | 1810322  | 96933   | 11.063  |
| Total         |           | 16363150 | 1260004 | 100.000 |

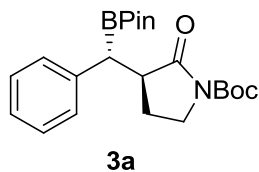

(IA column, IPA/hexanes: 2/98, flow rate 1.0 mL/min)

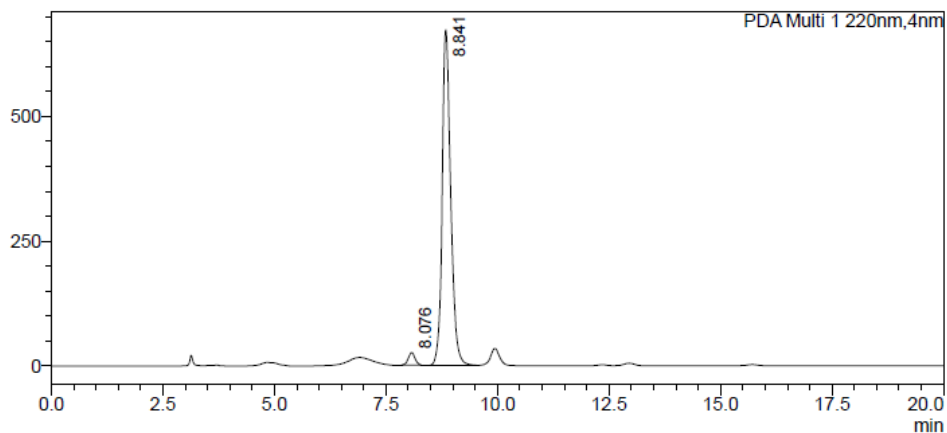

<Peak Table>

| PDA Ch1 220nm |           |         |        |         |
|---------------|-----------|---------|--------|---------|
| Peak#         | Ret. Time | Area    | Height | Area%   |
| 1             | 8.076     | 260690  | 24927  | 2.834   |
| 2             | 8.841     | 8938601 | 672836 | 97.166  |
| Total         |           | 9199291 | 697763 | 100.000 |

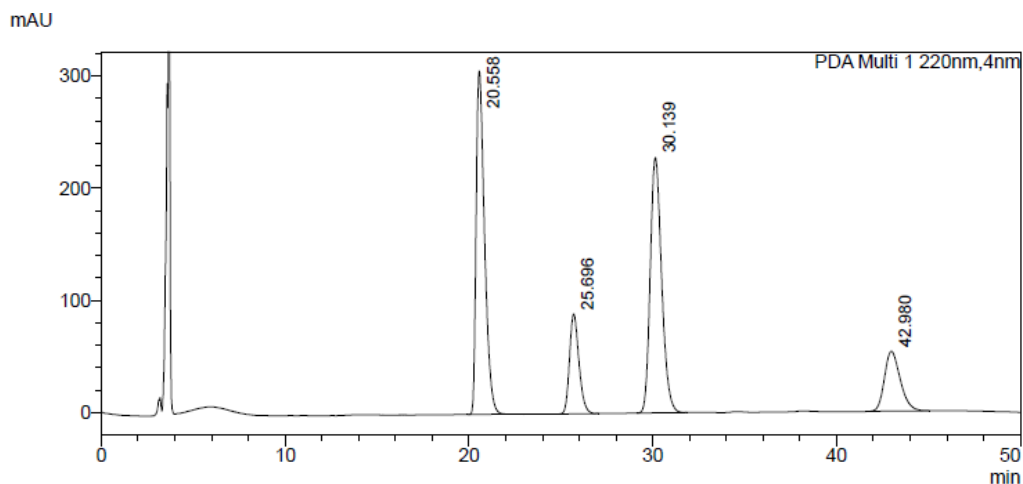

<Peak Table>

| PDA Ch1 220nm |           |          |        |         |
|---------------|-----------|----------|--------|---------|
| Peak#         | Ret. Time | Area     | Height | Area%   |
| 1             | 20.558    | 9730290  | 305976 | 37.625  |
| 2             | 25.696    | 3168403  | 89070  | 12.252  |
| 3             | 30.139    | 9783643  | 227349 | 37.832  |
| 4             | 42.980    | 3178635  | 53288  | 12.291  |
| Total         |           | 25860970 | 675683 | 100.000 |

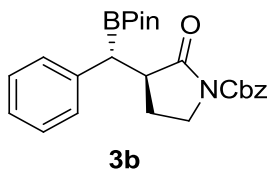

(AD-H column, IPA/hexanes: 3/97, flow rate 1.0 mL/min)

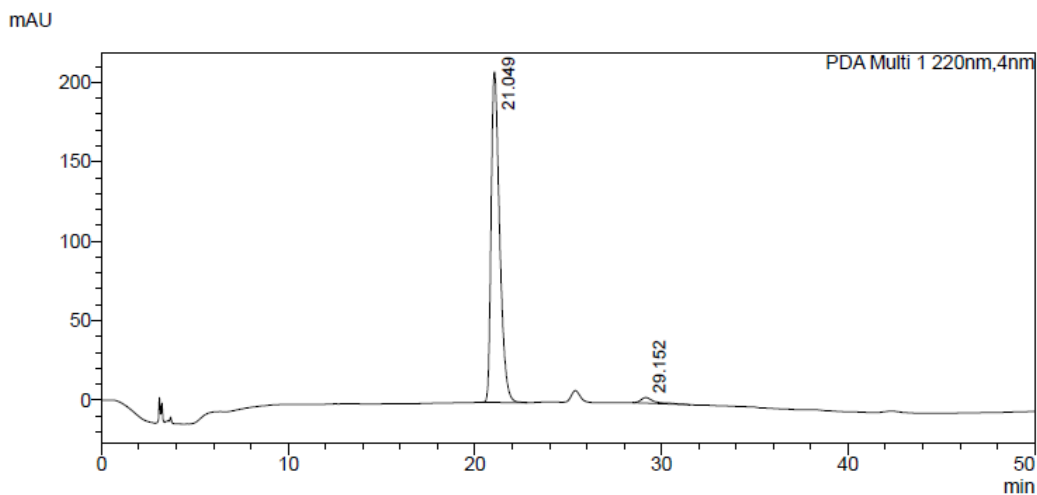

<Peak Table>

| PDA Ch1 220nm |           |         |        |         |
|---------------|-----------|---------|--------|---------|
| Peak#         | Ret. Time | Area    | Height | Area%   |
| 1             | 21.049    | 6561999 | 208013 | 97.333  |
| 2             | 29.152    | 179786  | 3508   | 2.667   |
| Total         |           | 6741785 | 211522 | 100.000 |

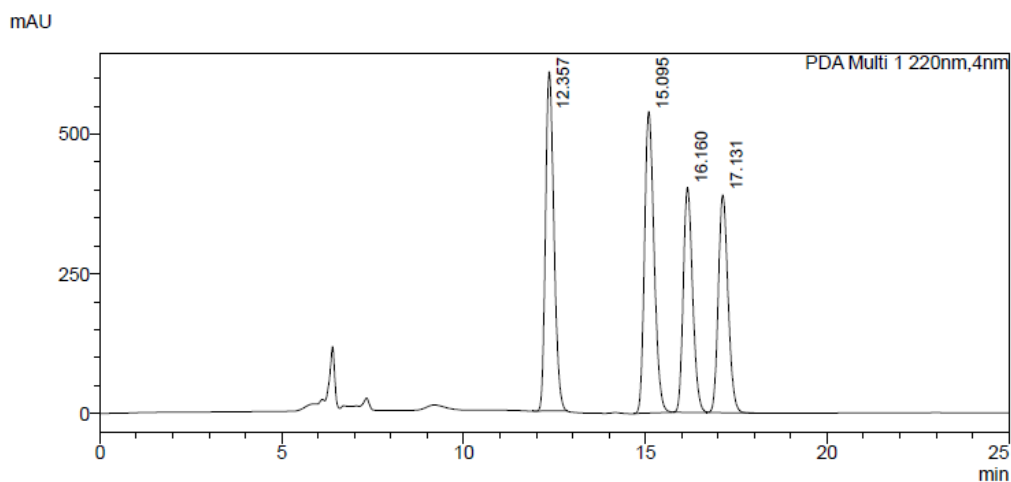

<Peak Table>

| PDA Ch1 220nm |           |          |         |         |
|---------------|-----------|----------|---------|---------|
| Peak#         | Ret. Time | Area     | Height  | Area%   |
| 1             | 12.357    | 9769589  | 606781  | 28.451  |
| 2             | 15.095    | 9884248  | 540027  | 28.785  |
| 3             | 16.160    | 7195180  | 402597  | 20.954  |
| 4             | 17.131    | 7265940  | 390117  | 21.160  |
| 5             | 48.733    | 223094   | 2412    | 0.650   |
| Total         |           | 34338052 | 1941934 | 100.000 |

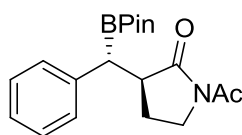

**3c**

(AD-H column, IPA/hexanes: 3/97, flow rate 0.5 mL/min)

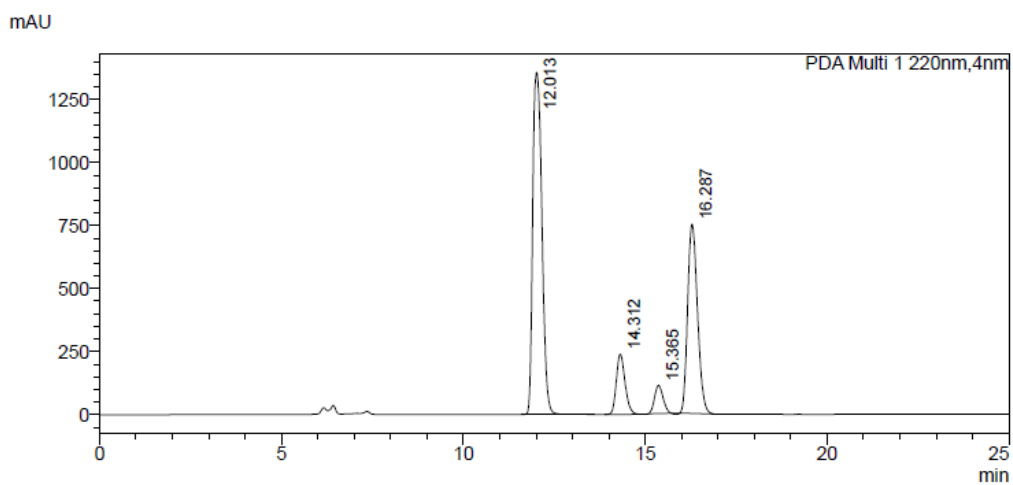

<Peak Table>

| PDA Ch1 220nm |           |          |         |         |
|---------------|-----------|----------|---------|---------|
| Peak#         | Ret. Time | Area     | Height  | Area%   |
| 1             | 12.013    | 23787742 | 1356795 | 54.414  |
| 2             | 14.312    | 4004654  | 239380  | 9.160   |
| 3             | 15.365    | 1769615  | 111231  | 4.048   |
| 4             | 16.287    | 14154600 | 750537  | 32.378  |
| Total         |           | 43716611 | 2457943 | 100.000 |

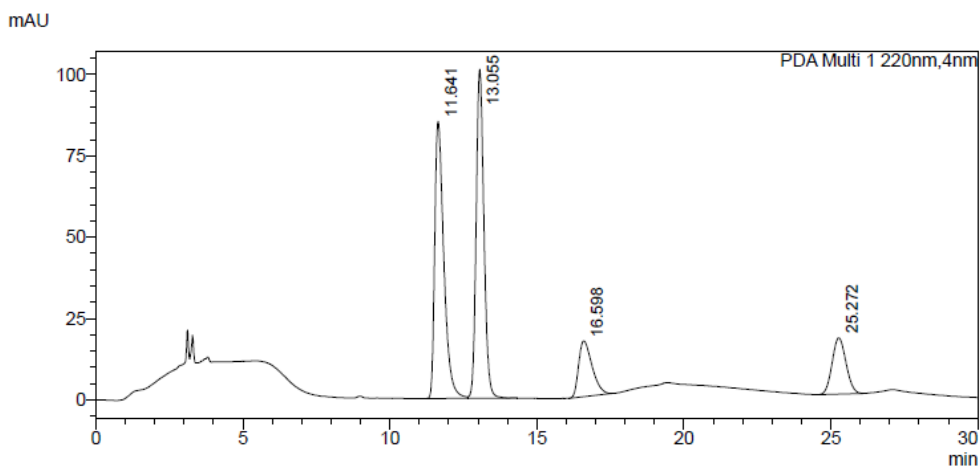

<Peak Table>

| PDA Ch1 220nm |           |         |        |         |
|---------------|-----------|---------|--------|---------|
| Peak#         | Ret. Time | Area    | Height | Area%   |
| 1             | 11.641    | 1832727 | 85095  | 38.244  |
| 2             | 13.055    | 1848201 | 101081 | 38.566  |
| 3             | 16.598    | 544486  | 17113  | 11.362  |
| 4             | 25.272    | 566834  | 17265  | 11.828  |
| Total         |           | 4792248 | 220554 | 100.000 |

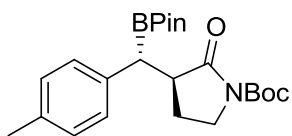

3d

(AD-H column, IPA/hexanes: 2/98, flow rate 1.0 mL/min)

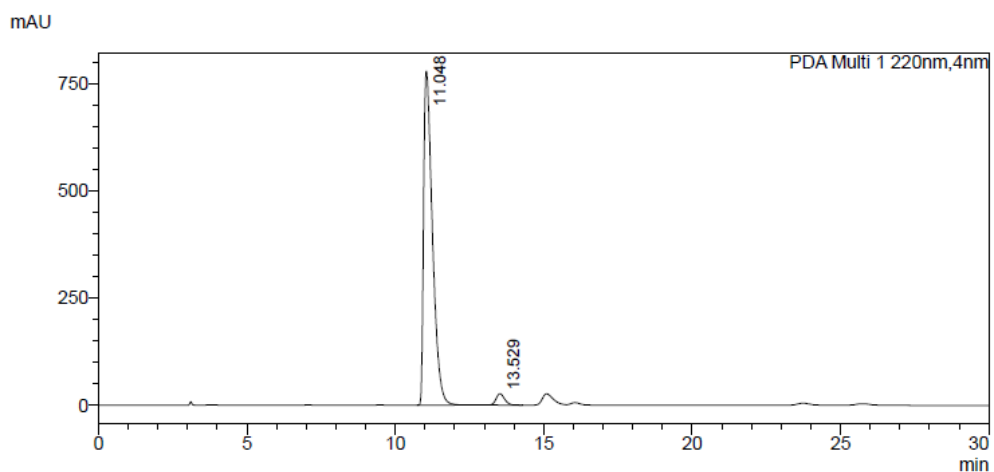

<Peak Table>

| PDA Ch1 220nm |           |          |        |         |
|---------------|-----------|----------|--------|---------|
| Peak#         | Ret. Time | Area     | Height | Area%   |
| 1             | 11.048    | 16141985 | 779618 | 96.792  |
| 2             | 13.529    | 535047   | 26841  | 3.208   |
| Total         |           | 16677032 | 806458 | 100.000 |



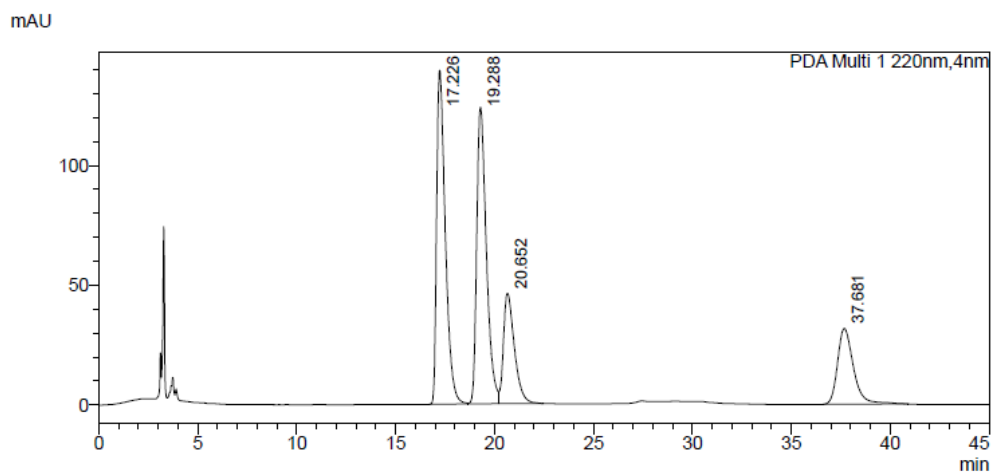

<Peak Table>

| PDA Ch1 220nm |           |          |        |         |
|---------------|-----------|----------|--------|---------|
| Peak#         | Ret. Time | Area     | Height | Area%   |
| 1             | 17.226    | 4250146  | 139299 | 35.465  |
| 2             | 19.288    | 4185601  | 123731 | 34.927  |
| 3             | 20.652    | 1774894  | 46079  | 14.810  |
| 4             | 37.681    | 1773387  | 31688  | 14.798  |
| Total         |           | 11984028 | 340796 | 100.000 |

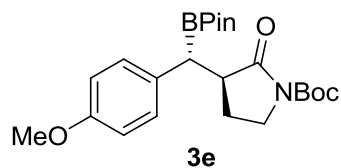

(AD-H column, IPA/hexanes: 2/98, flow rate 1.0 mL/min)

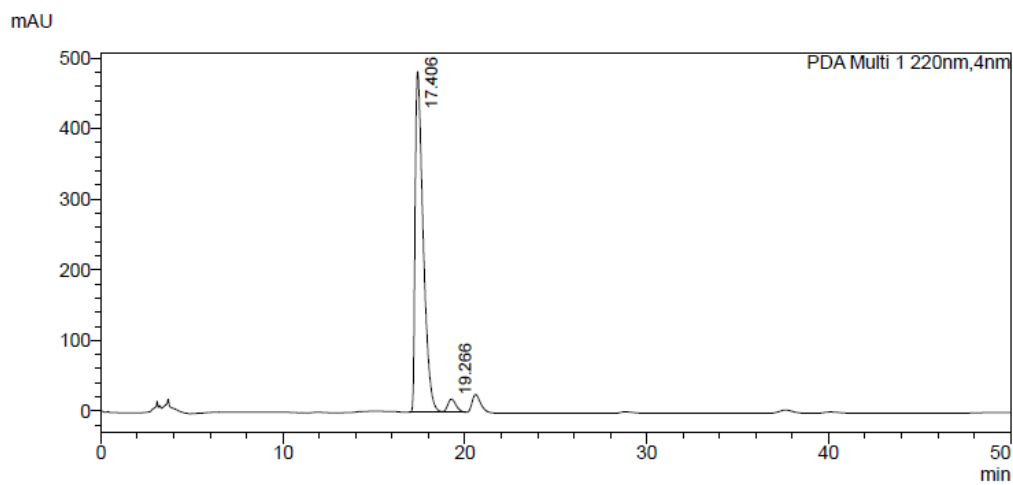

<Peak Table>

| PDA Ch1 220nm |           |          |        |         |
|---------------|-----------|----------|--------|---------|
| Peak#         | Ret. Time | Area     | Height | Area%   |
| 1             | 17.406    | 14841957 | 482434 | 96.111  |
| 2             | 19.266    | 600606   | 18747  | 3.889   |
| Total         |           | 15442563 | 501181 | 100.000 |

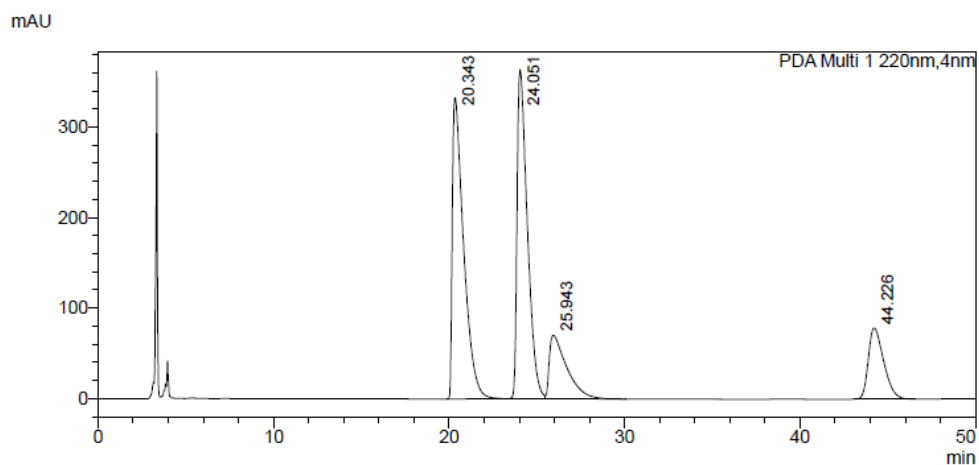

<Peak Table>

| PDA Ch1 220nm |           |          |        |         |
|---------------|-----------|----------|--------|---------|
| Peak#         | Ret. Time | Area     | Height | Area%   |
| 1             | 20.343    | 14916416 | 333144 | 37.917  |
| 2             | 24.051    | 14796911 | 363350 | 37.614  |
| 3             | 25.943    | 4844348  | 70032  | 12.314  |
| 4             | 44.226    | 4781466  | 78604  | 12.154  |
| Total         |           | 39339142 | 845130 | 100.000 |

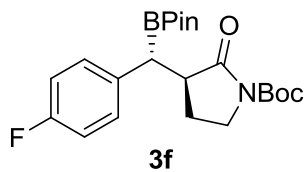

(AD-H column, IPA/hexanes: 1/99, flow rate 1.0 mL/min)

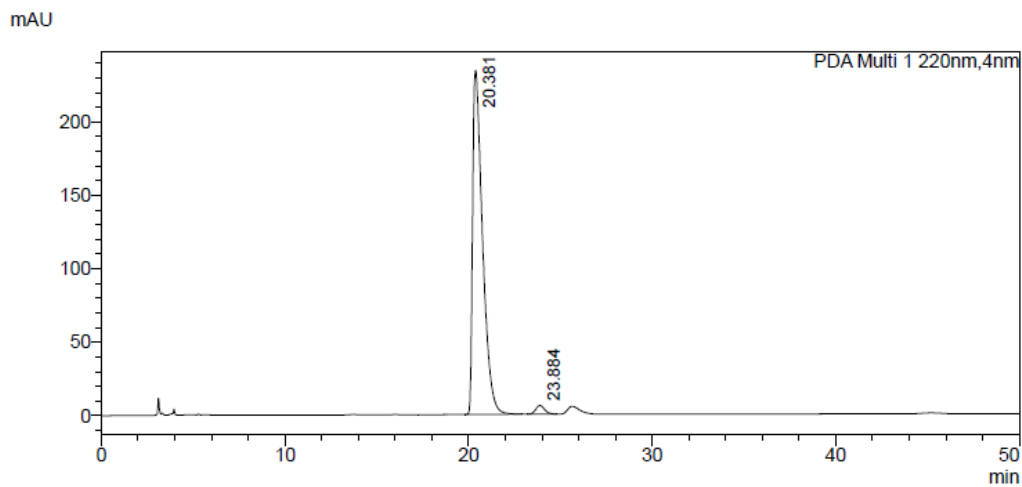

<Peak Table>

| PDA Ch1 220nm |           |         |        |         |
|---------------|-----------|---------|--------|---------|
| Peak#         | Ret. Time | Area    | Height | Area%   |
| 1             | 20.381    | 8776234 | 234197 | 97.830  |
| 2             | 23.884    | 194647  | 5859   | 2.170   |
| Total         |           | 8970880 | 240056 | 100.000 |

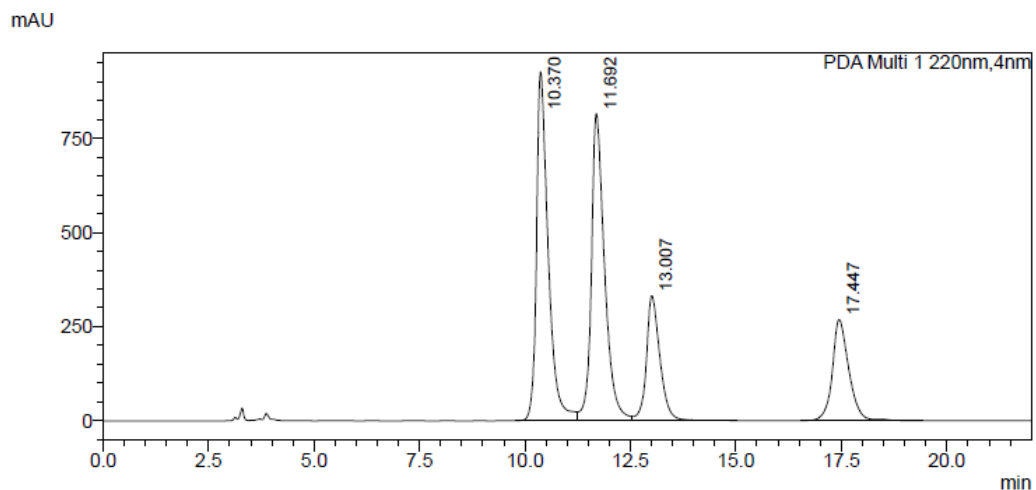

<Peak Table>

| PDA Ch1 220nm |           |          |         |         |
|---------------|-----------|----------|---------|---------|
| Peak#         | Ret. Time | Area     | Height  | Area%   |
| 1             | 10.370    | 17868381 | 926804  | 35.525  |
| 2             | 11.692    | 17748722 | 815199  | 35.287  |
| 3             | 13.007    | 7378834  | 331548  | 14.670  |
| 4             | 17.447    | 7301871  | 268400  | 14.517  |
| Total         |           | 50297809 | 2341952 | 100.000 |

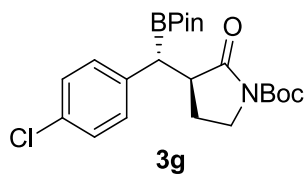

(IA column, IPA/hexanes: 2/98, flow rate 1.0 mL/min)

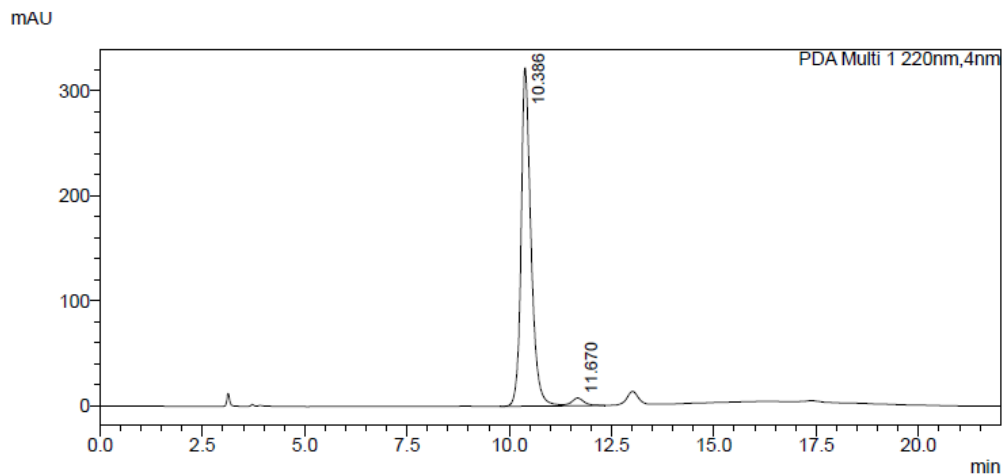

<Peak Table>

| PDA Ch1 220nm |           |         |        |         |
|---------------|-----------|---------|--------|---------|
| Peak#         | Ret. Time | Area    | Height | Area%   |
| 1             | 10.386    | 5397982 | 321868 | 97.201  |
| 2             | 11.670    | 155418  | 7286   | 2.799   |
| Total         |           | 5553401 | 329153 | 100.000 |

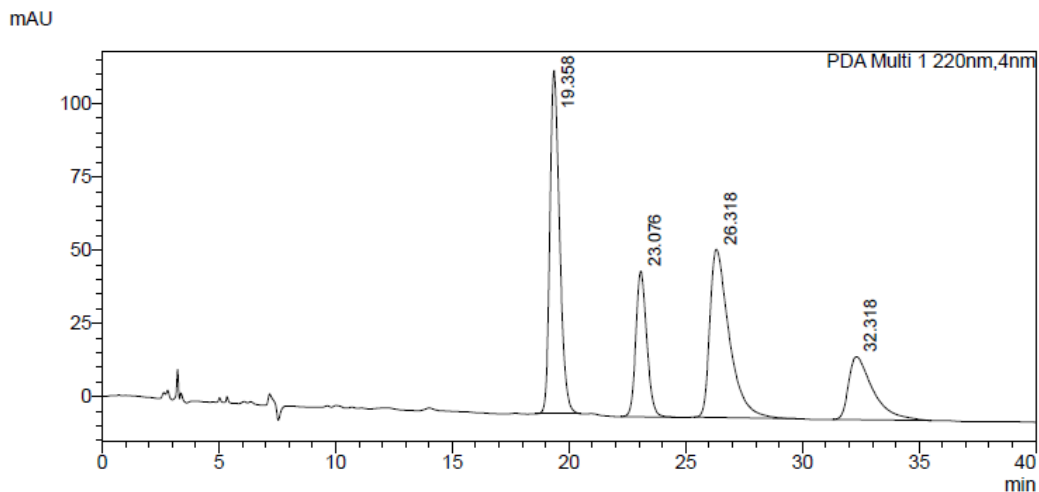

<Peak Table>

| PDA Ch1 220nm |           |         |        |         |
|---------------|-----------|---------|--------|---------|
| Peak#         | Ret. Time | Area    | Height | Area%   |
| 1             | 19.358    | 3383230 | 117139 | 34.238  |
| 2             | 23.076    | 1624034 | 49697  | 16.435  |
| 3             | 26.318    | 3318047 | 57377  | 33.579  |
| 4             | 32.318    | 1556086 | 21475  | 15.748  |
| Total         |           | 9881397 | 245687 | 100.000 |

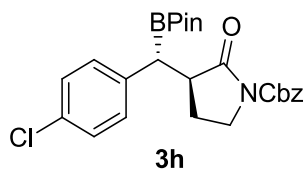

(IE column, IPA/hexanes: 10/90, flow rate 1.0 mL/min)

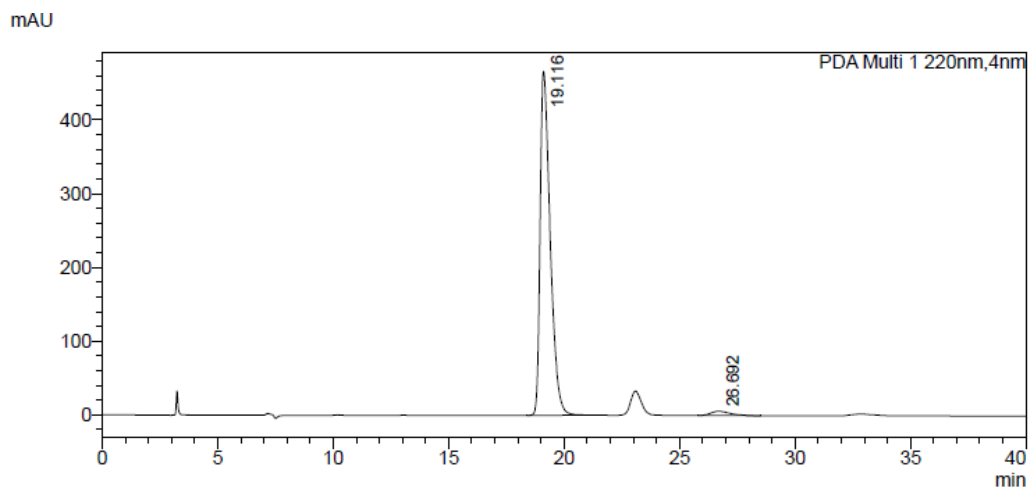

<Peak Table>

| PDA Ch1 220nm |           |          |        |         |
|---------------|-----------|----------|--------|---------|
| Peak#         | Ret. Time | Area     | Height | Area%   |
| 1             | 19.116    | 14158957 | 466292 | 97.687  |
| 2             | 26.692    | 335300   | 5789   | 2.313   |
| Total         |           | 14494257 | 472081 | 100.000 |

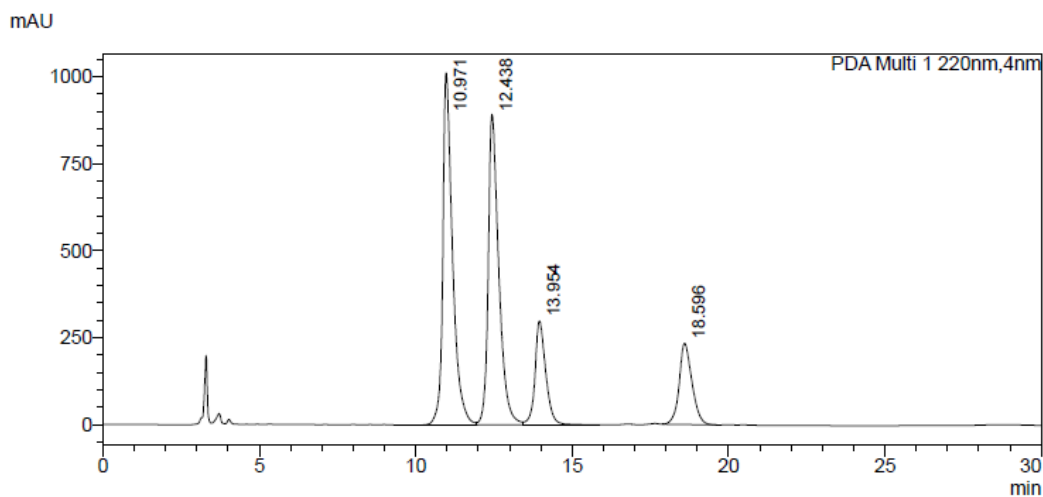

<Peak Table>

| PDA Ch1 220nm |           |          |         |         |
|---------------|-----------|----------|---------|---------|
| Peak#         | Ret. Time | Area     | Height  | Area%   |
| 1             | 10.971    | 21909971 | 1010422 | 38.675  |
| 2             | 12.438    | 20995333 | 892040  | 37.060  |
| 3             | 13.954    | 7137786  | 298044  | 12.599  |
| 4             | 18.596    | 6608779  | 233040  | 11.666  |
| Total         |           | 56651869 | 2433546 | 100.000 |

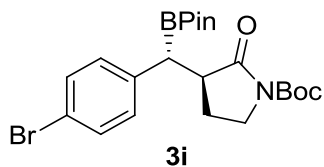

(IA column, IPA/hexanes: 2/98, flow rate 1.0 mL/min)

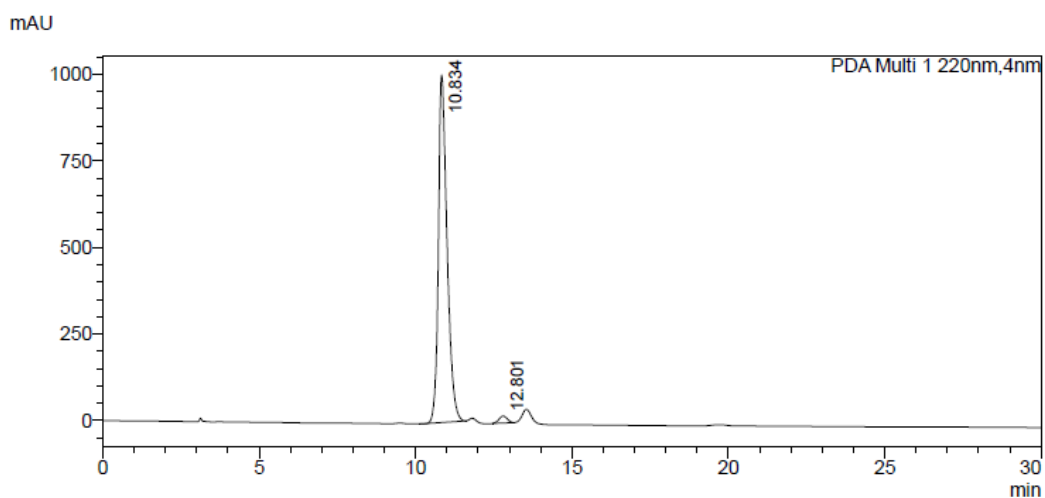

<Peak Table>

| PDA Ch1 220nm |           |          |         |         |
|---------------|-----------|----------|---------|---------|
| Peak#         | Ret. Time | Area     | Height  | Area%   |
| 1             | 10.834    | 19356955 | 1003352 | 98.133  |
| 2             | 12.801    | 368312   | 19948   | 1.867   |
| Total         |           | 19725267 | 1023300 | 100.000 |

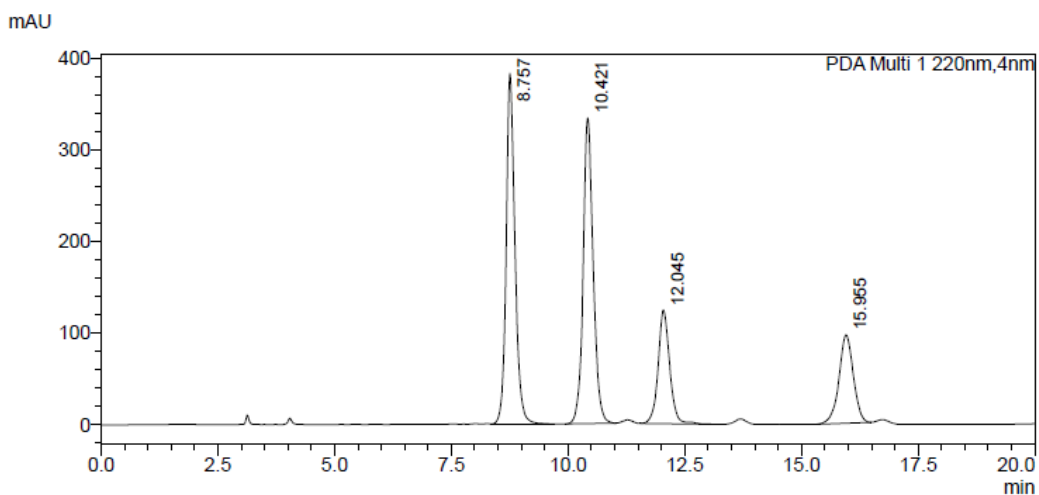

<Peak Table>

| PDA Ch1 220nm |           |          |        |         |
|---------------|-----------|----------|--------|---------|
| Peak#         | Ret. Time | Area     | Height | Area%   |
| 1             | 8.757     | 4995269  | 382214 | 35.255  |
| 2             | 10.421    | 4962151  | 333337 | 35.021  |
| 3             | 12.045    | 2142868  | 123838 | 15.124  |
| 4             | 15.955    | 2068720  | 96442  | 14.600  |
| Total         |           | 14169008 | 935831 | 100.000 |

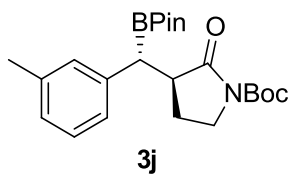

(IA column, IPA/hexanes: 2/98, flow rate 1.0 mL/min)

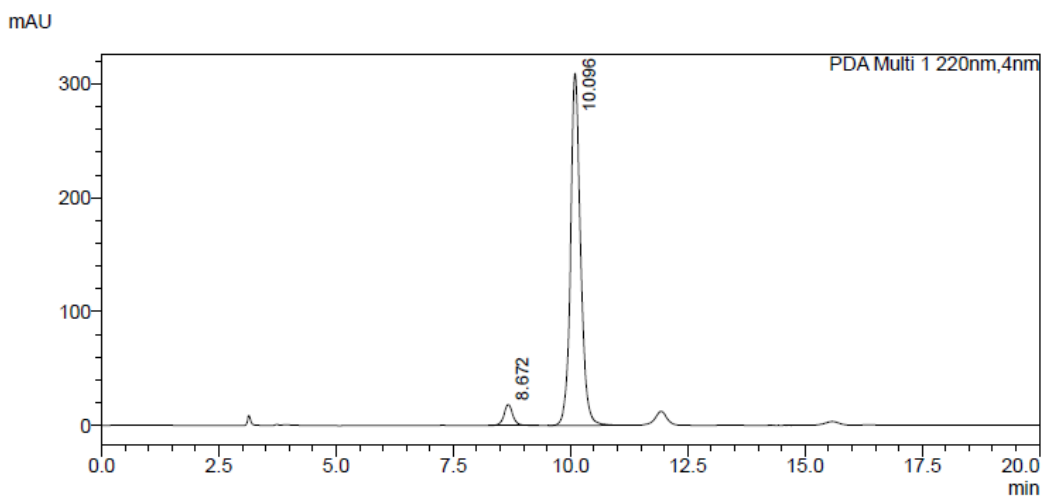

<Peak Table>

| PDA Ch1 220nm |           |         |        |         |
|---------------|-----------|---------|--------|---------|
| Peak#         | Ret. Time | Area    | Height | Area%   |
| 1             | 8.672     | 245637  | 18521  | 5.083   |
| 2             | 10.096    | 4586565 | 309411 | 94.917  |
| Total         |           | 4832202 | 327932 | 100.000 |

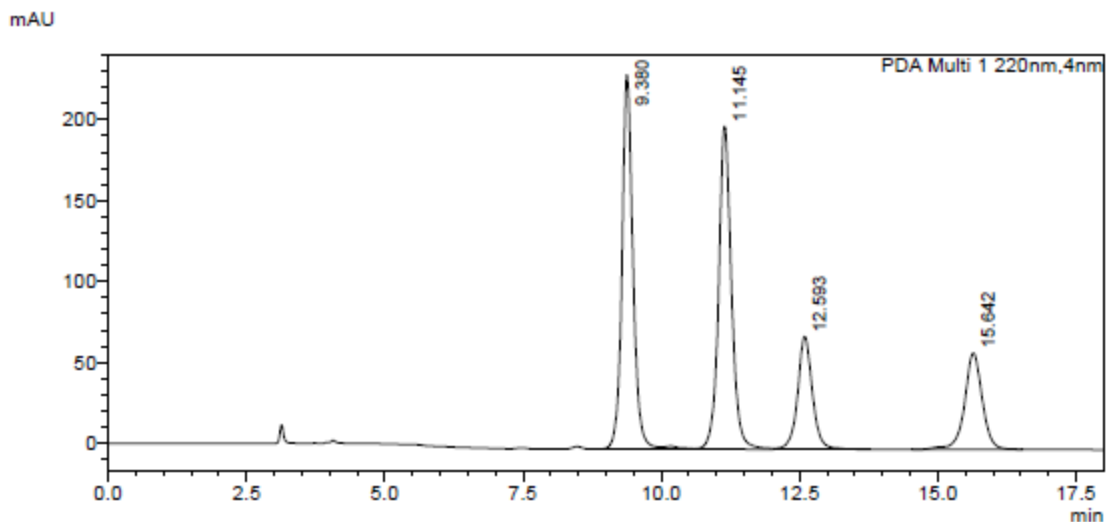

<Peak Table>

| PDA Ch1 220nm |           |         |        |         |
|---------------|-----------|---------|--------|---------|
| Peak#         | Ret. Time | Area    | Height | Area%   |
| 1             | 9.380     | 3206711 | 231121 | 35.438  |
| 2             | 11.145    | 3216546 | 199592 | 35.547  |
| 3             | 12.593    | 1295052 | 69671  | 14.312  |
| 4             | 15.642    | 1330492 | 59504  | 14.704  |
| Total         |           | 9048801 | 559888 | 100.000 |

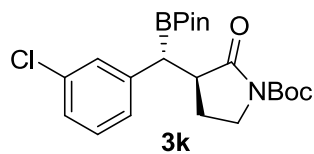

(IA column, IPA/hexanes: 2/98, flow rate 1.0 mL/min)

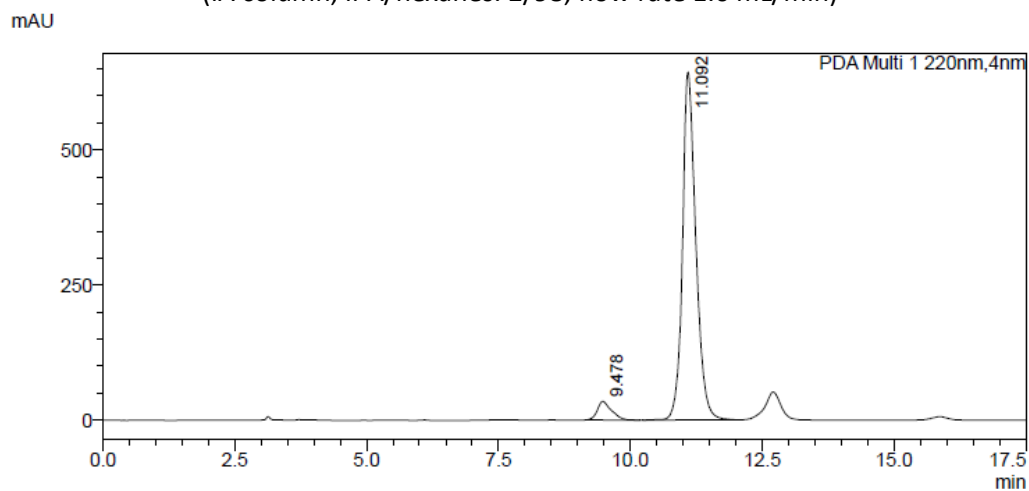

<Peak Table>

| PDA Ch1 220nm |           |          |        |         |
|---------------|-----------|----------|--------|---------|
| Peak#         | Ret. Time | Area     | Height | Area%   |
| 1             | 9.478     | 642334   | 34542  | 5.363   |
| 2             | 11.092    | 11334838 | 642904 | 94.637  |
| Total         |           | 11977172 | 677446 | 100.000 |

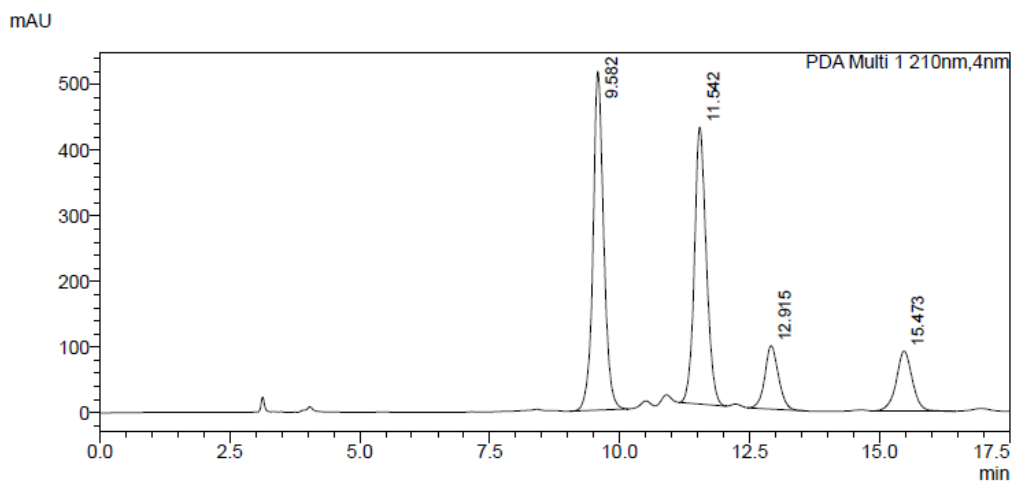

<Peak Table>

| PDA Ch1 210nm |           |          |         |         |
|---------------|-----------|----------|---------|---------|
| Peak#         | Ret. Time | Area     | Height  | Area%   |
| 1             | 9.582     | 7396395  | 516120  | 41.431  |
| 2             | 11.542    | 6736726  | 421940  | 37.736  |
| 3             | 12.915    | 1762245  | 96339   | 9.871   |
| 4             | 15.473    | 1957042  | 91342   | 10.962  |
| Total         |           | 17852407 | 1125741 | 100.000 |

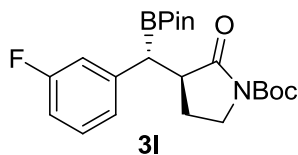

(IA column, IPA/hexanes: 2/98, flow rate 1.0 mL/min)

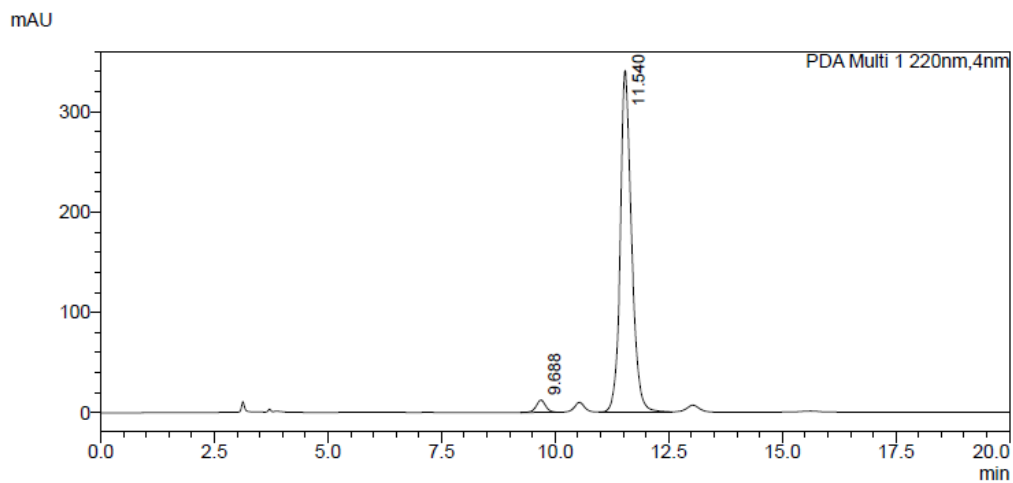

<Peak Table>

| PDA Ch1 220nm |           |         |        |         |
|---------------|-----------|---------|--------|---------|
| Peak#         | Ret. Time | Area    | Height | Area%   |
| 1             | 9.688     | 175243  | 12227  | 2.900   |
| 2             | 11.540    | 5867082 | 340194 | 97.100  |
| Total         |           | 6042326 | 352421 | 100.000 |



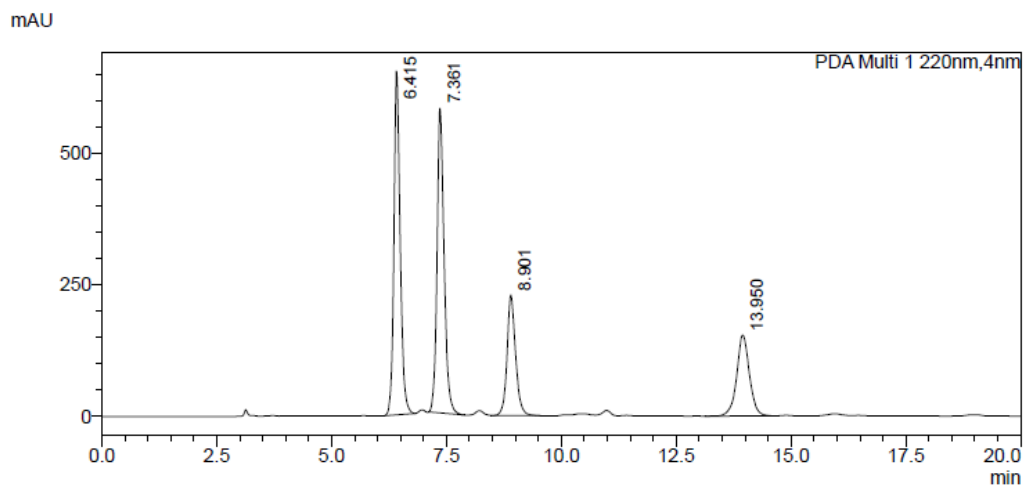

<Peak Table>

| Peak# | Ret. Time | Area     | Height  | Area%   |
|-------|-----------|----------|---------|---------|
| 1     | 6.415     | 6217100  | 653482  | 33.956  |
| 2     | 7.361     | 6194409  | 579307  | 33.832  |
| 3     | 8.901     | 2958053  | 228981  | 16.156  |
| 4     | 13.950    | 2939815  | 153746  | 16.056  |
| Total |           | 18309377 | 1615515 | 100.000 |

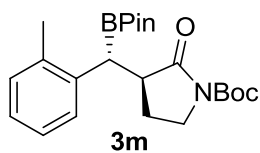

(IA column, IPA/hexanes: 2/98, flow rate 1.0 mL/min)

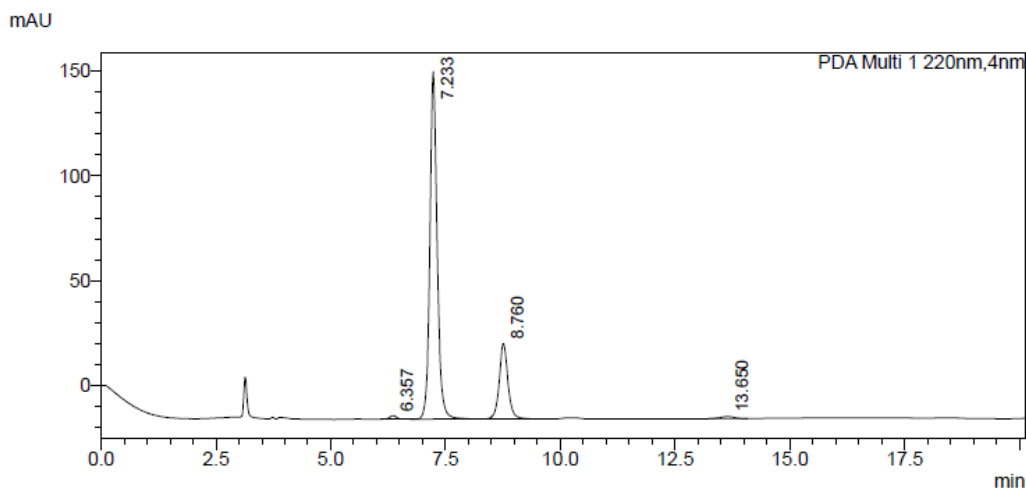

<Peak Table>

| Peak# | Ret. Time | Area    | Height | Area%   |
|-------|-----------|---------|--------|---------|
| 1     | 6.357     | 17838   | 1686   | 0.765   |
| 2     | 7.233     | 1824570 | 165544 | 78.217  |
| 3     | 8.760     | 470263  | 35890  | 20.160  |
| 4     | 13.650    | 20038   | 1012   | 0.859   |
| Total |           | 2332709 | 204132 | 100.000 |

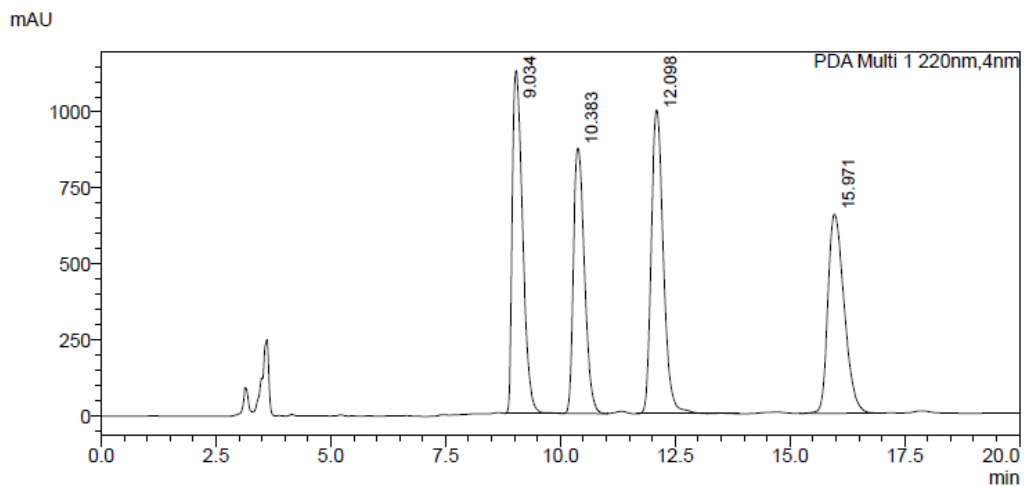

<Peak Table>

| PDA Ch1 220nm |           |          |         |         |
|---------------|-----------|----------|---------|---------|
| Peak#         | Ret. Time | Area     | Height  | Area%   |
| 1             | 9.034     | 17612347 | 1127657 | 26.409  |
| 2             | 10.383    | 14597270 | 873418  | 21.888  |
| 3             | 12.098    | 18324780 | 999736  | 27.477  |
| 4             | 15.971    | 16156457 | 654824  | 24.226  |
| Total         |           | 66690855 | 3655634 | 100.000 |

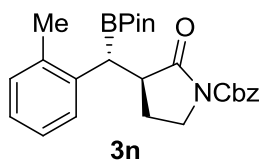

(AD-H column, IPA/hexanes: 5/95, flowrate 1.0 mL/min)

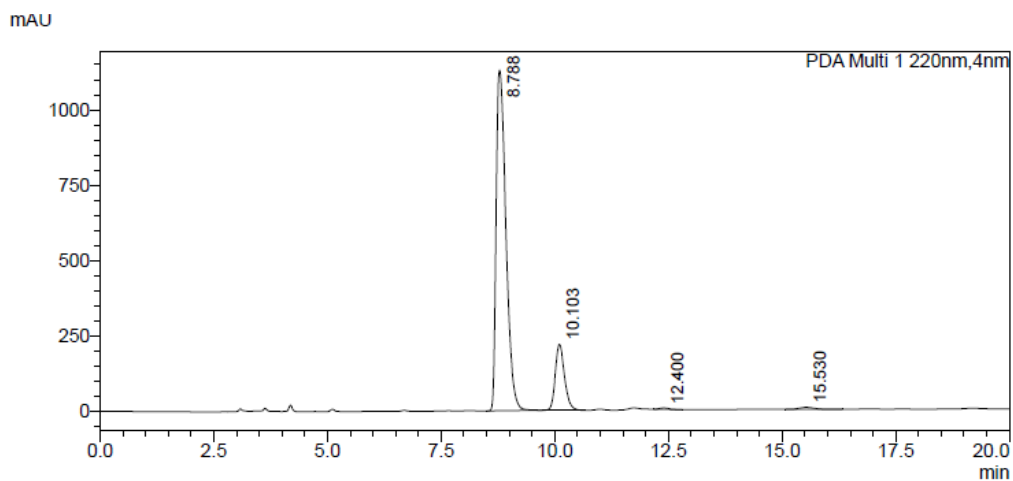

<Peak Table>

| PDA Ch1 220nm |           |          |         |         |
|---------------|-----------|----------|---------|---------|
| Peak#         | Ret. Time | Area     | Height  | Area%   |
| 1             | 8.788     | 16892729 | 1129458 | 83.751  |
| 2             | 10.103    | 3064038  | 218325  | 15.191  |
| 3             | 12.400    | 66313    | 4755    | 0.329   |
| 4             | 15.530    | 147062   | 6995    | 0.729   |
| Total         |           | 20170142 | 1359533 | 100.000 |

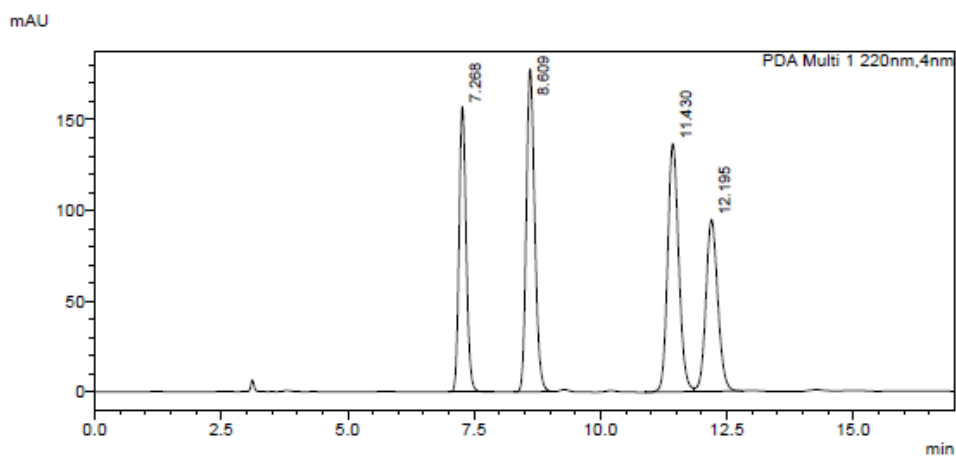

<Peak Table>

| PDA Ch1 220nm |           |         |        |         |
|---------------|-----------|---------|--------|---------|
| Peak#         | Ret. Time | Area    | Height | Area%   |
| 1             | 7.268     | 1538005 | 157337 | 21.261  |
| 2             | 8.609     | 2063672 | 178103 | 28.528  |
| 3             | 11.430    | 2081169 | 136784 | 28.770  |
| 4             | 12.195    | 1551055 | 94680  | 21.441  |
| Total         |           | 7233900 | 566904 | 100.000 |

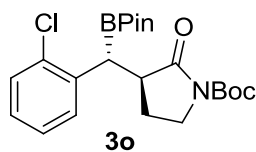

(AD-H column, IPA/hexanes: 2/98, flow rate 1.0 mL/min)

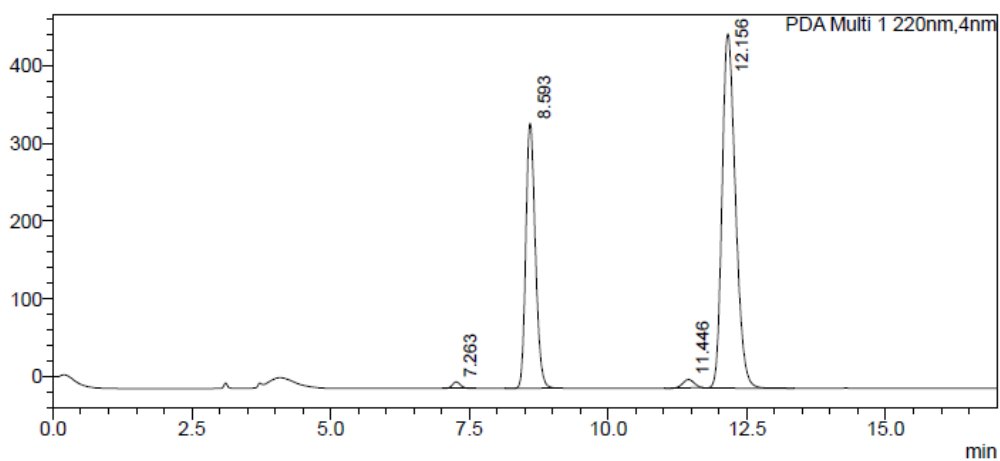

<Peak Table>

| PDA Ch1 220nm |           |          |        |         |
|---------------|-----------|----------|--------|---------|
| Peak#         | Ret. Time | Area     | Height | Area%   |
| 1             | 7.263     | 83897    | 8405   | 0.701   |
| 2             | 8.593     | 4061547  | 341273 | 33.943  |
| 3             | 11.446    | 152984   | 10731  | 1.279   |
| 4             | 12.156    | 7667329  | 456021 | 64.077  |
| Total         |           | 11965758 | 816430 | 100.000 |

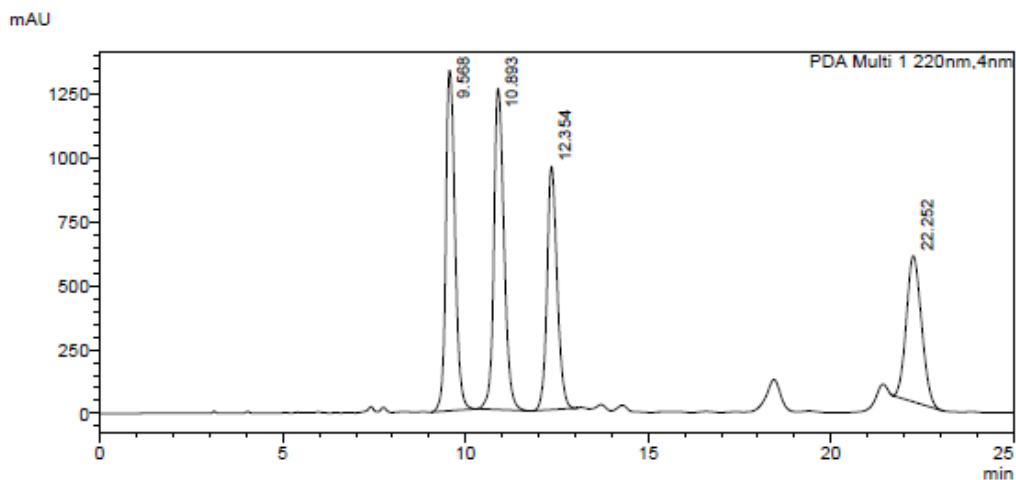

<Peak Table>

| PDA Ch1 220nm |           |          |         |         |
|---------------|-----------|----------|---------|---------|
| Peak#         | Ret. Time | Area     | Height  | Area%   |
| 1             | 9.568     | 23288198 | 1334429 | 28.231  |
| 2             | 10.893    | 24337071 | 1257840 | 29.503  |
| 3             | 12.354    | 18300917 | 953056  | 22.185  |
| 4             | 22.252    | 16564351 | 571990  | 20.080  |
| Total         |           | 82490537 | 4117315 | 100.000 |

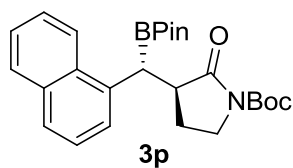

(IA column, IPA/hexanes: 2/98, flow rate 1.0 mL/min)

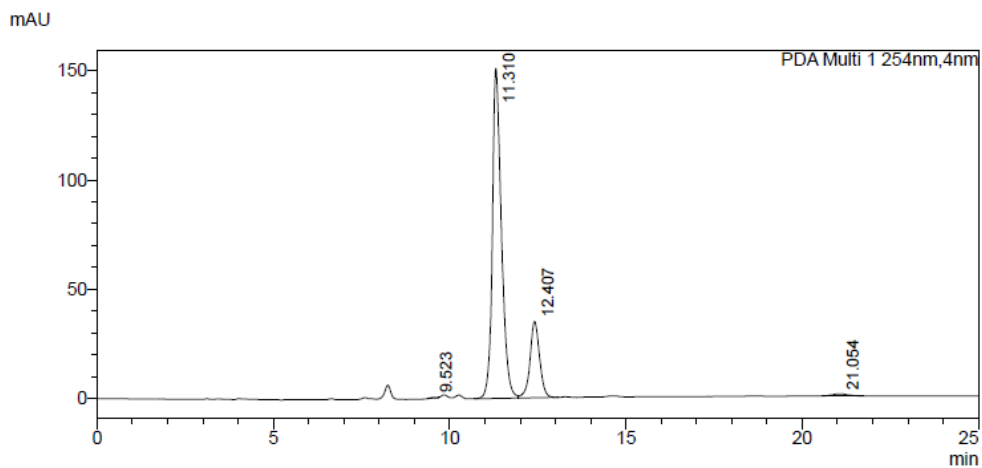

<Peak Table>

| PDA Ch1 254nm |           |         |        |         |
|---------------|-----------|---------|--------|---------|
| Peak#         | Ret. Time | Area    | Height | Area%   |
| 1             | 9.523     | 2245    | 320    | 0.067   |
| 2             | 11.310    | 2685279 | 150842 | 79.618  |
| 3             | 12.407    | 657987  | 34879  | 19.509  |
| 4             | 21.054    | 27172   | 950    | 0.806   |
| Total         |           | 3372683 | 186991 | 100.000 |

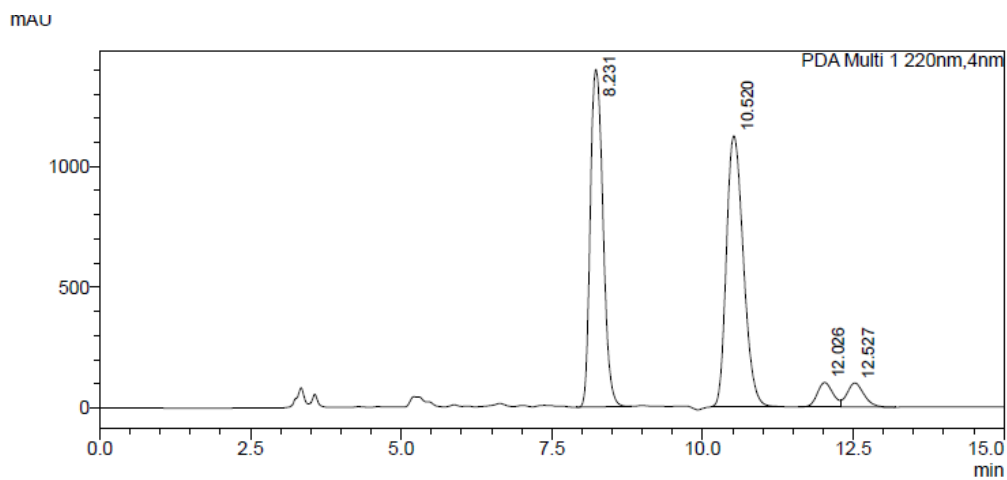

<Peak Table>

| PDA Ch1 220nm |           |          |         |         |
|---------------|-----------|----------|---------|---------|
| Peak#         | Ret. Time | Area     | Height  | Area%   |
| 1             | 8.231     | 20479446 | 1397310 | 44.339  |
| 2             | 10.520    | 21953566 | 1121137 | 47.531  |
| 3             | 12.026    | 1820140  | 101129  | 3.941   |
| 4             | 12.527    | 1935135  | 99374   | 4.190   |
| Total         |           | 46188286 | 2718950 | 100.000 |

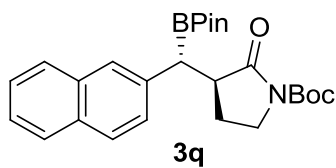

(IC column, IPA/hexanes: 10/90, flow rate 1.0 mL/min)

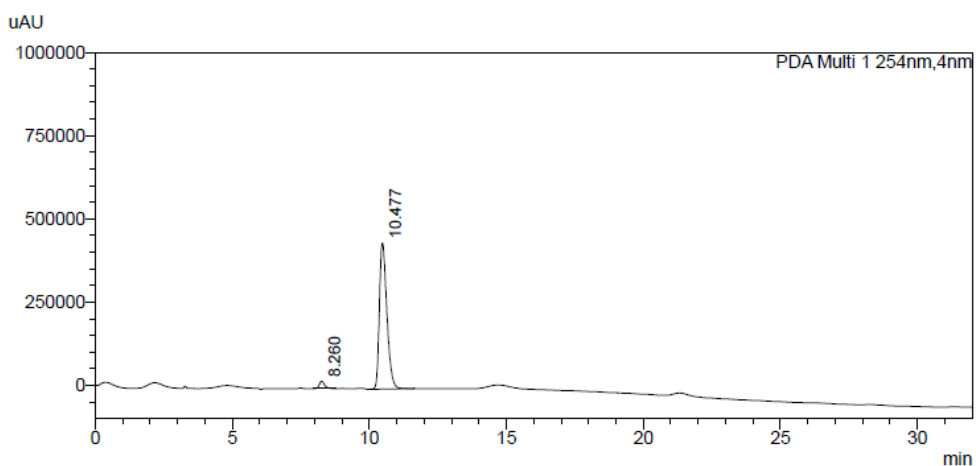

<Peak Table>

| PDA Ch1 254nm |           |         |        |         |
|---------------|-----------|---------|--------|---------|
| Peak#         | Ret. Time | Area    | Height | Area%   |
| 1             | 8.260     | 294624  | 21994  | 3.416   |
| 2             | 10.477    | 8331210 | 438928 | 96.584  |
| Total         |           | 8625834 | 460922 | 100.000 |

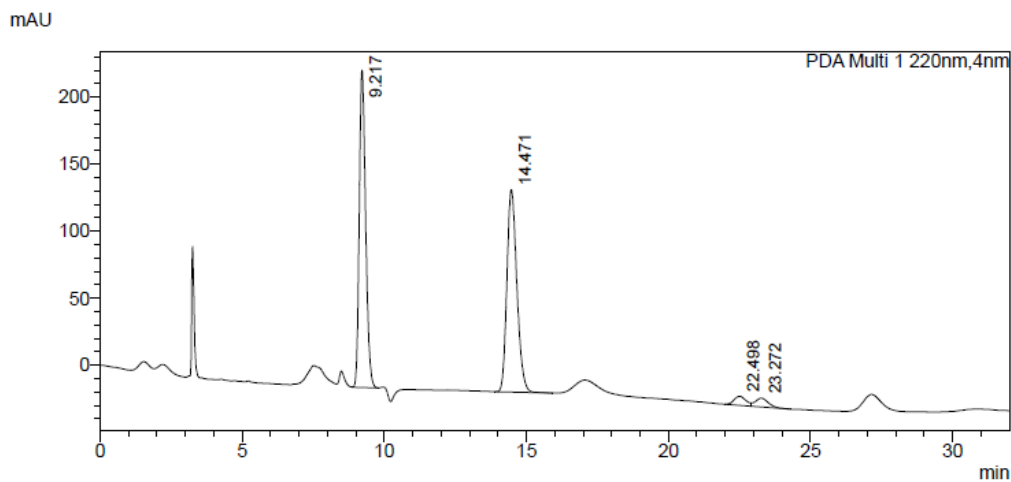

<Peak Table>

| PDA Ch1 220nm |           |         |        |         |
|---------------|-----------|---------|--------|---------|
| Peak#         | Ret. Time | Area    | Height | Area%   |
| 1             | 9.217     | 3685283 | 236677 | 47.436  |
| 2             | 14.471    | 3679810 | 150976 | 47.366  |
| 3             | 22.498    | 199002  | 6746   | 2.562   |
| 4             | 23.272    | 204847  | 6510   | 2.637   |
| Total         |           | 7768942 | 400909 | 100.000 |

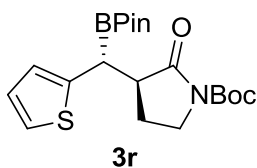

(IC column, IPA/hexanes: 10/90, flow rate 1.0 mL/min)

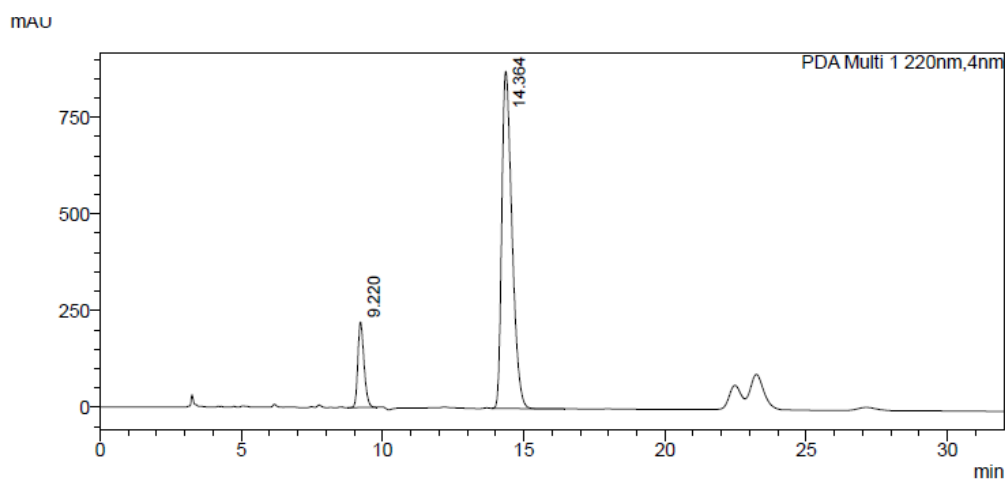

<Peak Table>

| PDA Ch1 220nm |           |          |         |         |
|---------------|-----------|----------|---------|---------|
| Peak#         | Ret. Time | Area     | Height  | Area%   |
| 1             | 9.220     | 3364207  | 221163  | 13.296  |
| 2             | 14.364    | 21938308 | 872400  | 86.704  |
| Total         |           | 25302515 | 1093563 | 100.000 |

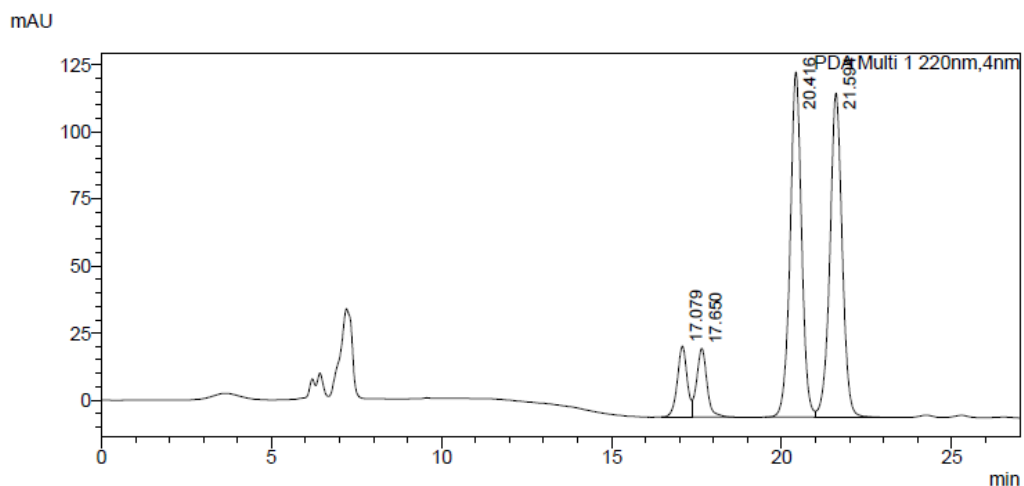

<Peak Table>

| PDA Ch1 220nm |           |         |        |         |
|---------------|-----------|---------|--------|---------|
| Peak#         | Ret. Time | Area    | Height | Area%   |
| 1             | 17.079    | 525959  | 26360  | 7.400   |
| 2             | 17.650    | 537295  | 25537  | 7.560   |
| 3             | 20.416    | 3016395 | 128585 | 42.441  |
| 4             | 21.594    | 3027673 | 120715 | 42.599  |
| Total         |           | 7107322 | 301198 | 100.000 |

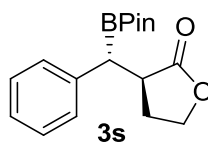

(IA column, IPA/hexanes: 3/97, flow rate 1.0 mL/min)

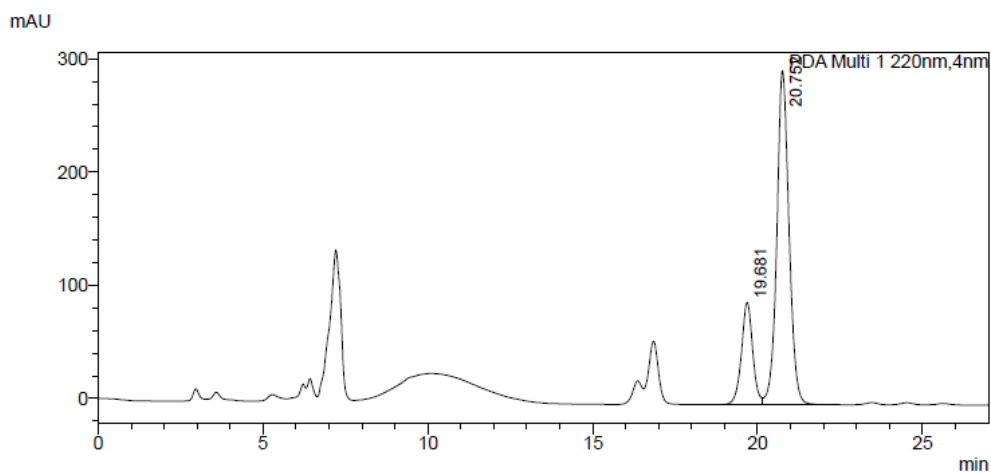

<Peak Table>

| PDA Ch1 220nm |           |         |        |         |
|---------------|-----------|---------|--------|---------|
| Peak#         | Ret. Time | Area    | Height | Area%   |
| 1             | 19.681    | 2149536 | 90325  | 22.084  |
| 2             | 20.752    | 7583853 | 294884 | 77.916  |
| Total         |           | 9733389 | 385209 | 100.000 |

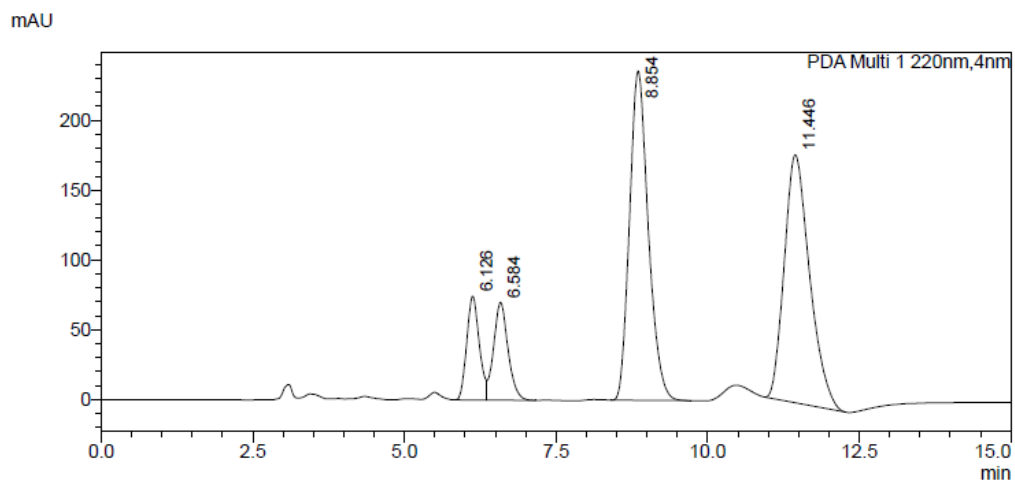

<Peak Table>

| PDA Ch1 220nm |           |          |        |         |
|---------------|-----------|----------|--------|---------|
| Peak#         | Ret. Time | Area     | Height | Area%   |
| 1             | 6.126     | 1075526  | 74444  | 8.610   |
| 2             | 6.584     | 1156764  | 70175  | 9.261   |
| 3             | 8.854     | 5086598  | 236043 | 40.722  |
| 4             | 11.446    | 5172110  | 177670 | 41.407  |
| Total         |           | 12490998 | 558331 | 100.000 |

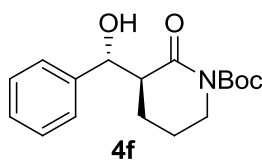

(OD-H column, IPA/hexanes: 10/90, flow rate 1.0 mL/min)

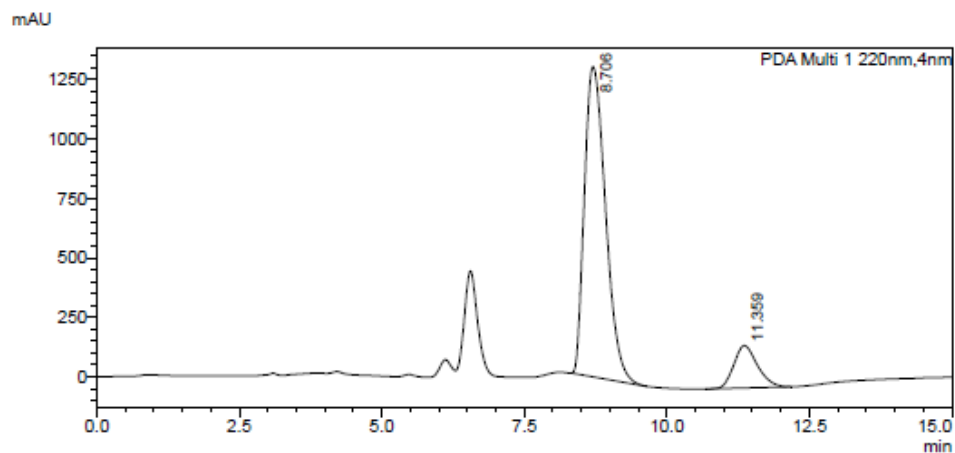

<Peak Table>

| PDA Ch1 220nm |           |          |         |         |
|---------------|-----------|----------|---------|---------|
| Peak#         | Ret. Time | Area     | Height  | Area%   |
| 1             | 8.706     | 33605376 | 1304078 | 86.720  |
| 2             | 11.359    | 5146291  | 178328  | 13.280  |
| Total         |           | 38751668 | 1482406 | 100.000 |



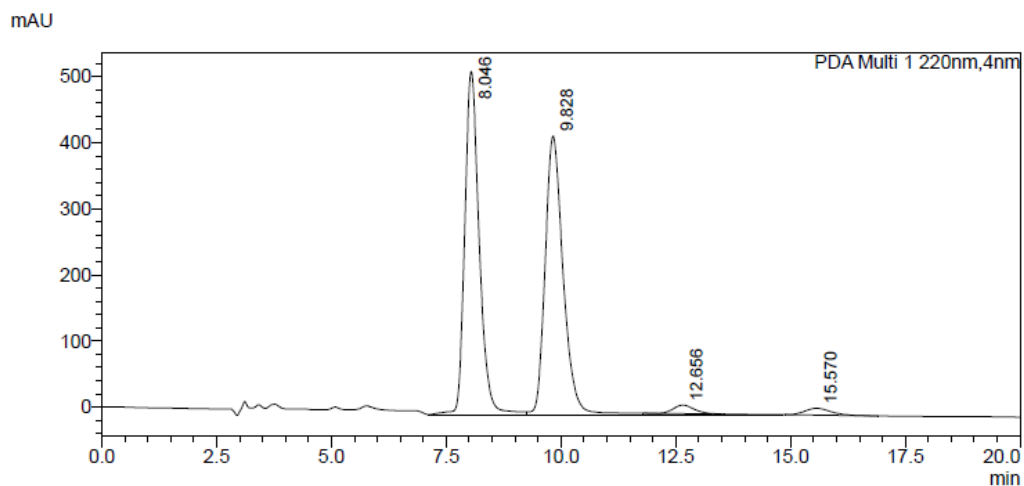

<Peak Table>

| PDA Ch1 220nm |           |          |        |         |
|---------------|-----------|----------|--------|---------|
| Peak#         | Ret. Time | Area     | Height | Area%   |
| 1             | 8.046     | 11418158 | 519116 | 47.622  |
| 2             | 9.828     | 11727827 | 421545 | 48.913  |
| 3             | 12.656    | 411789   | 12917  | 1.717   |
| 4             | 15.570    | 418976   | 10506  | 1.747   |
| Total         |           | 23976751 | 964084 | 100.000 |

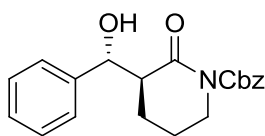

**4g**

(OD-H column, IPA/hexanes: 20/80, flow rate 1.0 mL/min)

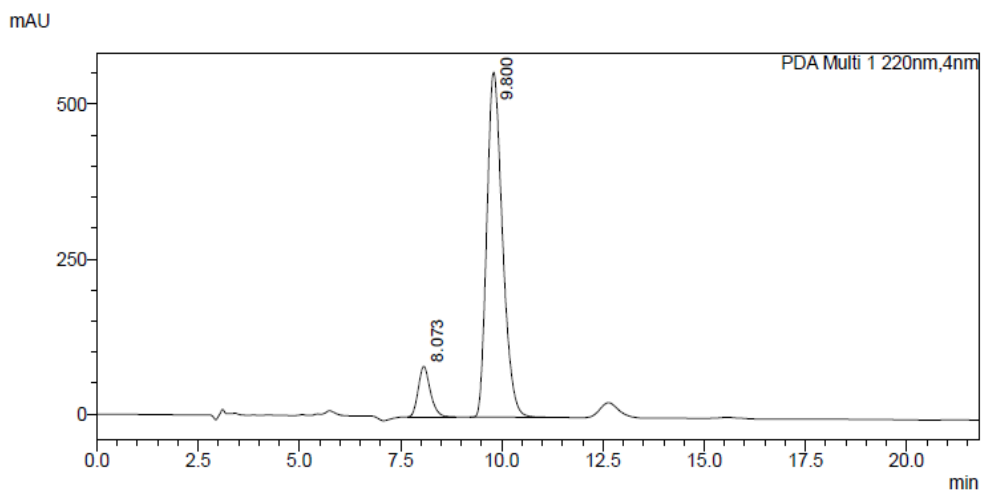

<Peak Table>

| PDA Ch1 220nm |           |          |        |         |
|---------------|-----------|----------|--------|---------|
| Peak#         | Ret. Time | Area     | Height | Area%   |
| 1             | 8.073     | 1677651  | 81569  | 10.097  |
| 2             | 9.800     | 14938168 | 556155 | 89.903  |
| Total         |           | 16615819 | 637724 | 100.000 |

# NMR Spectra

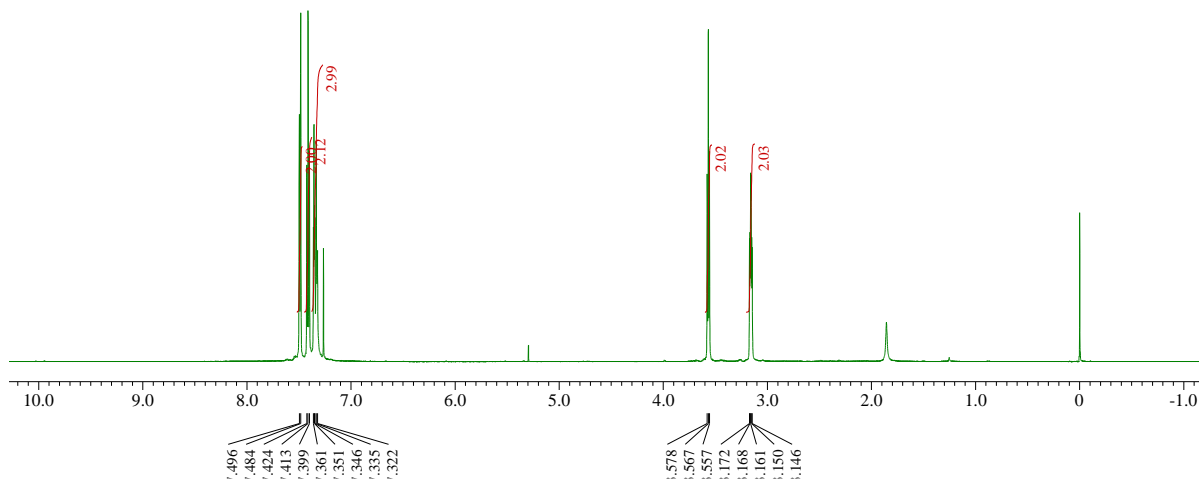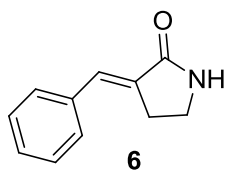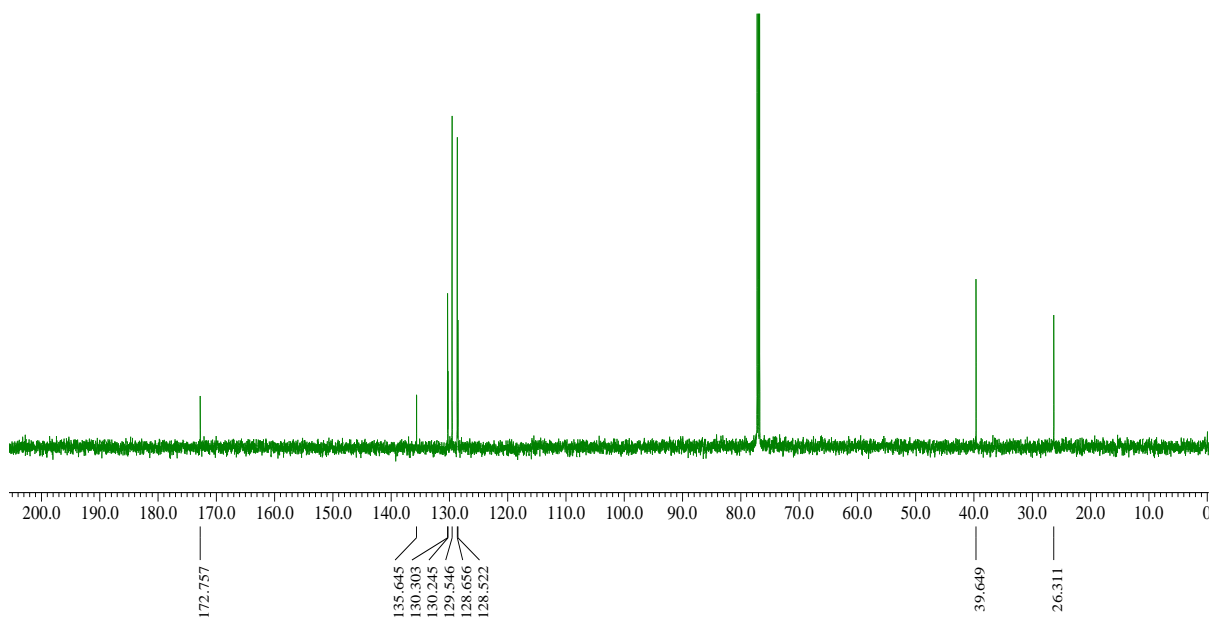

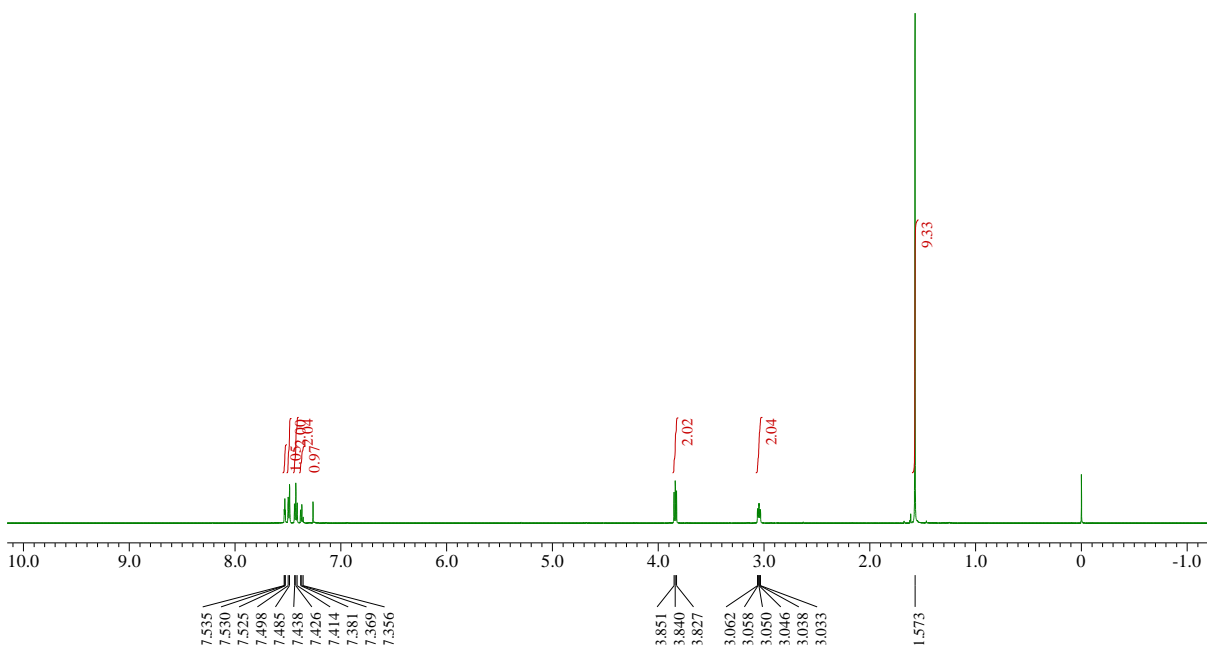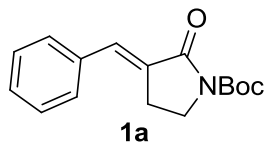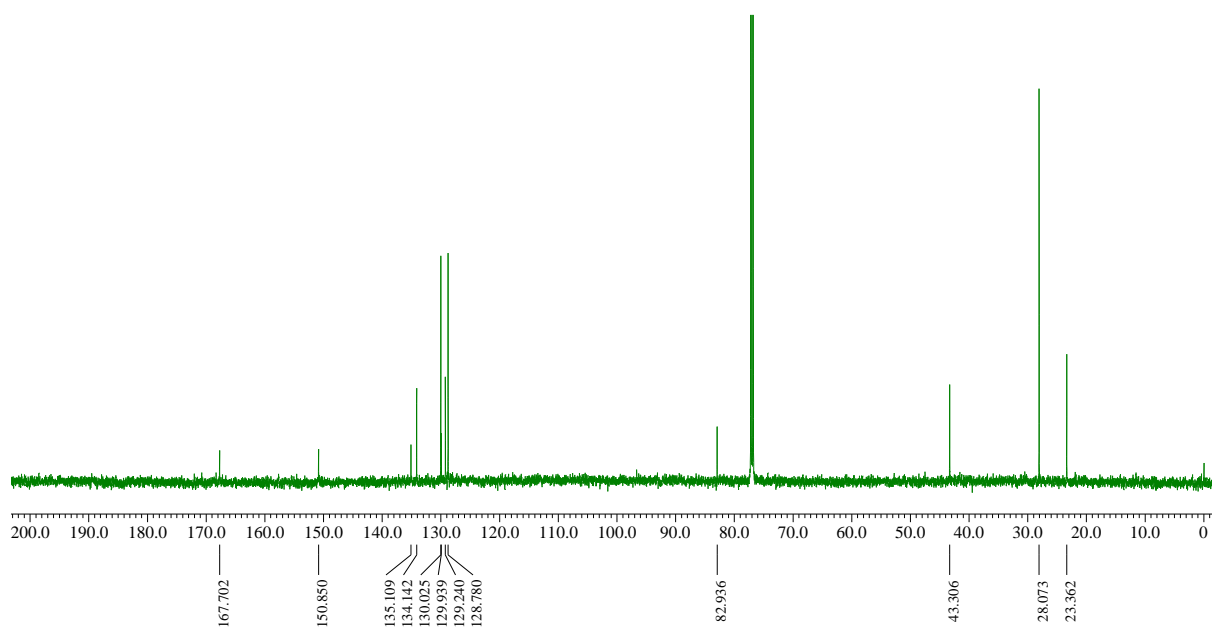

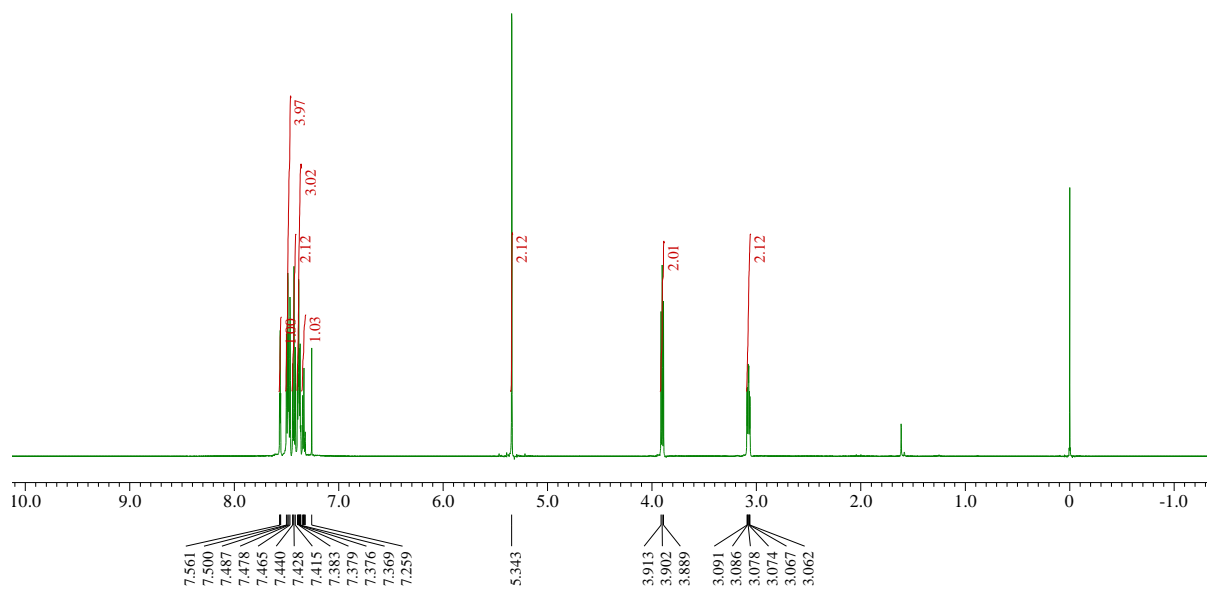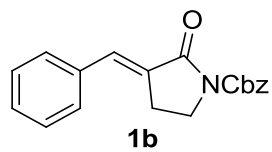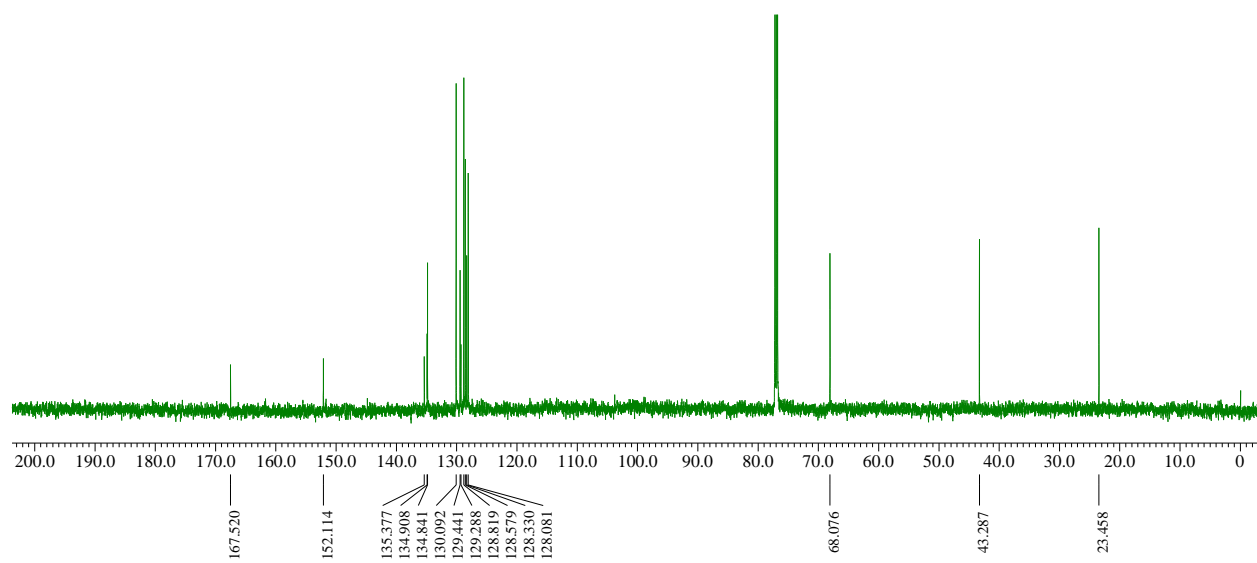

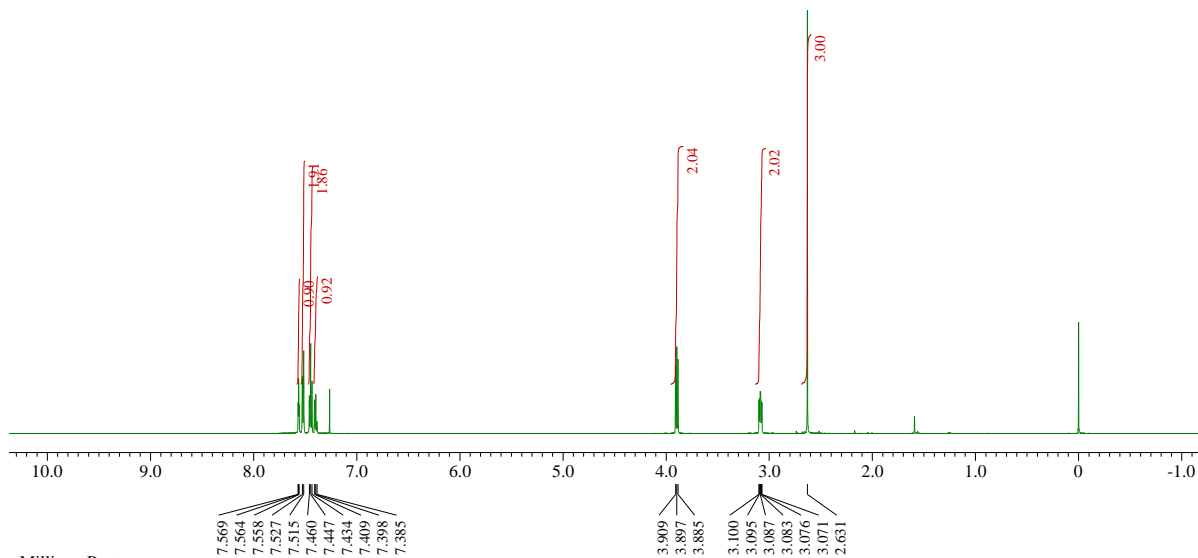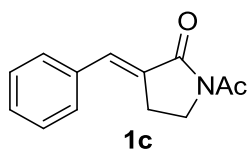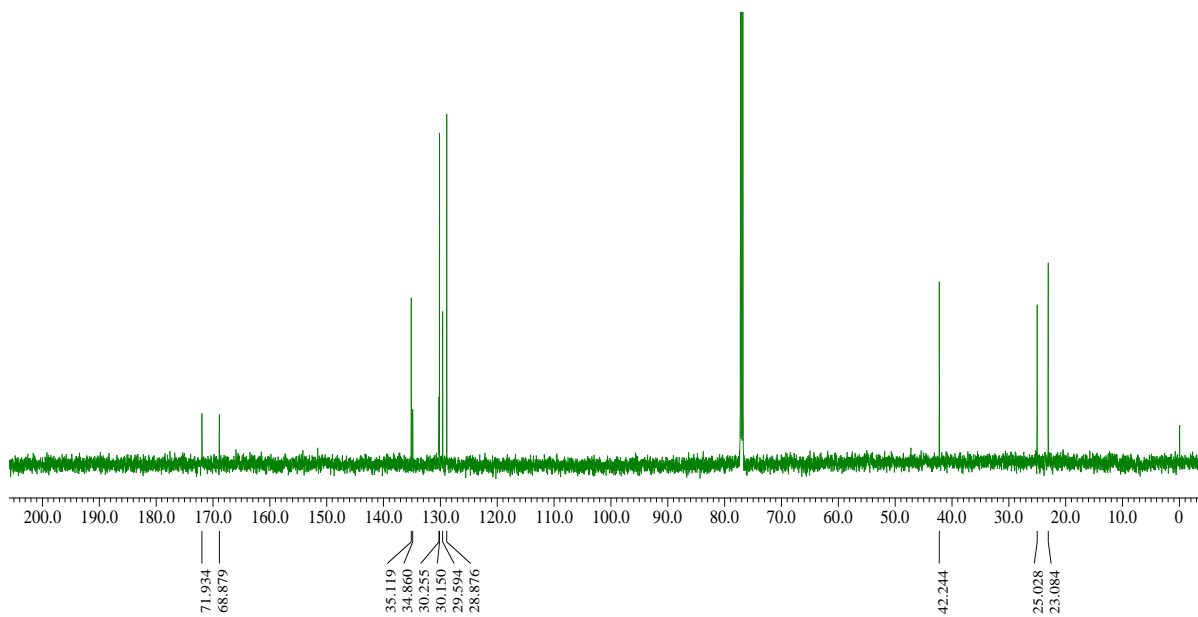

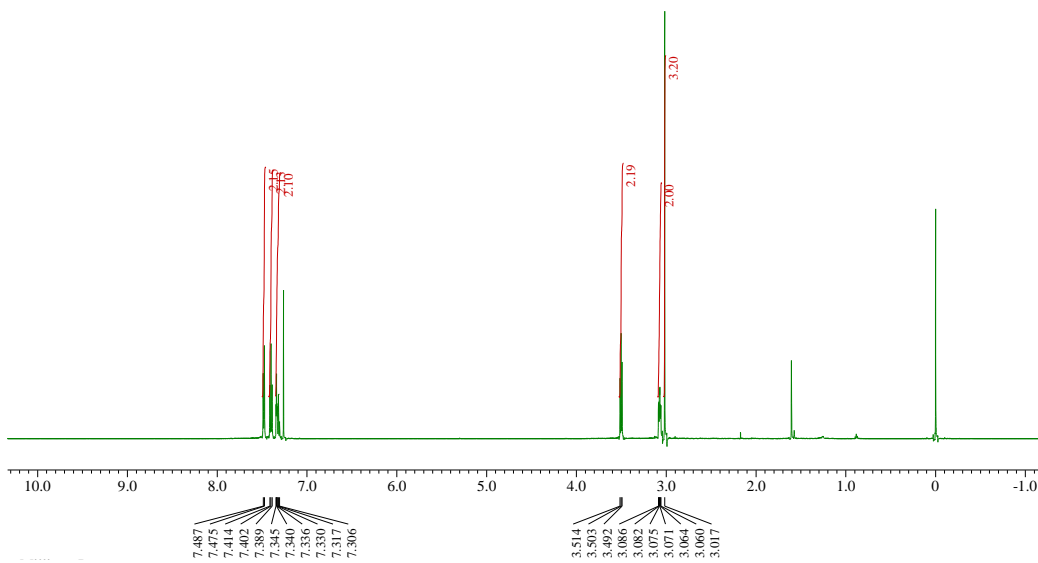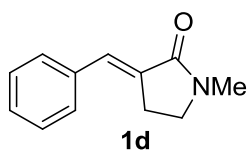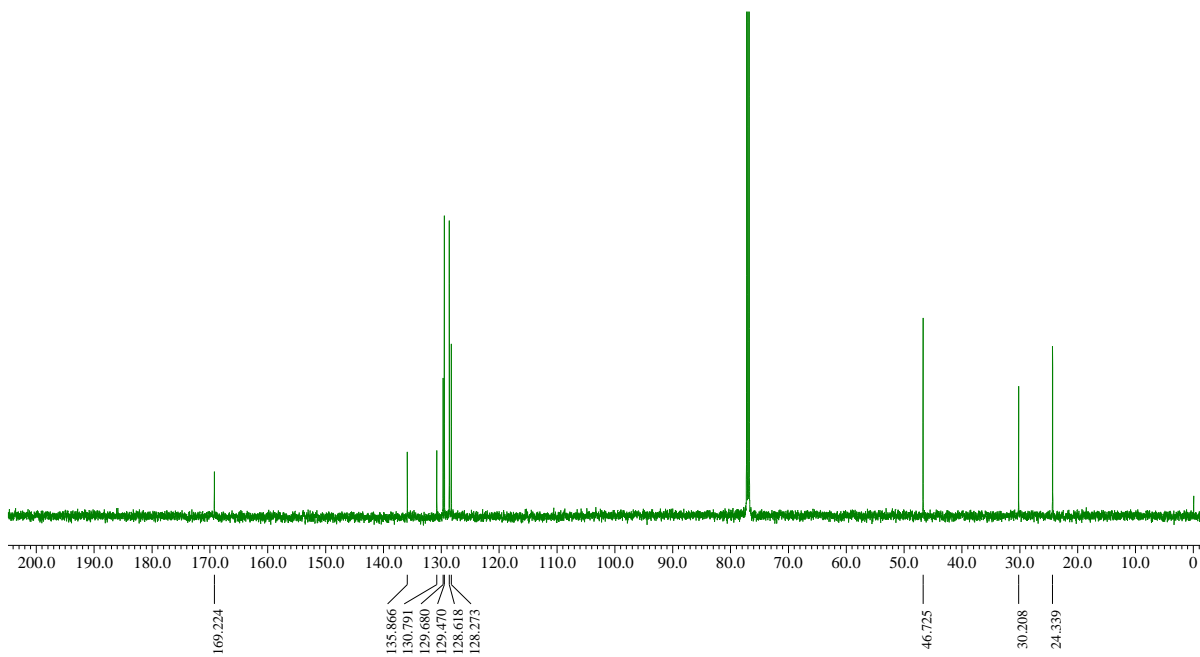

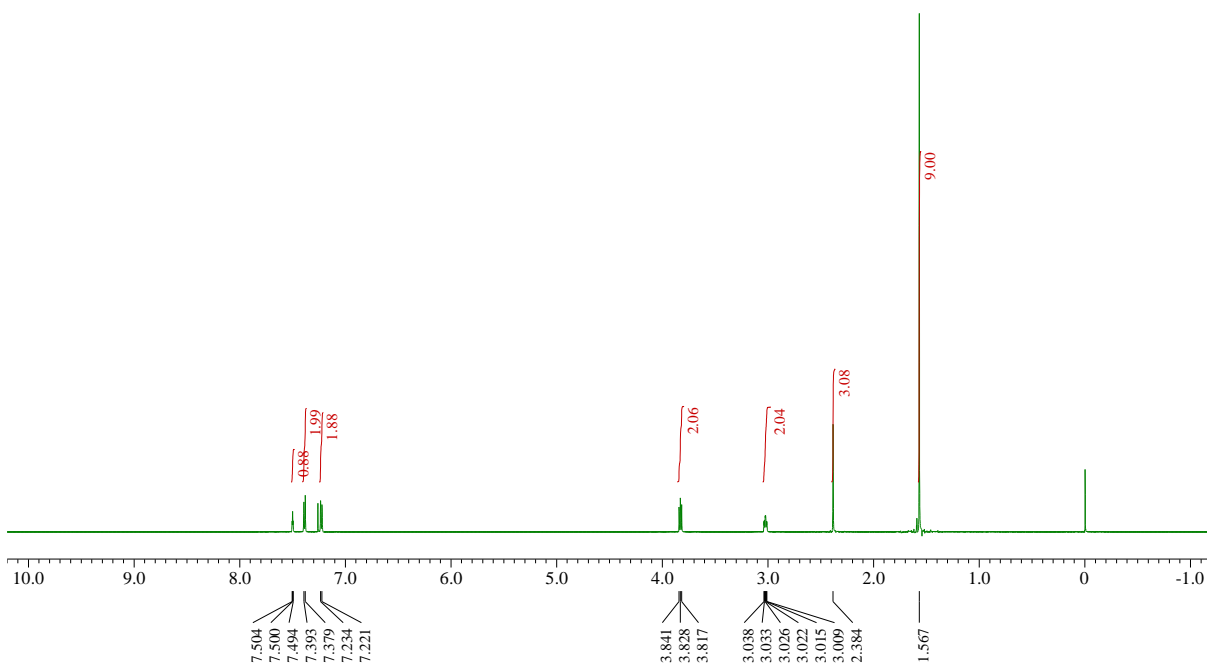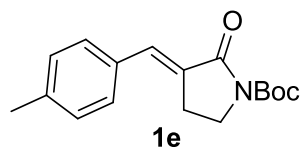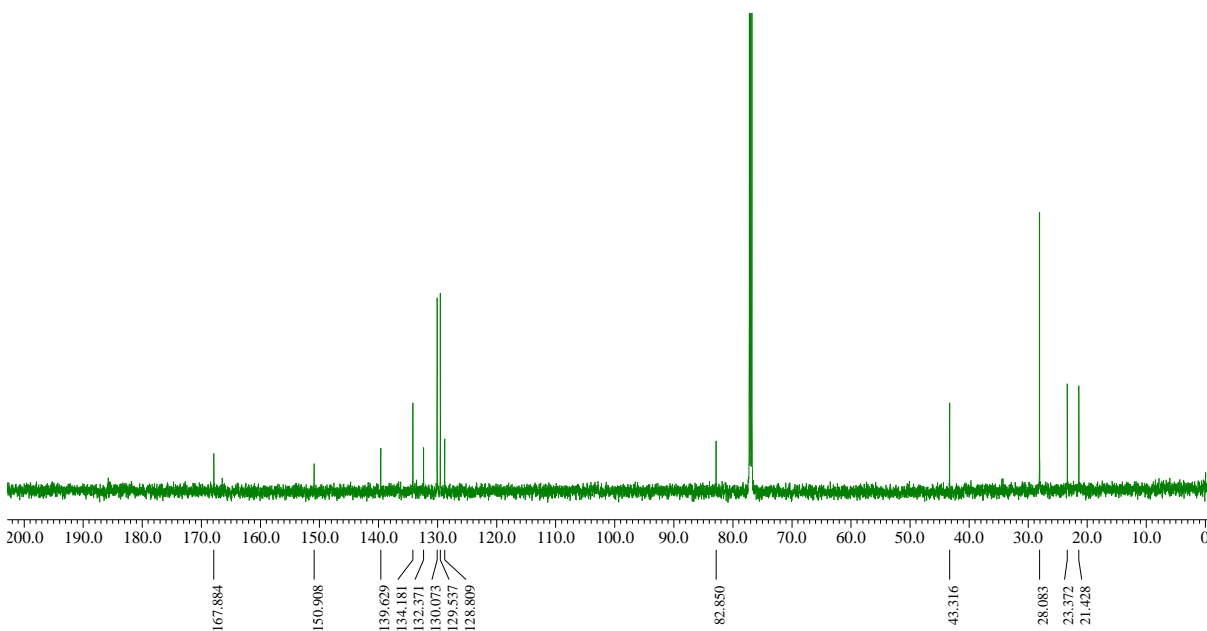

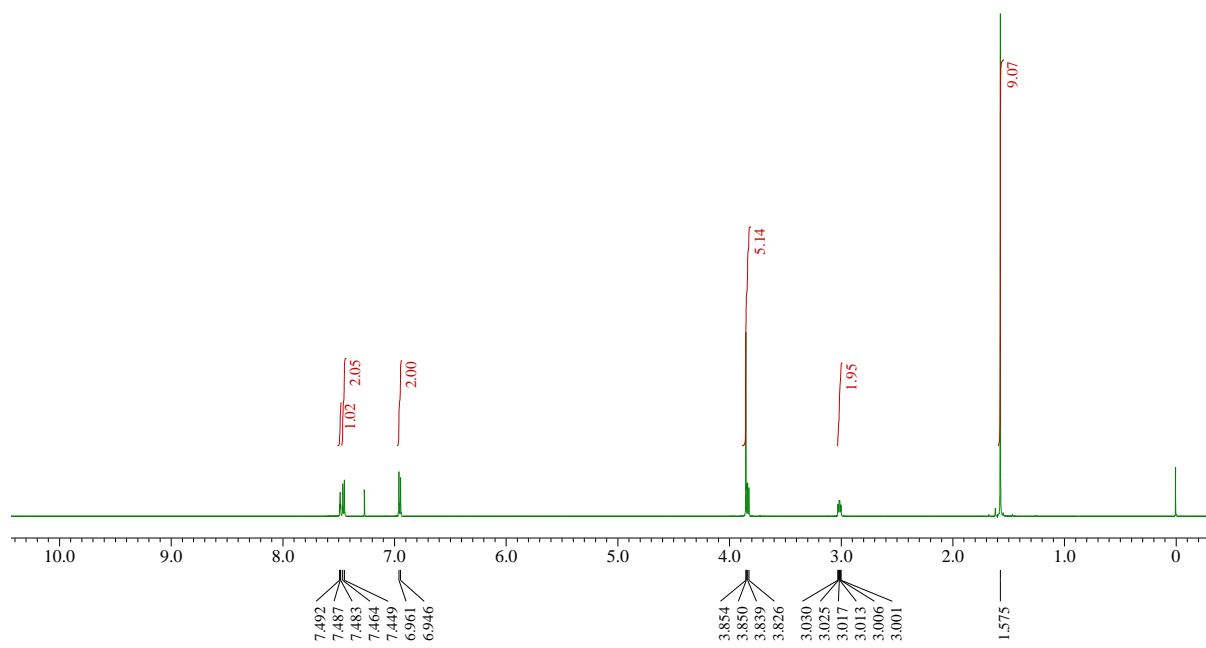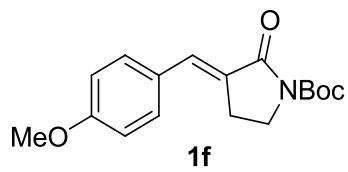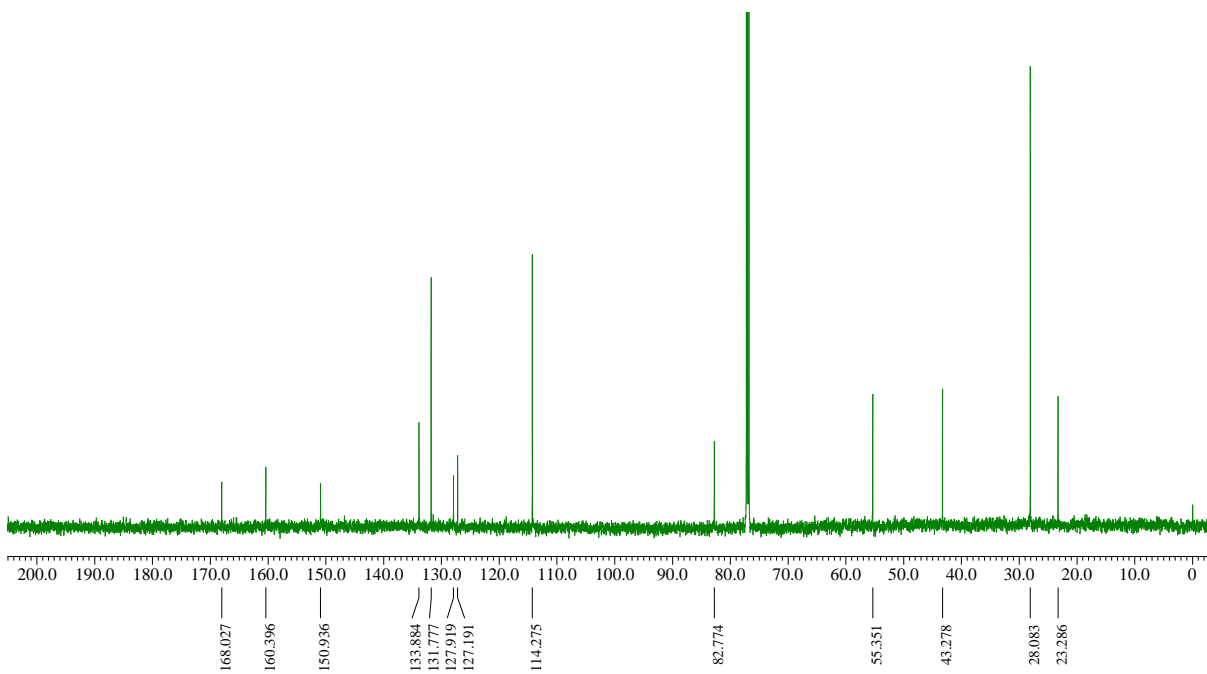



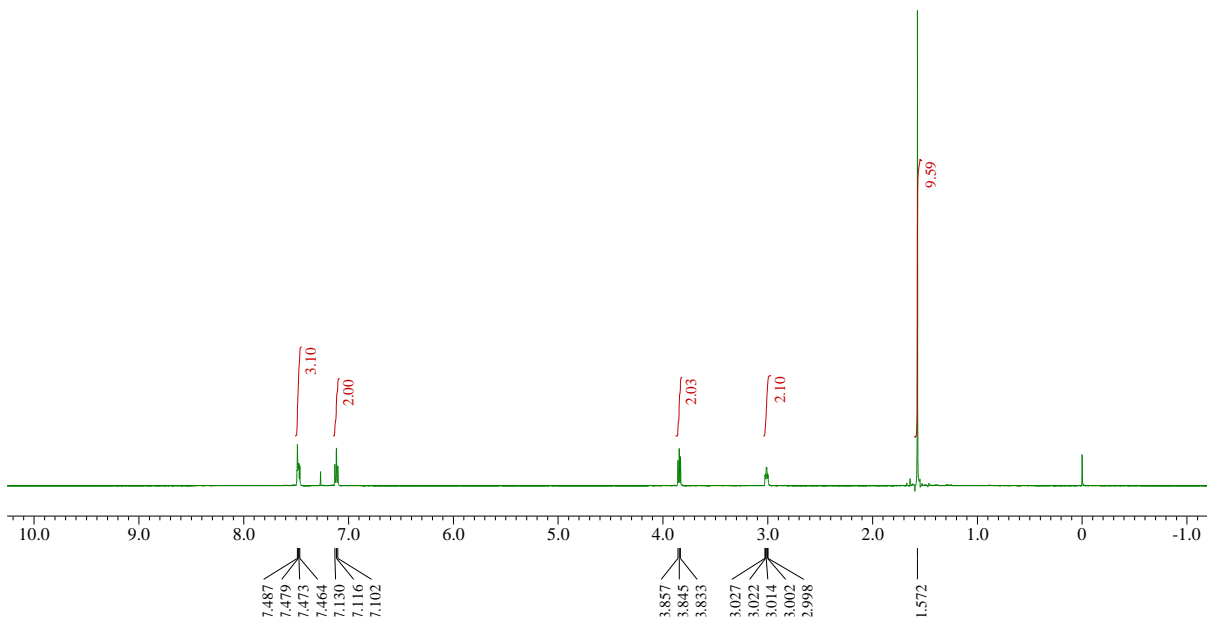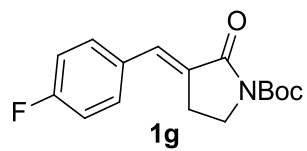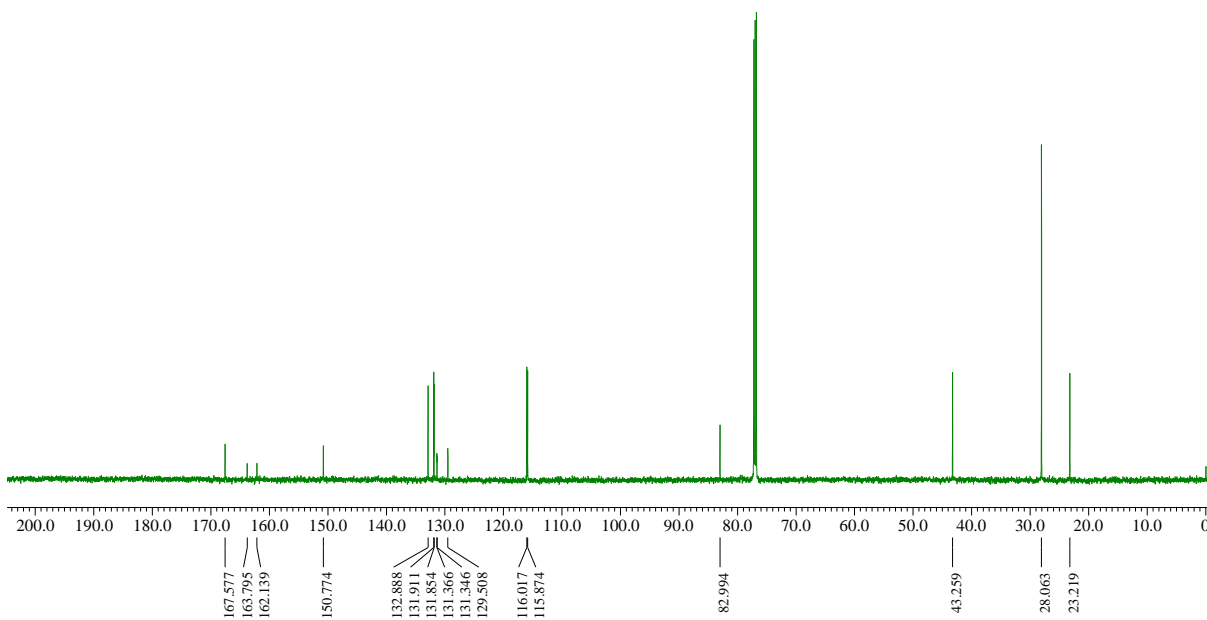

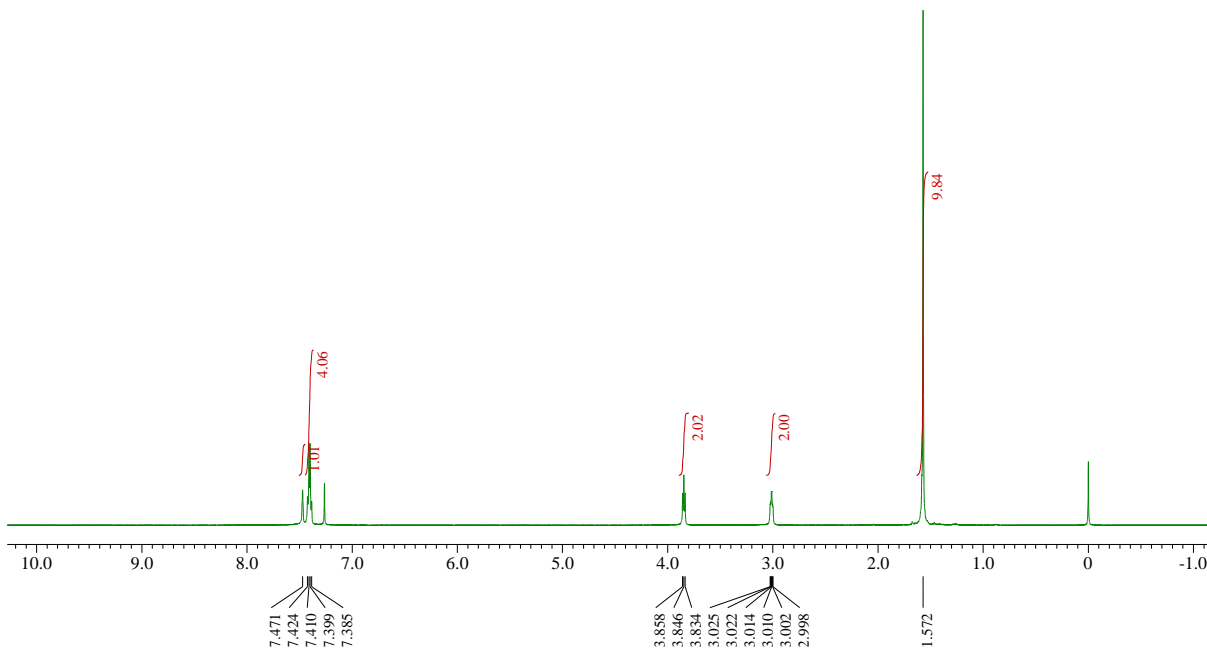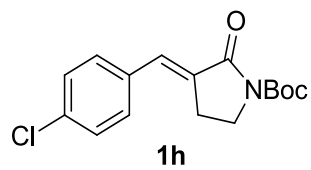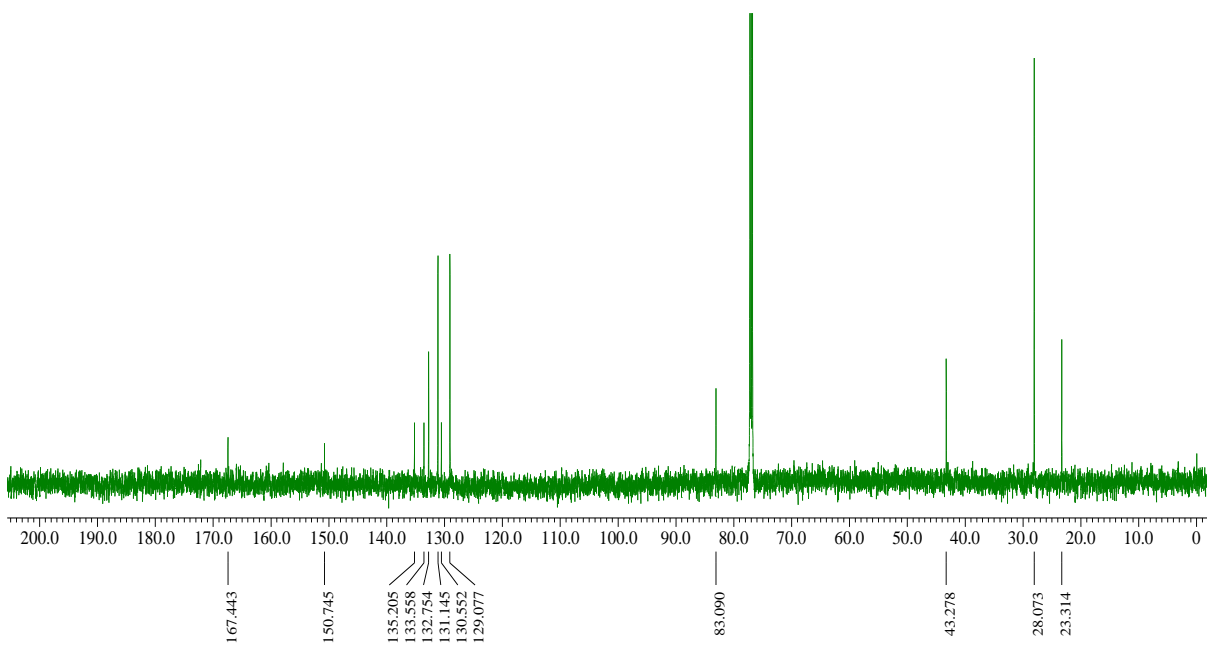

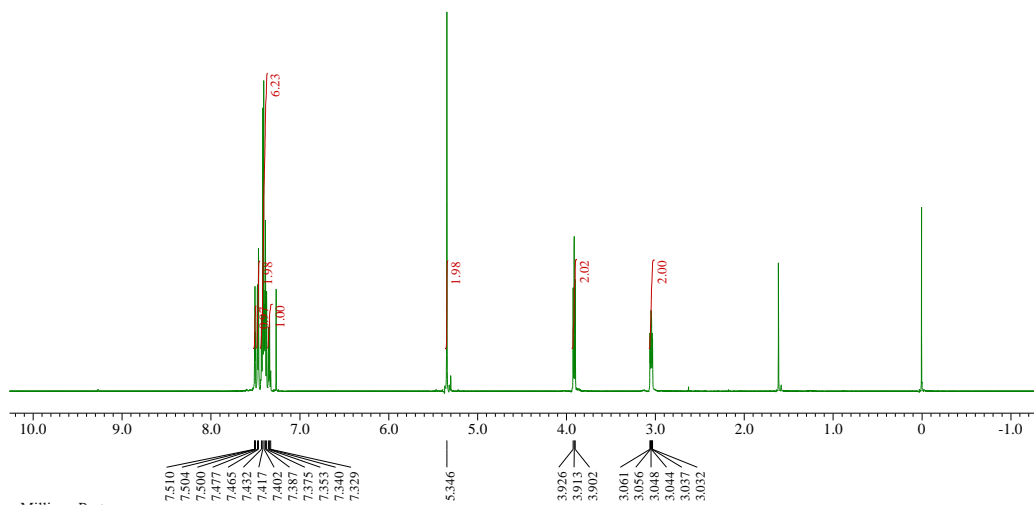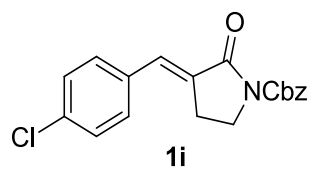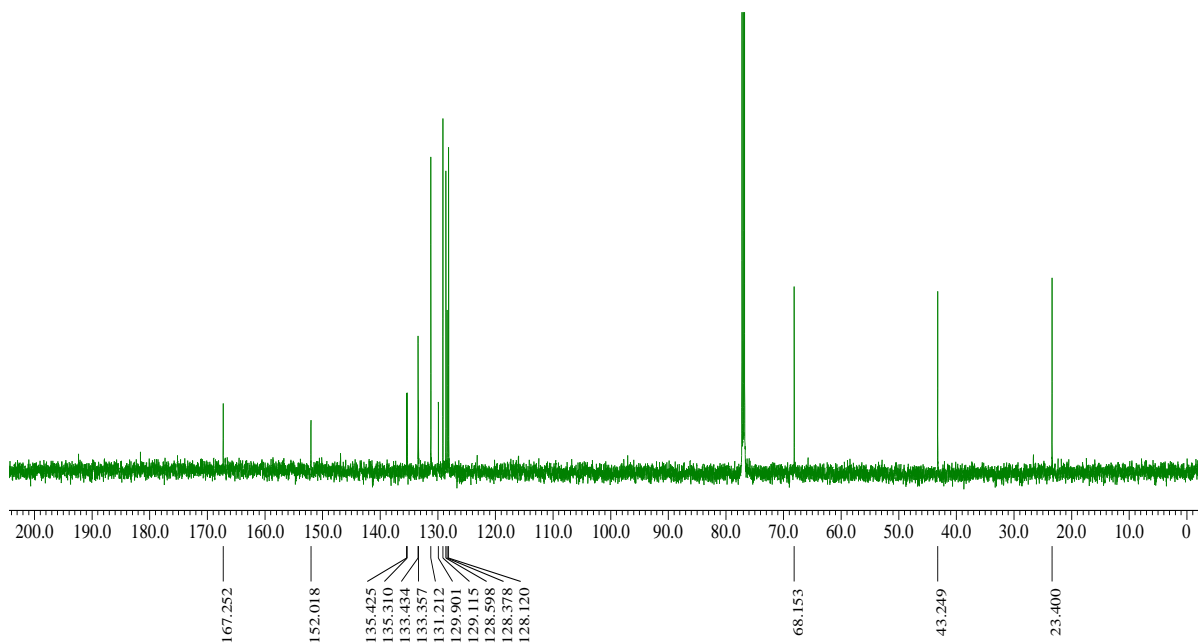

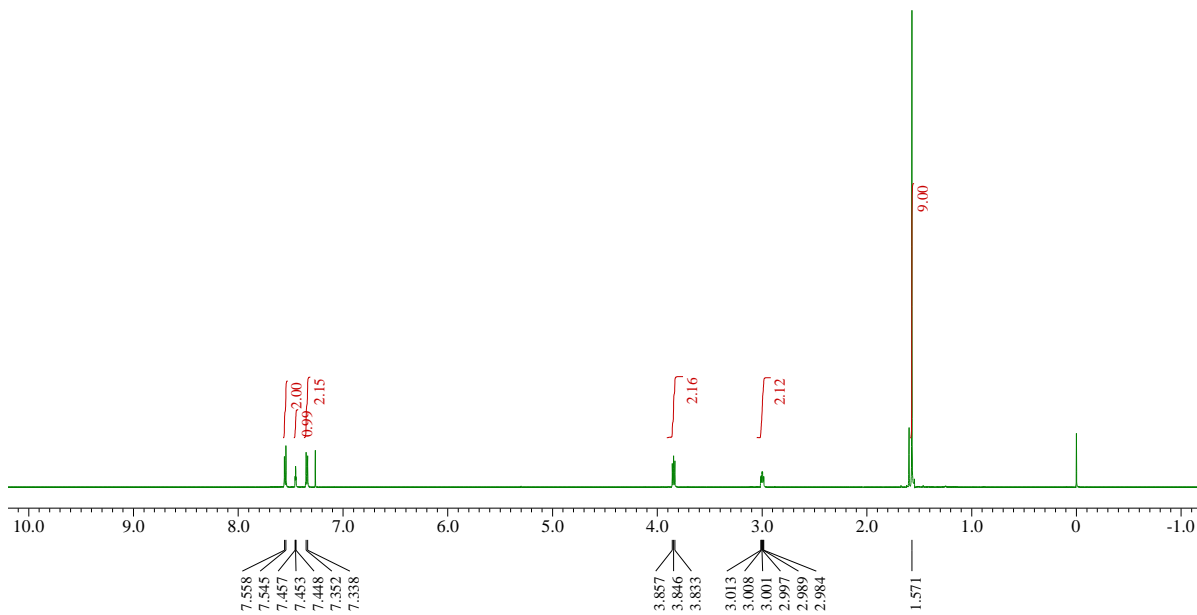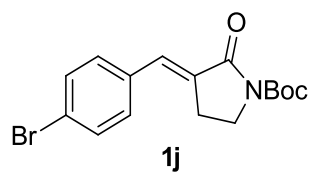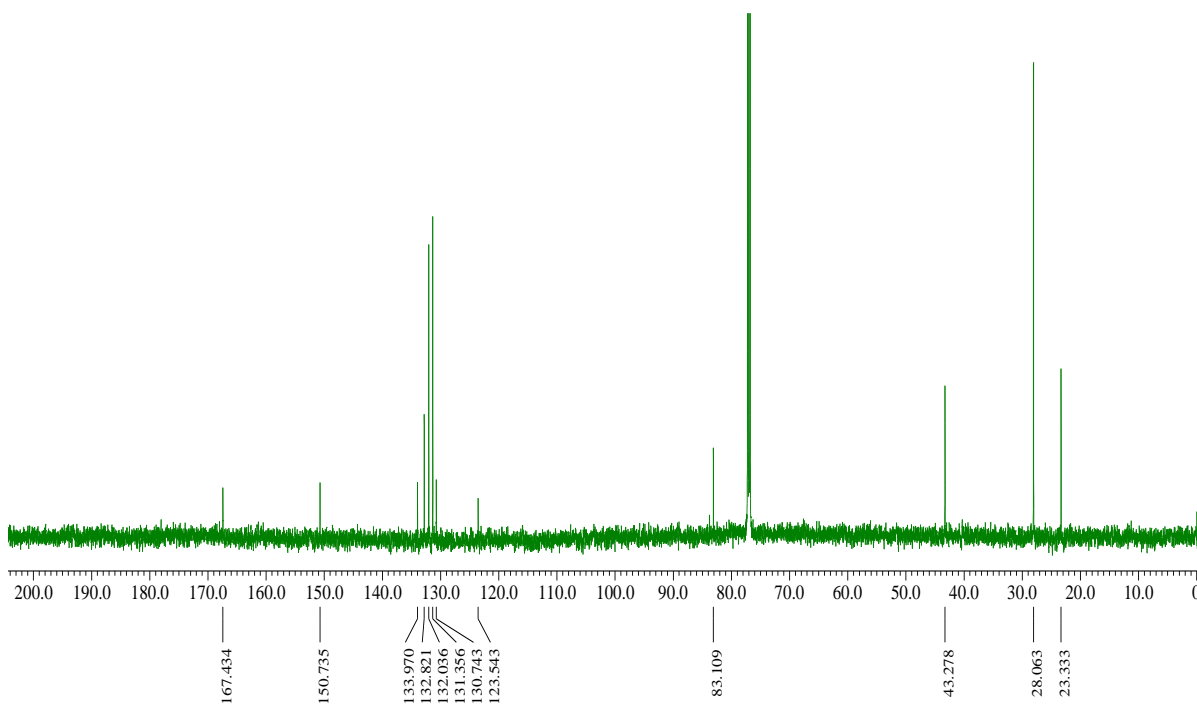

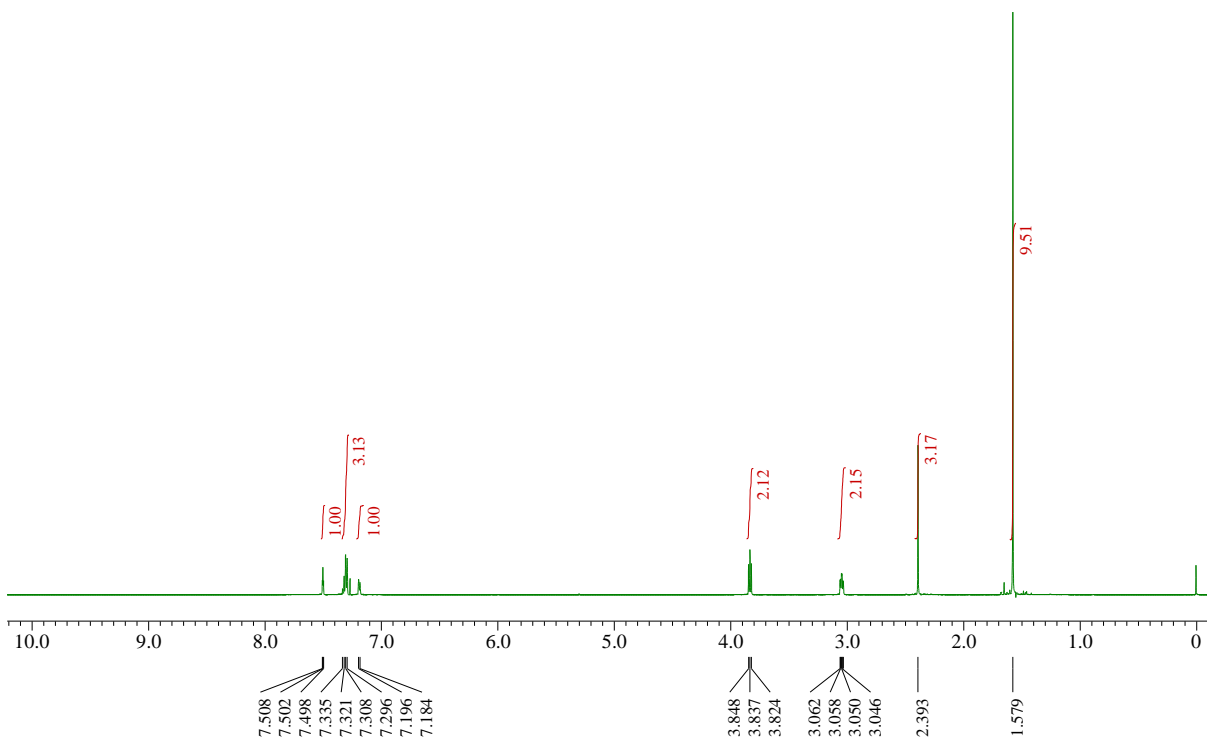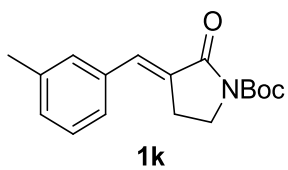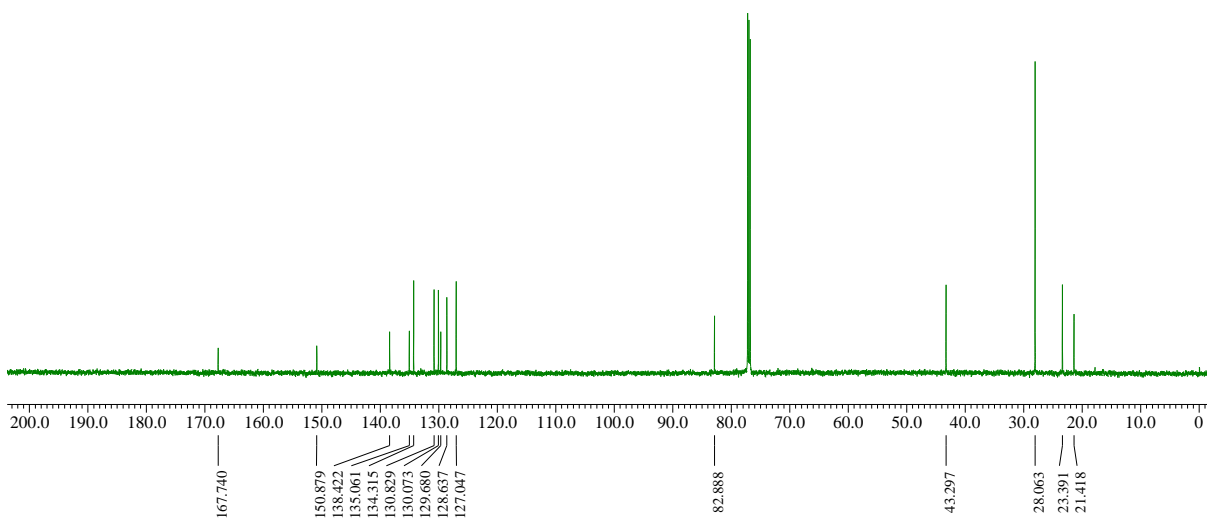

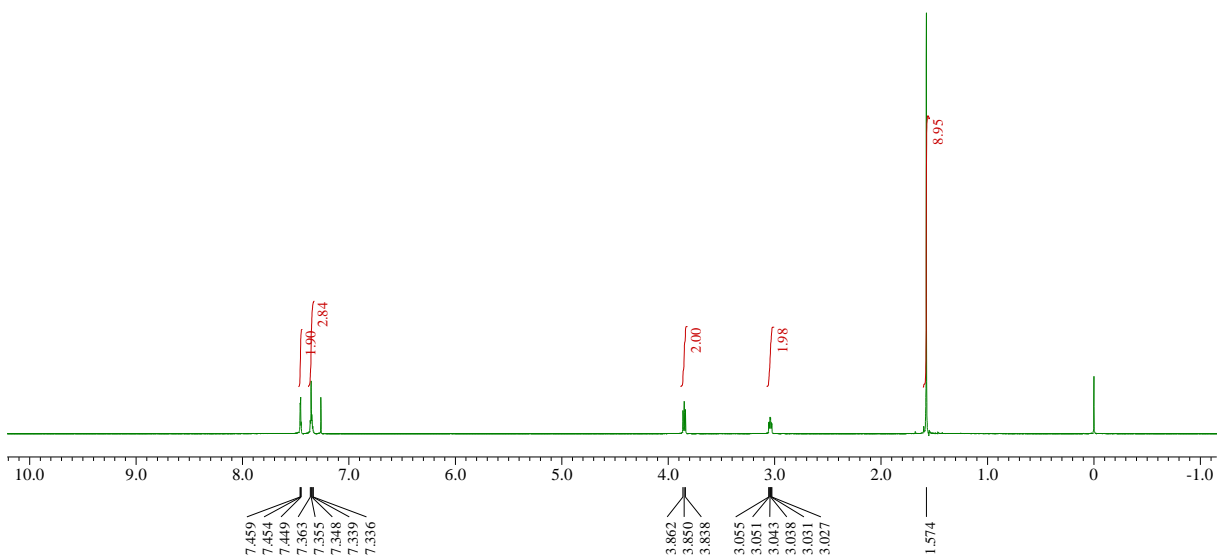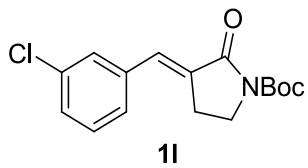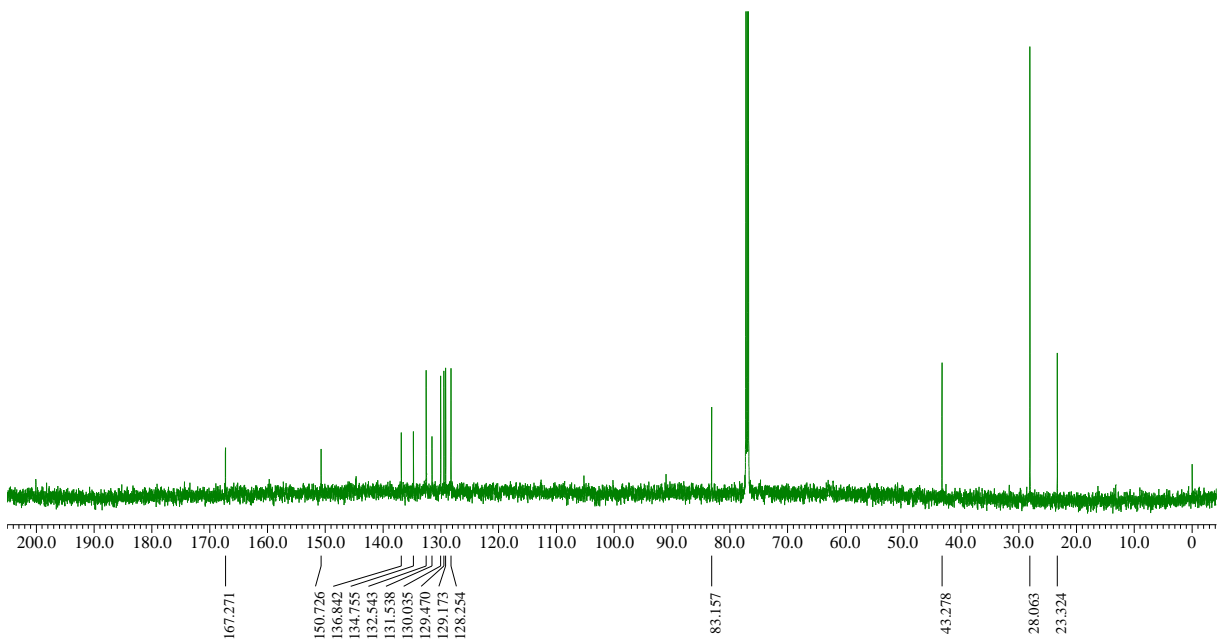

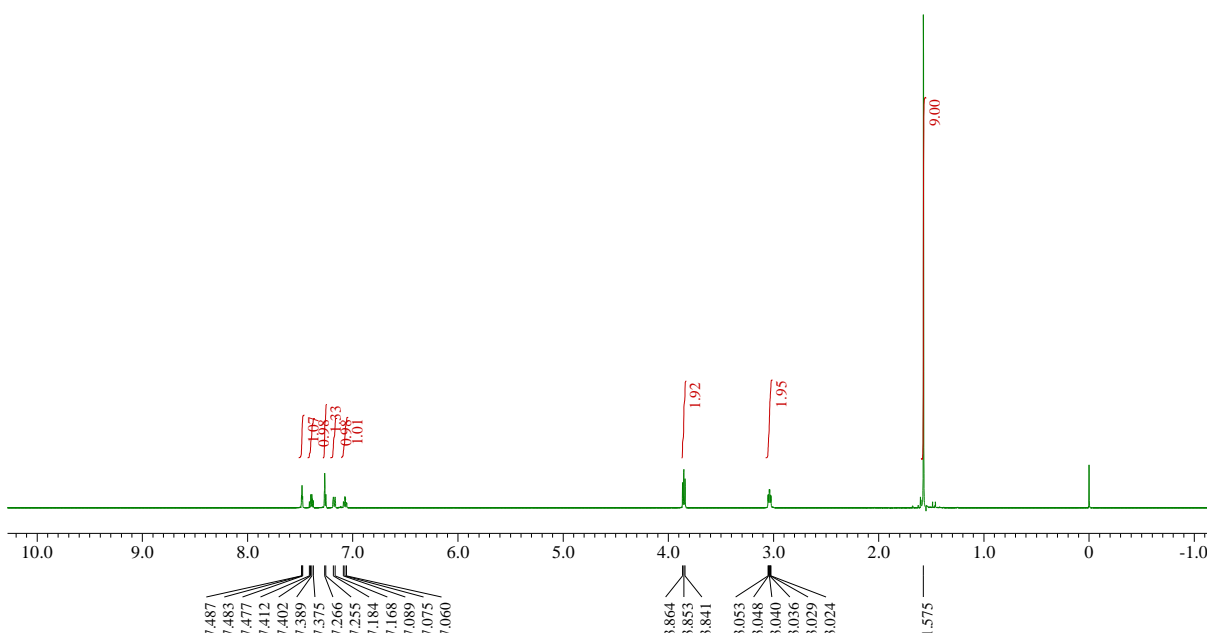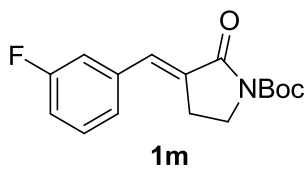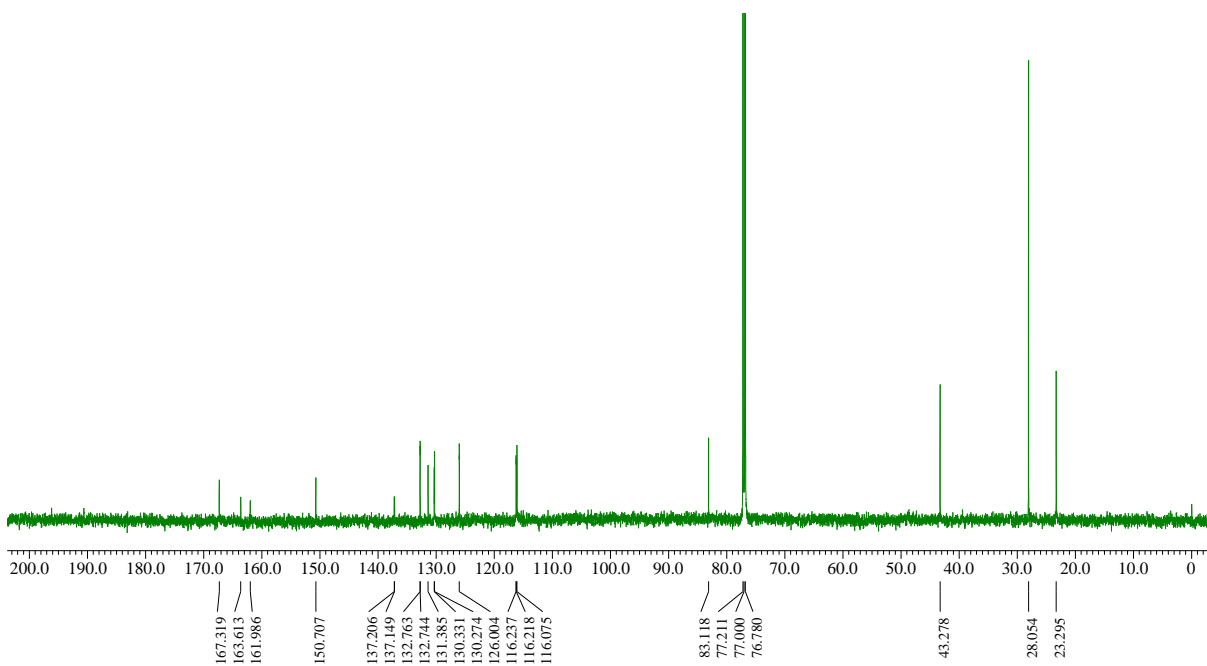

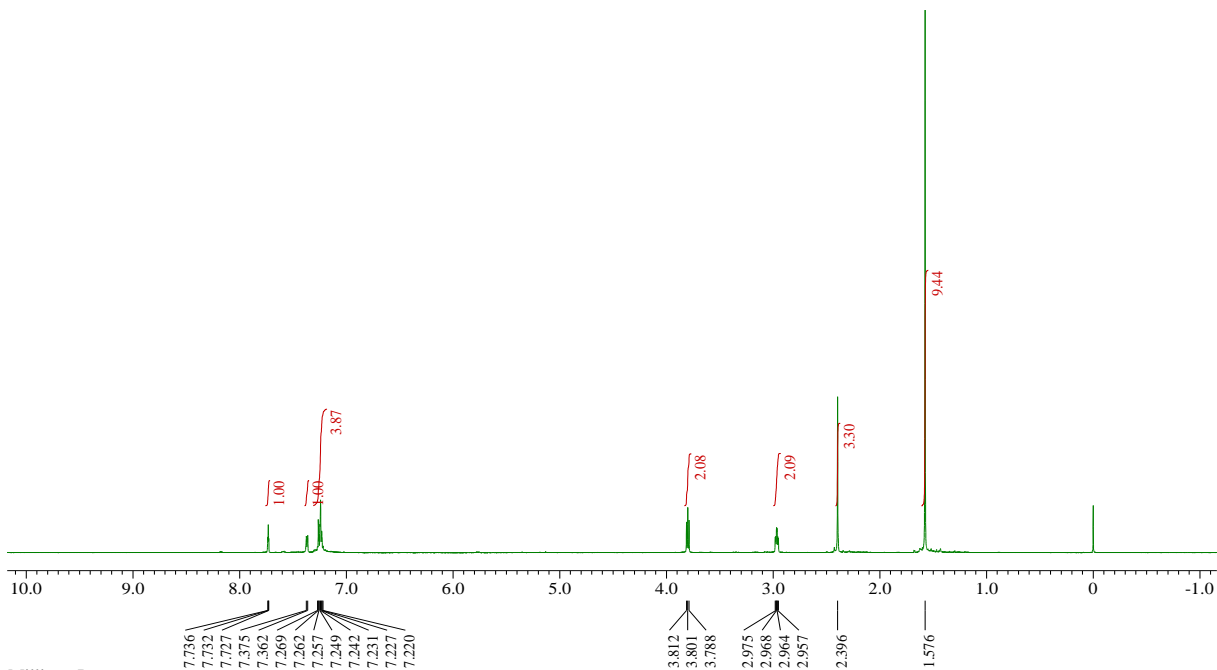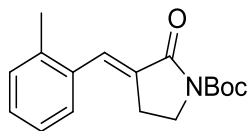

1n

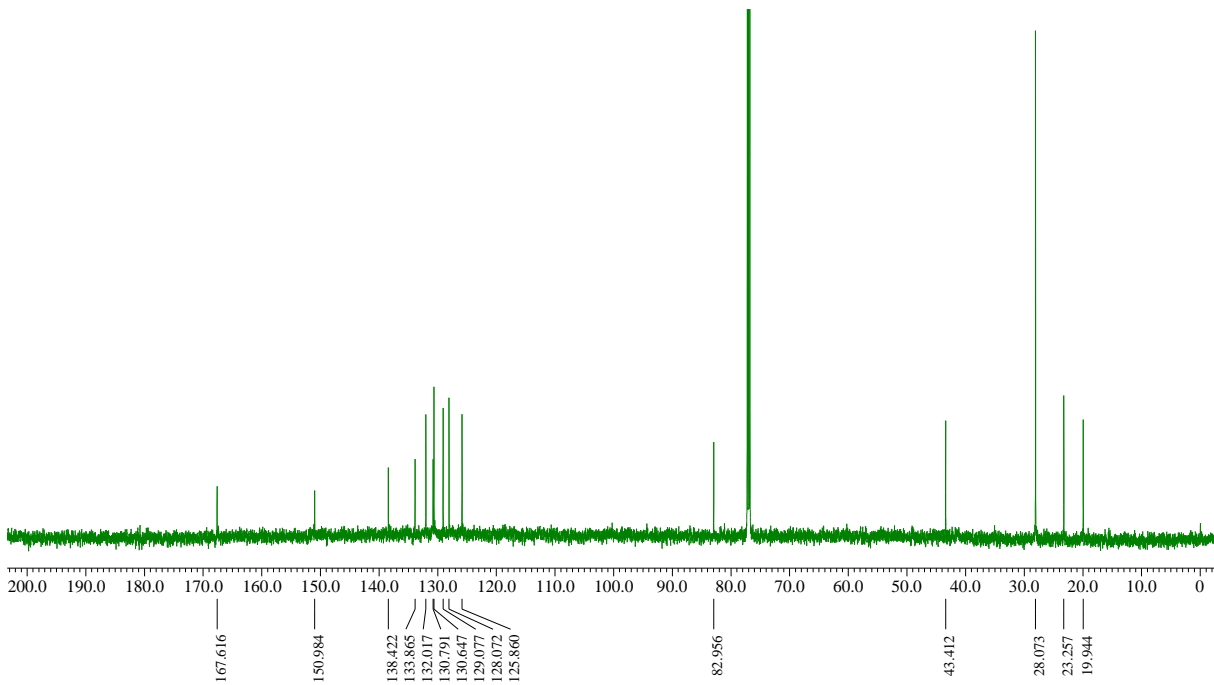



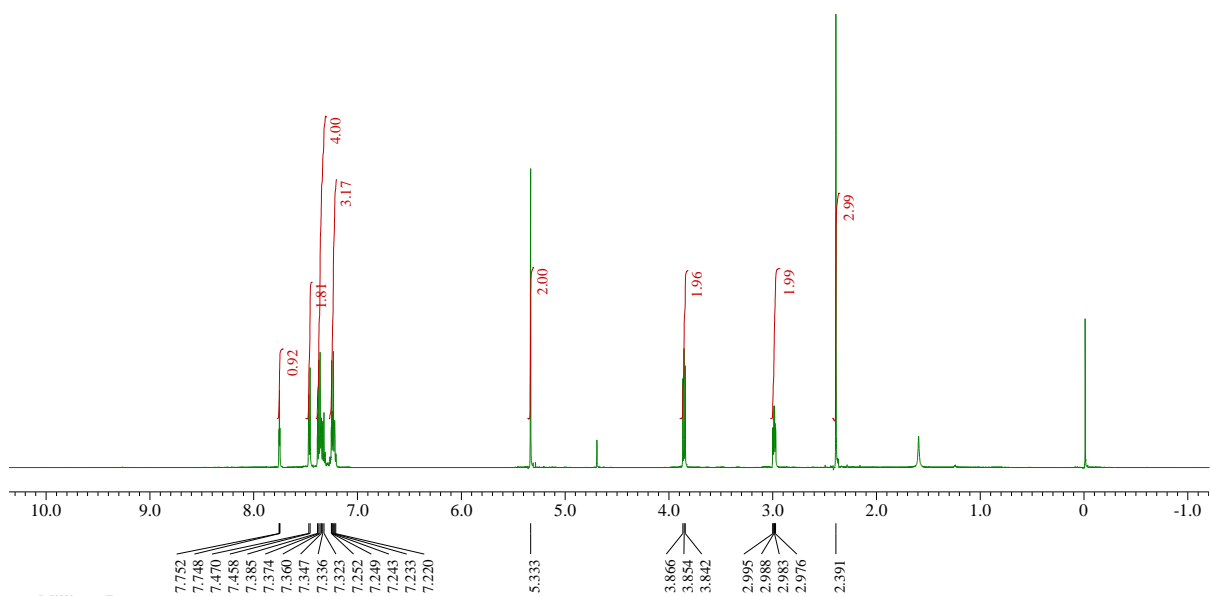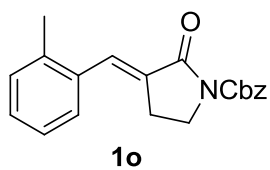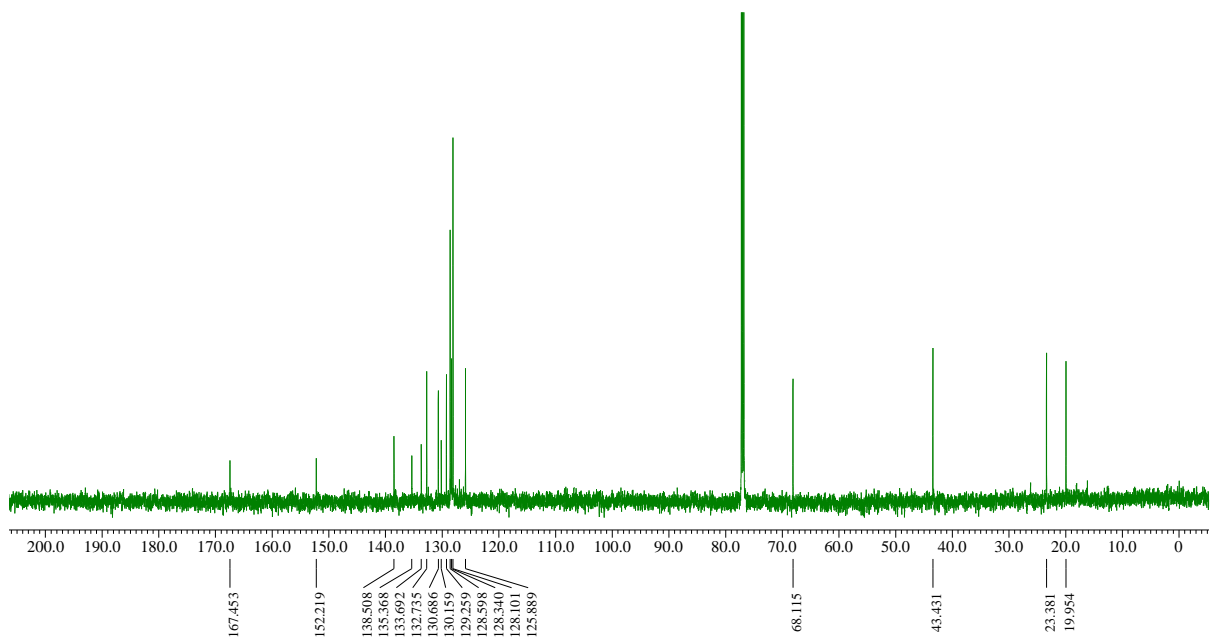

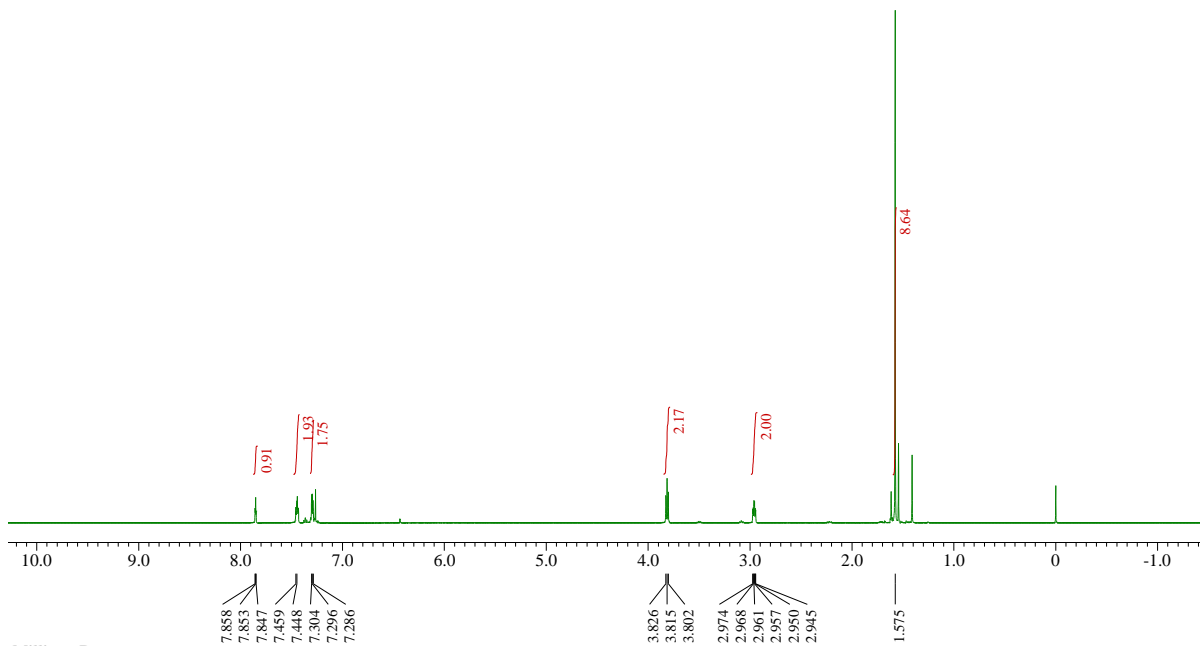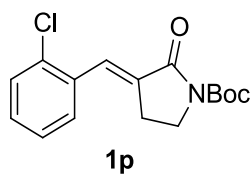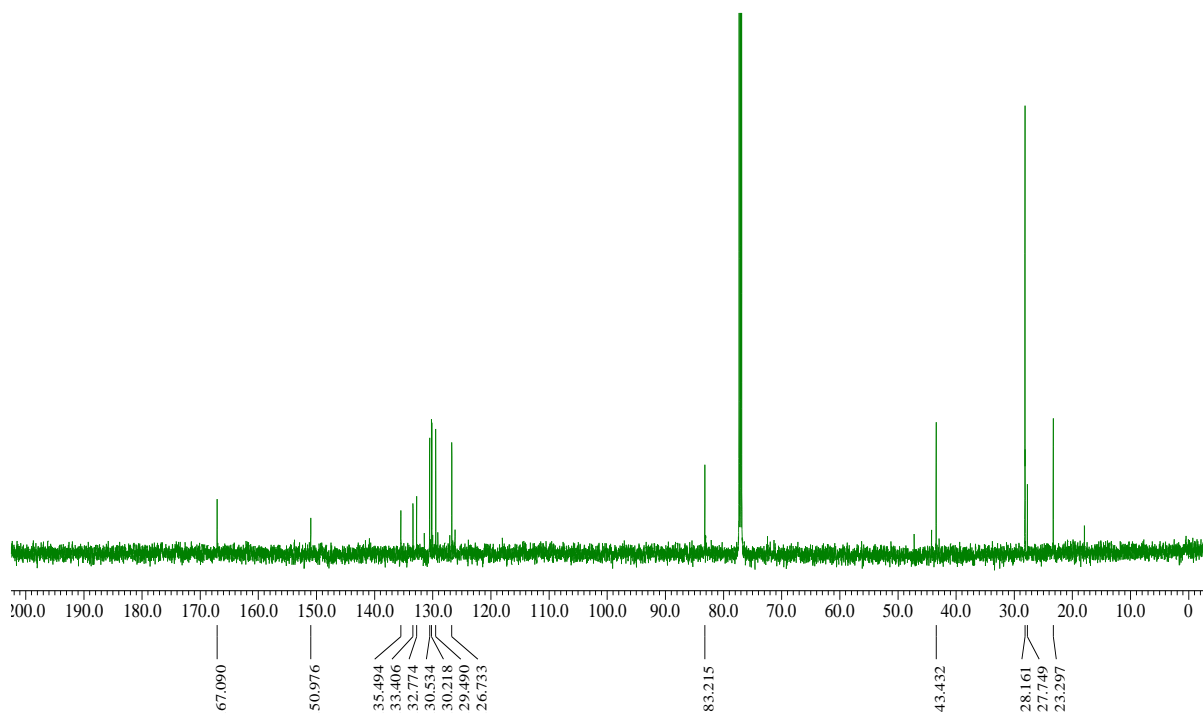

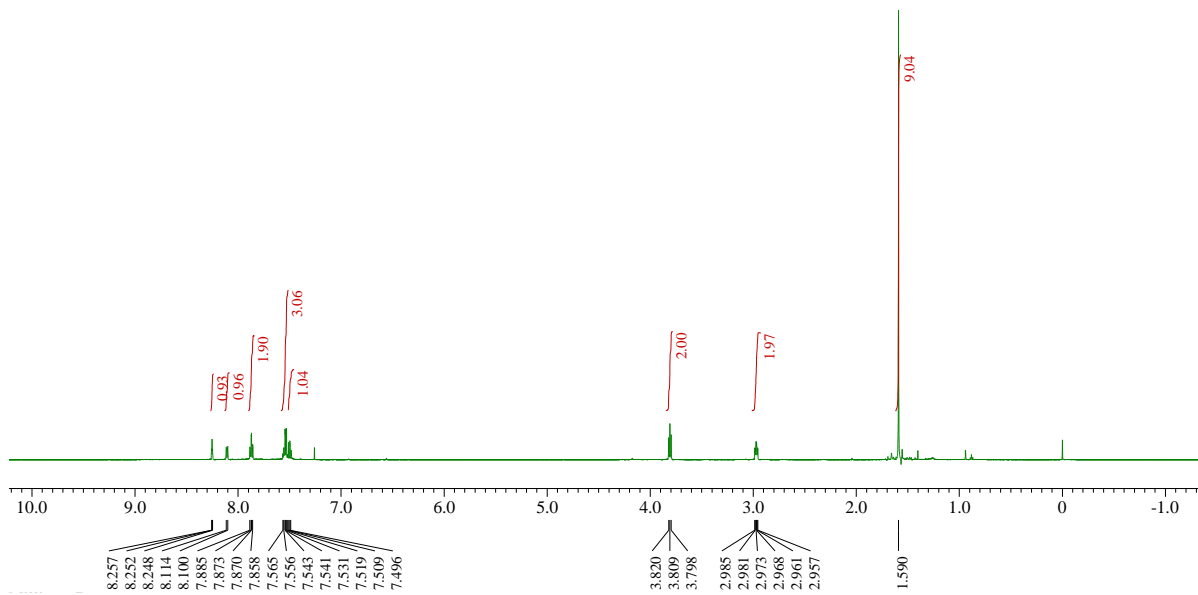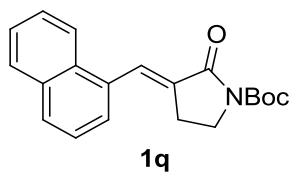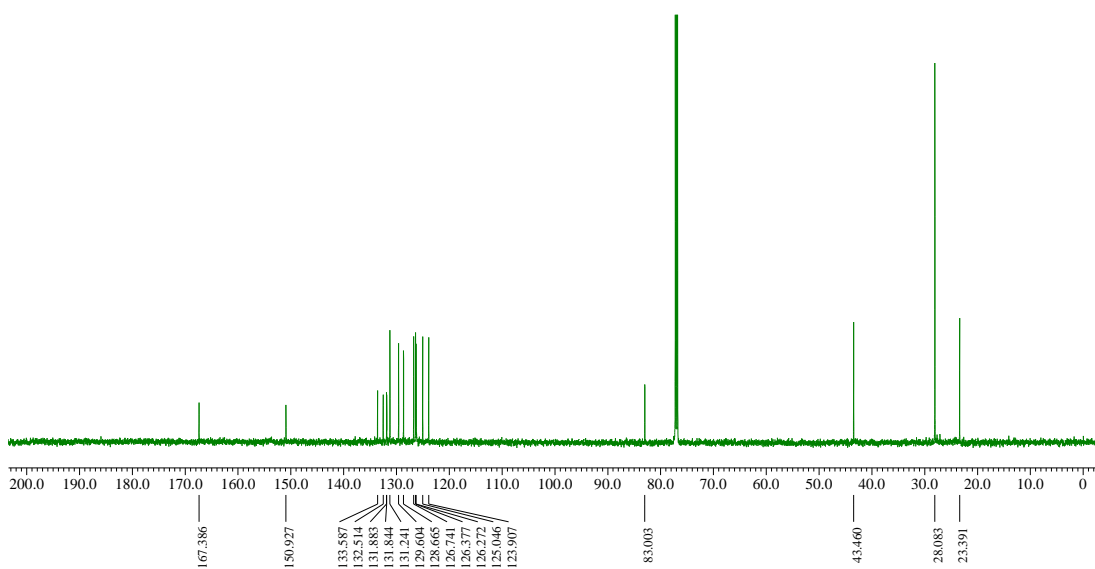

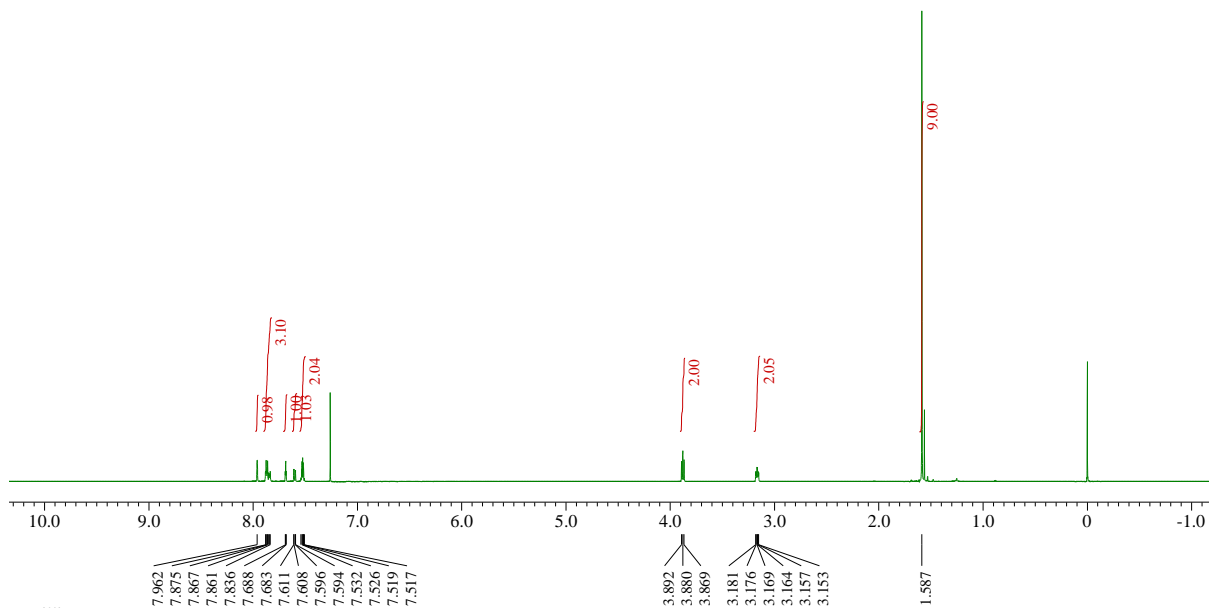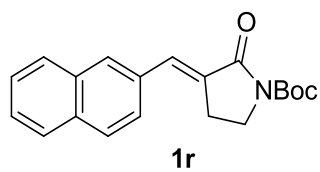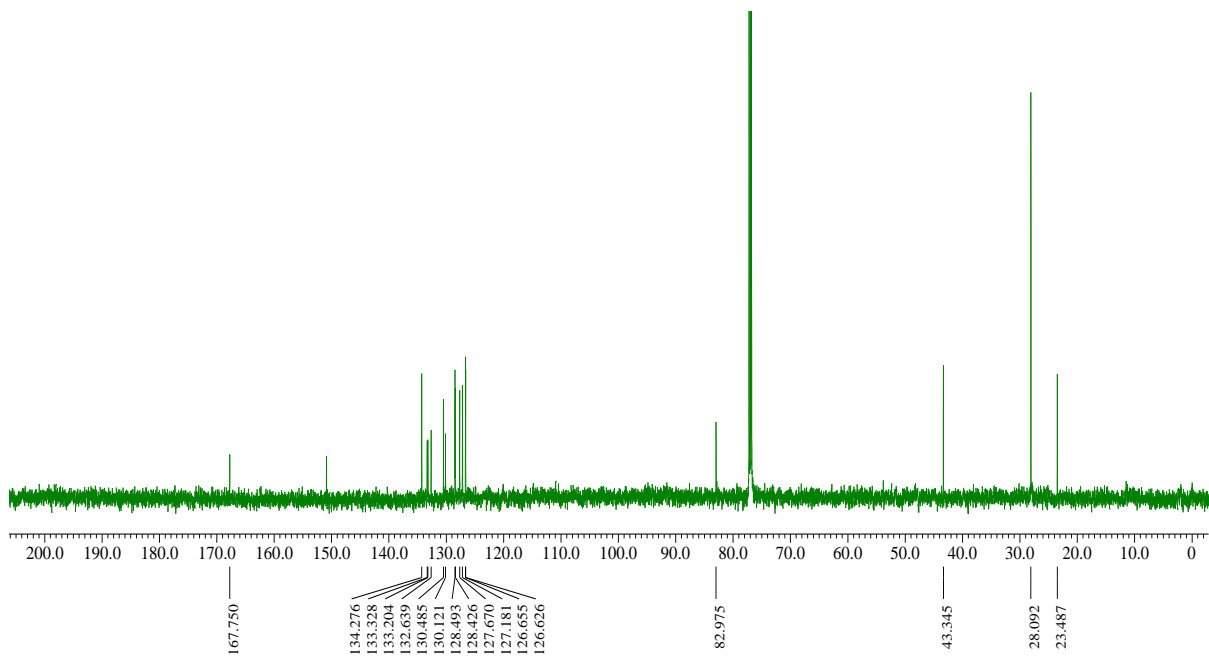

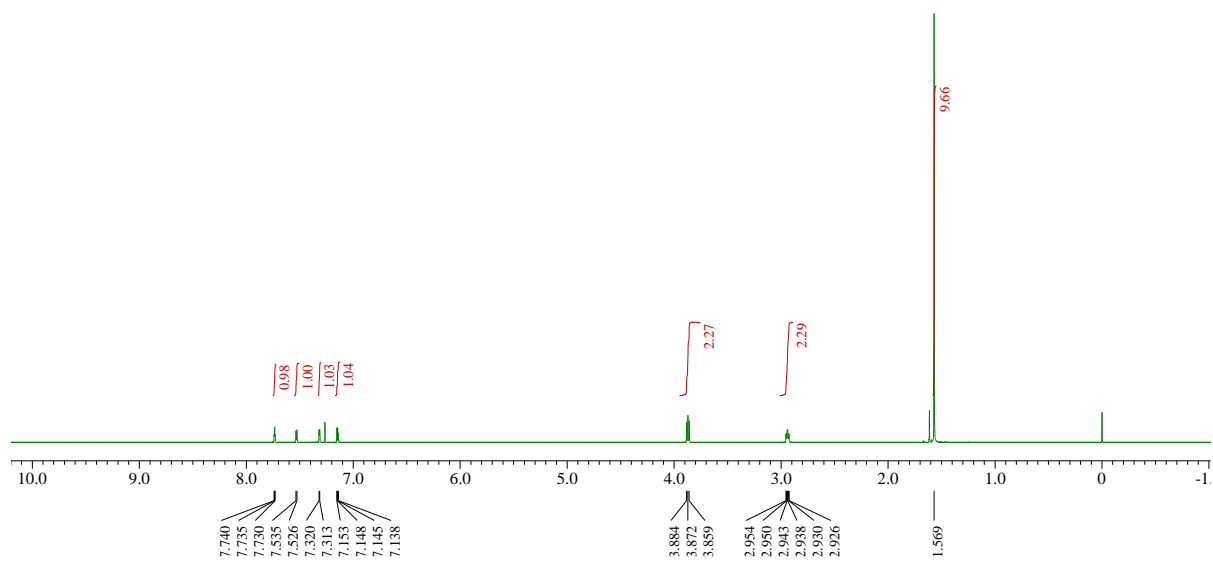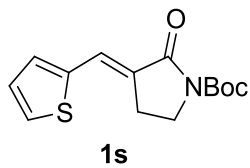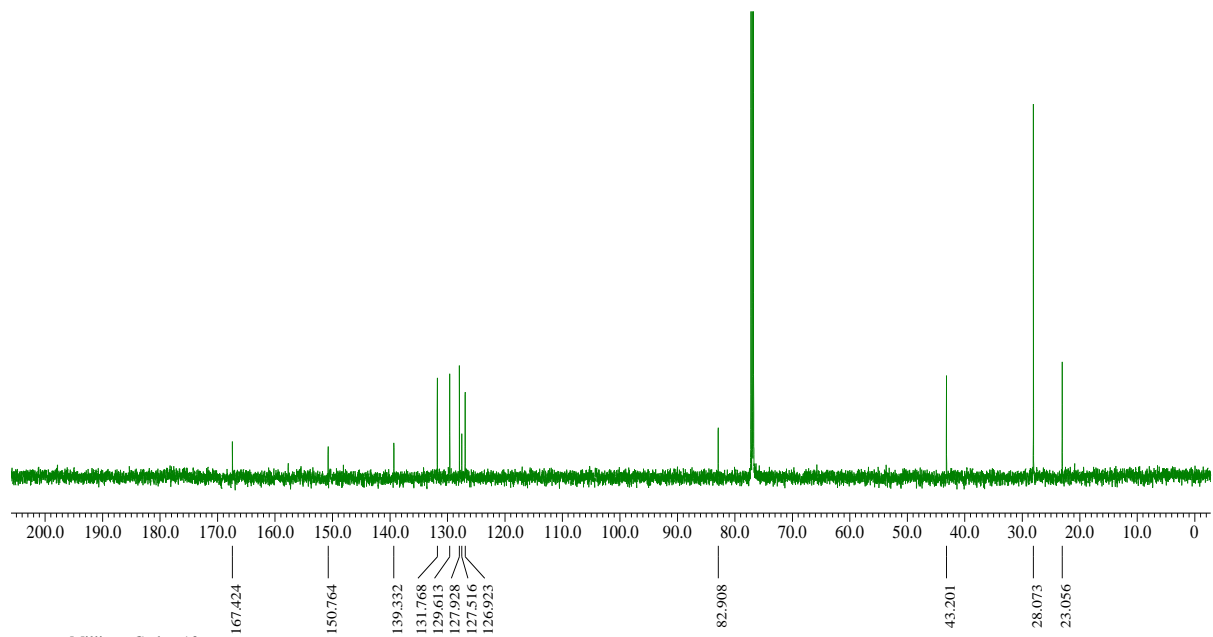

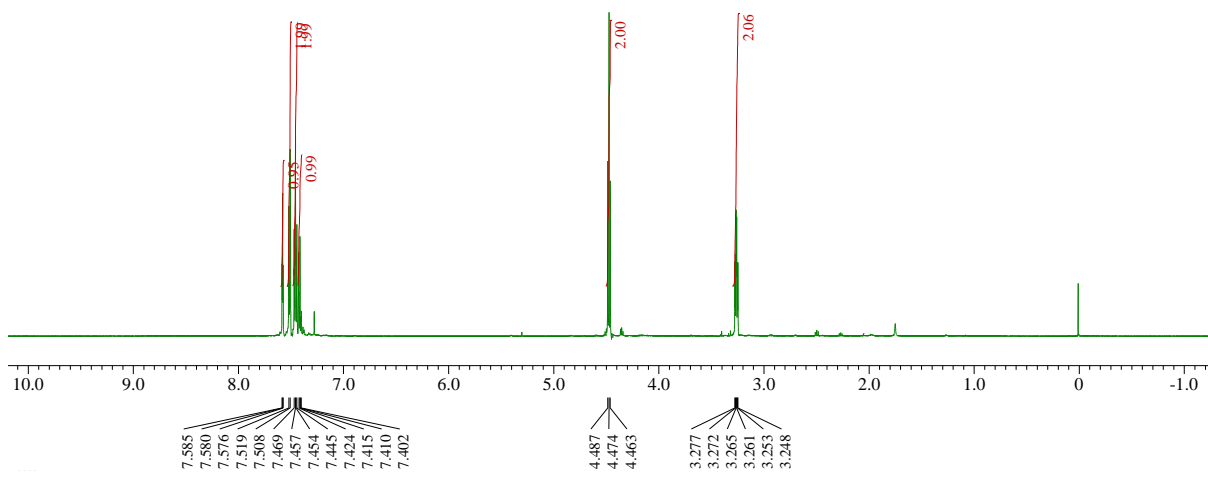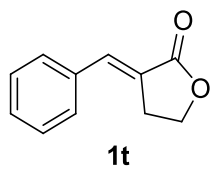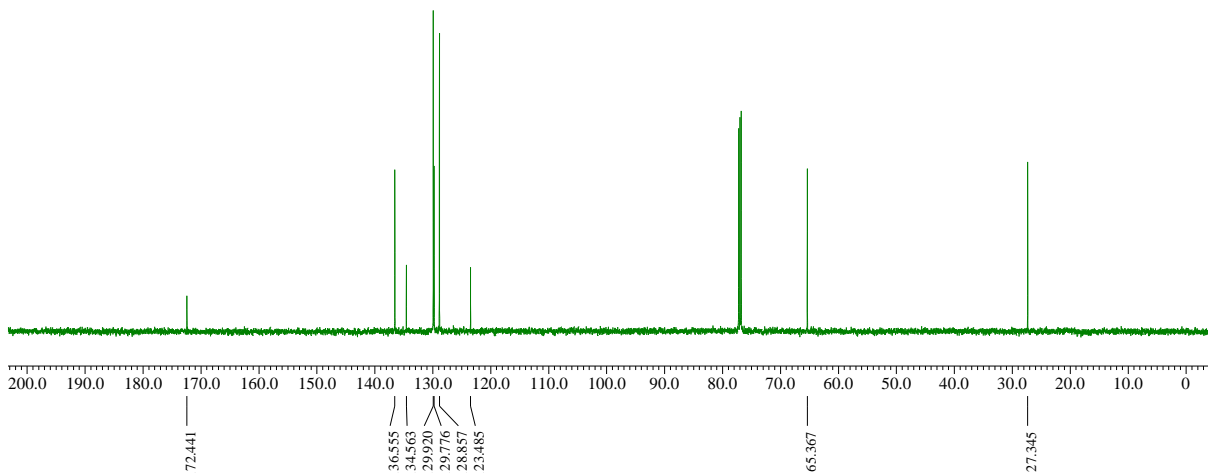

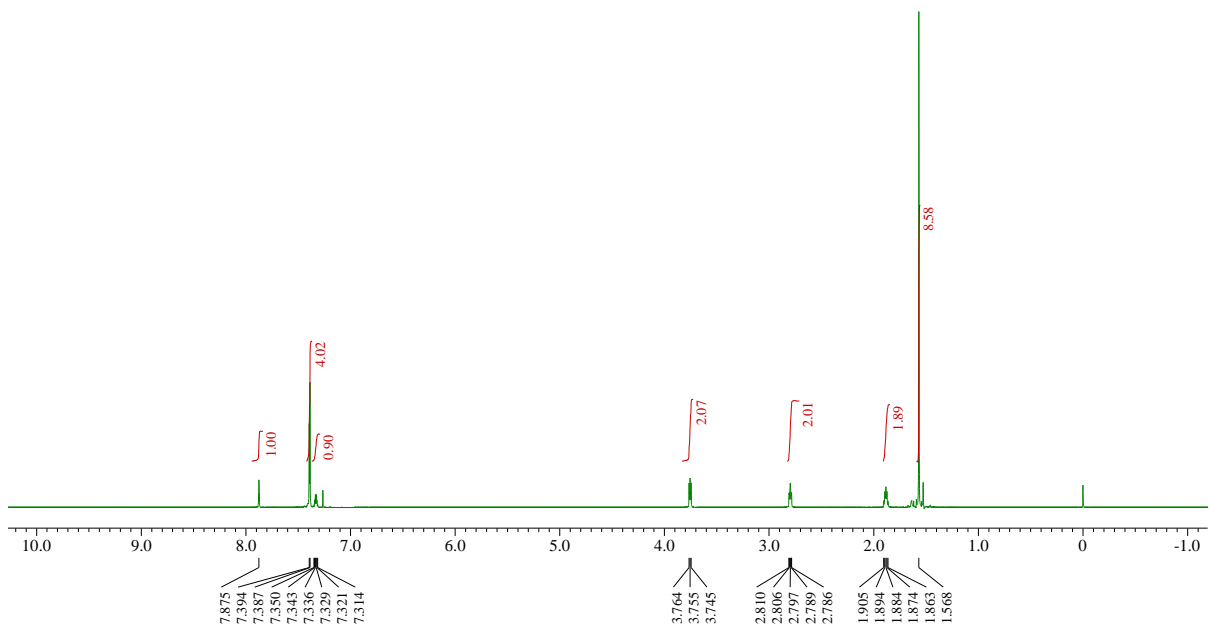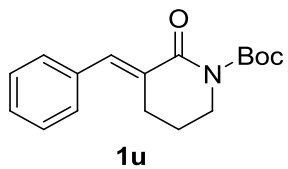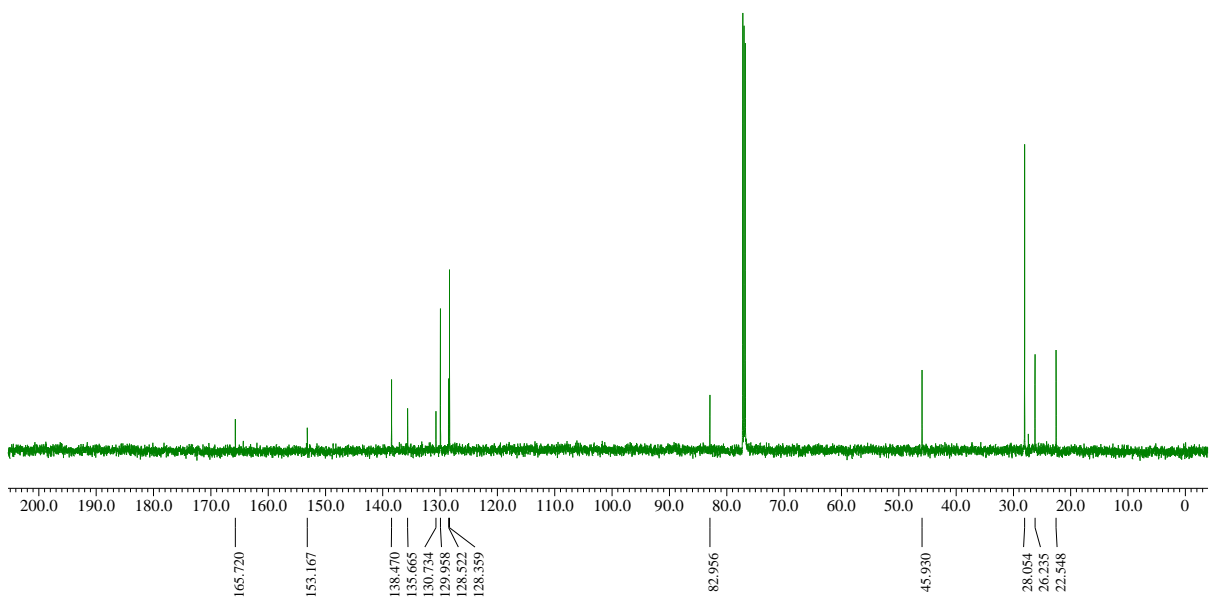

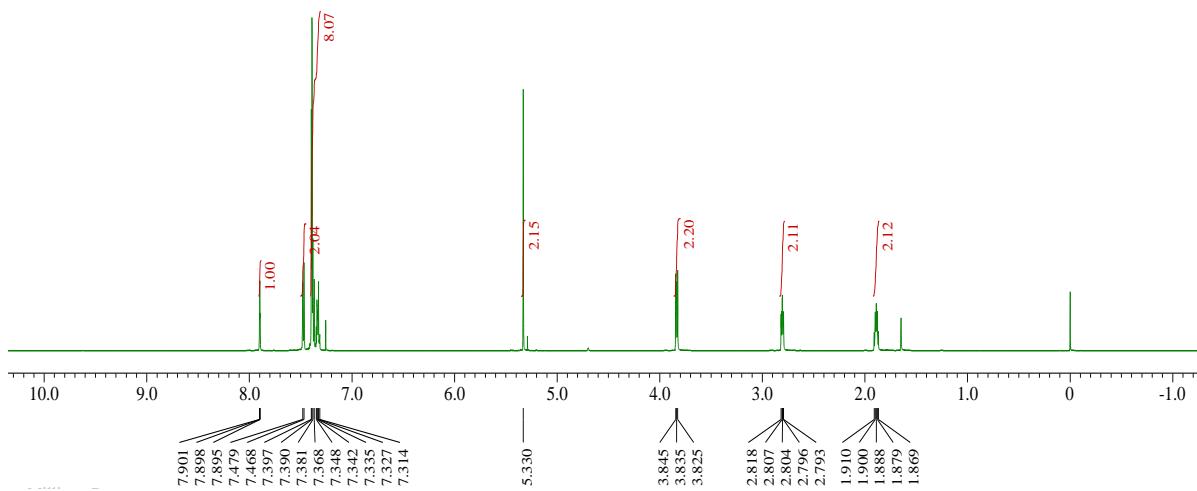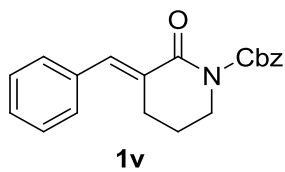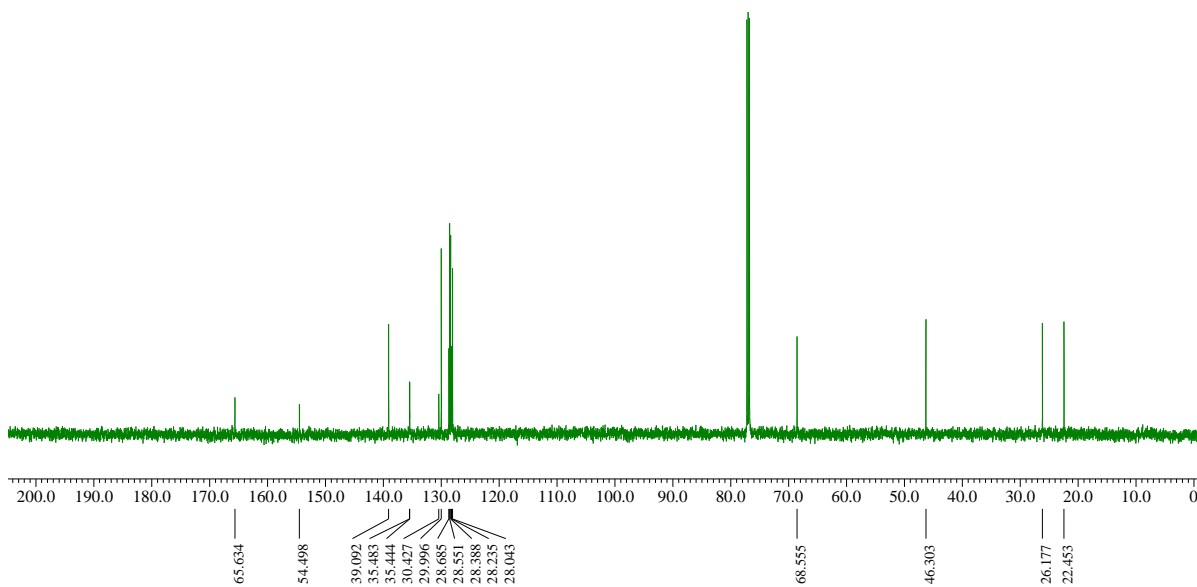



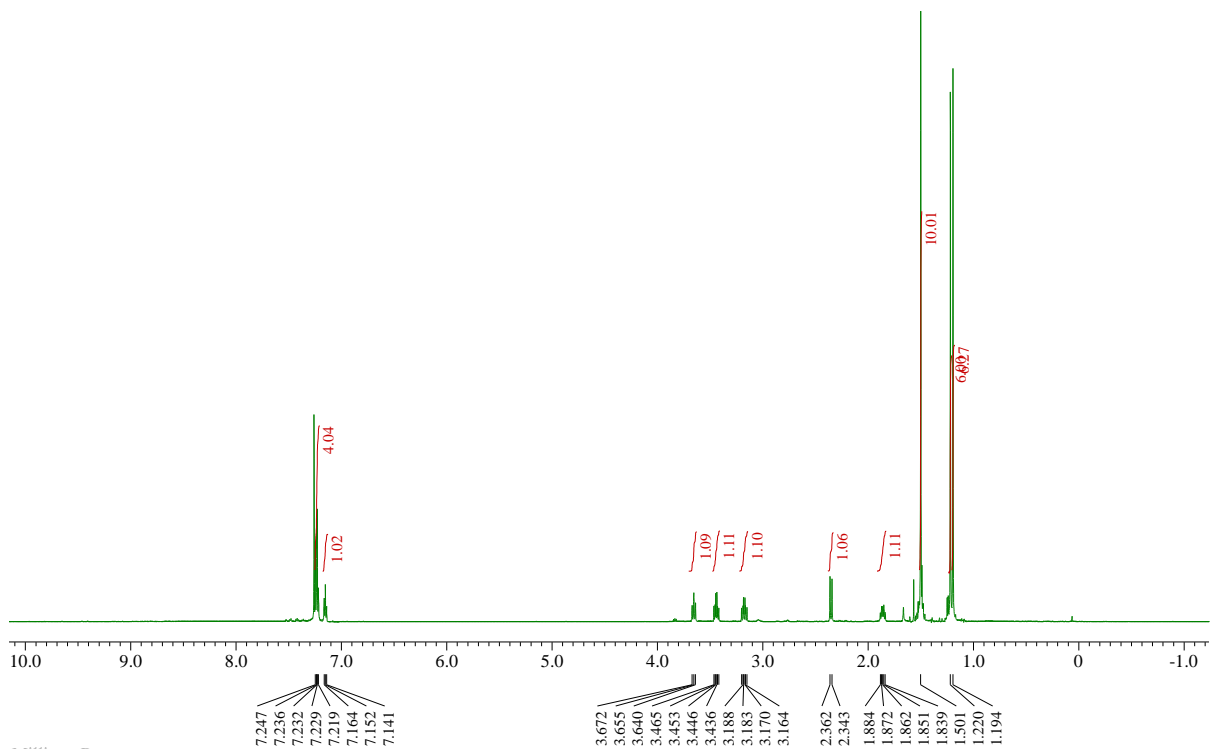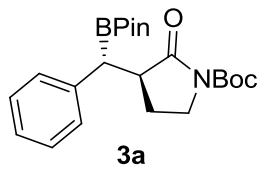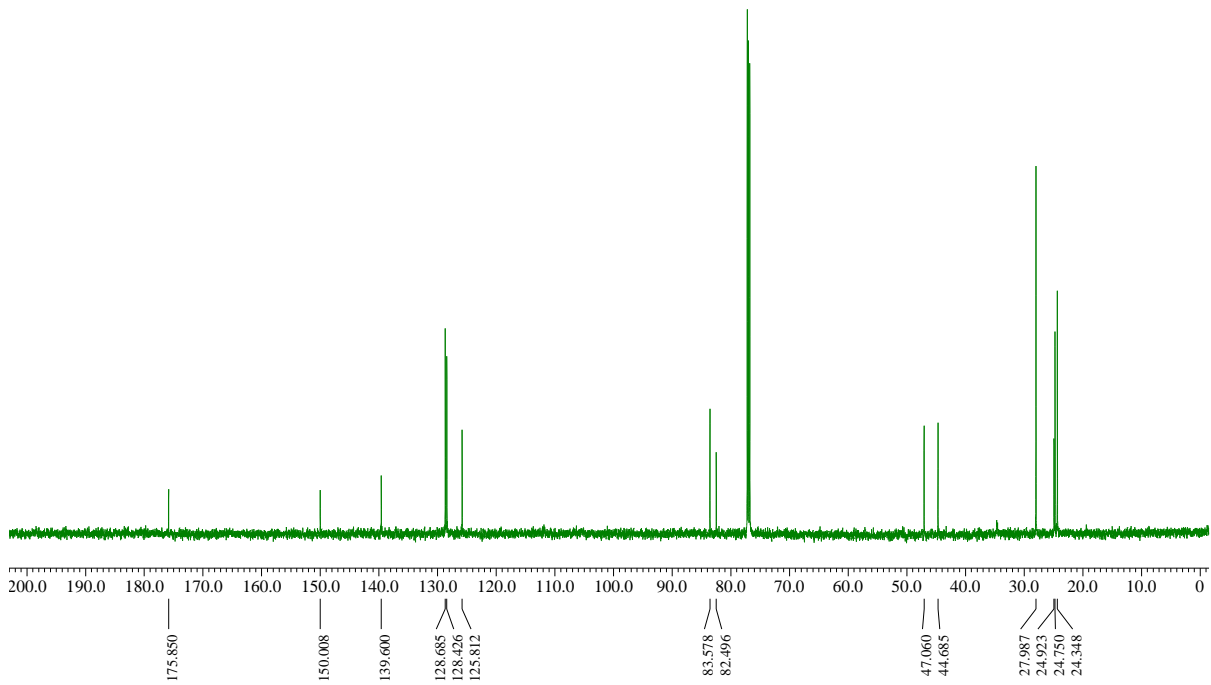

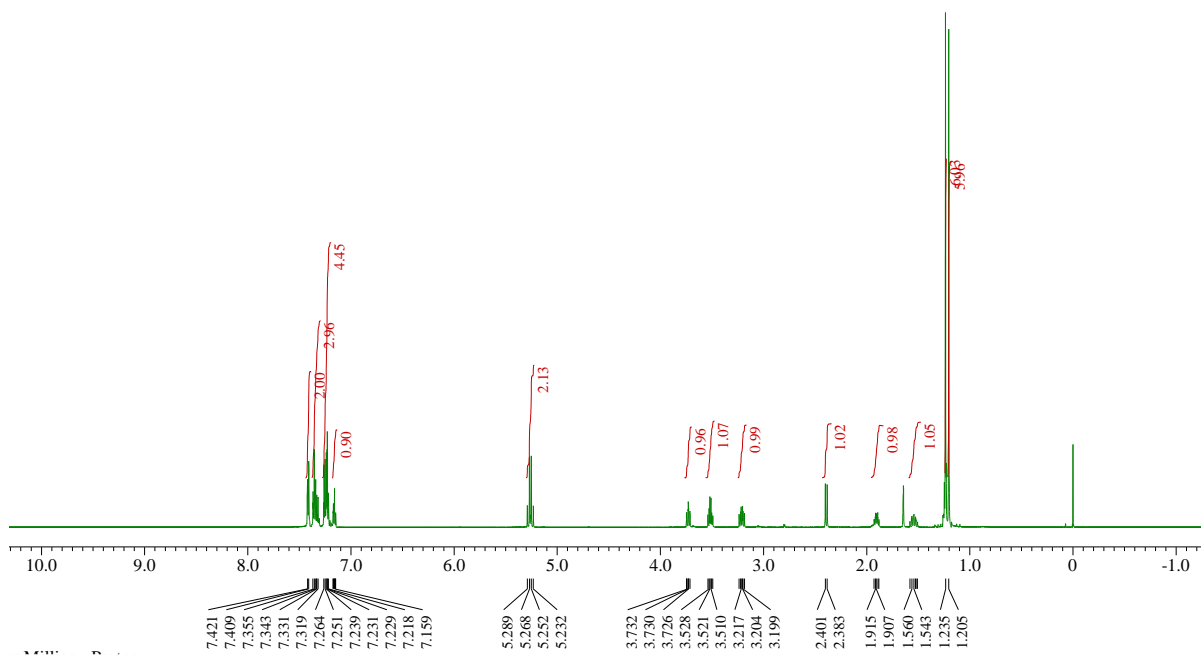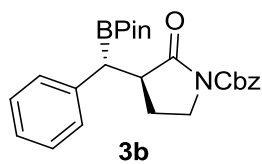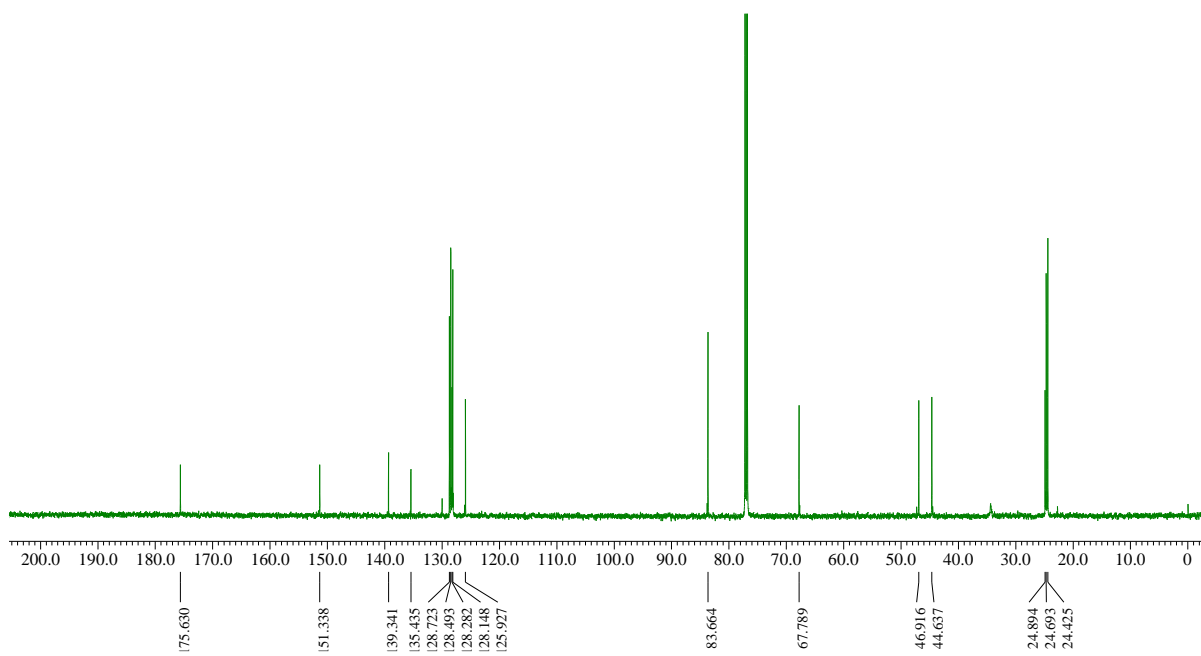

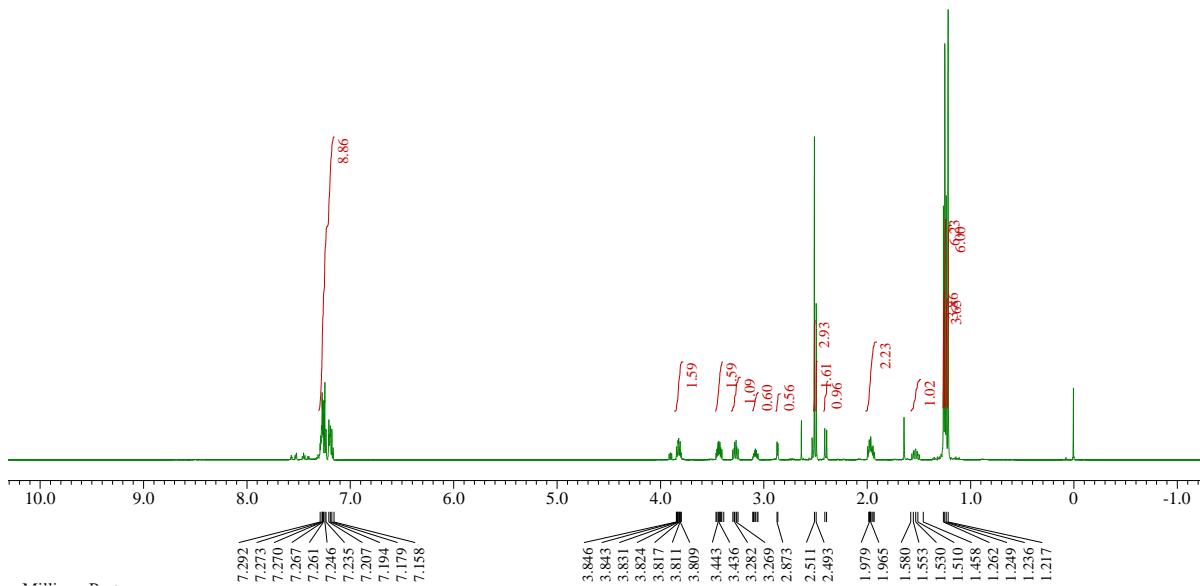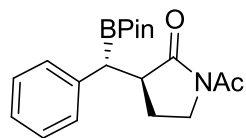

**3c**, dr 66:34

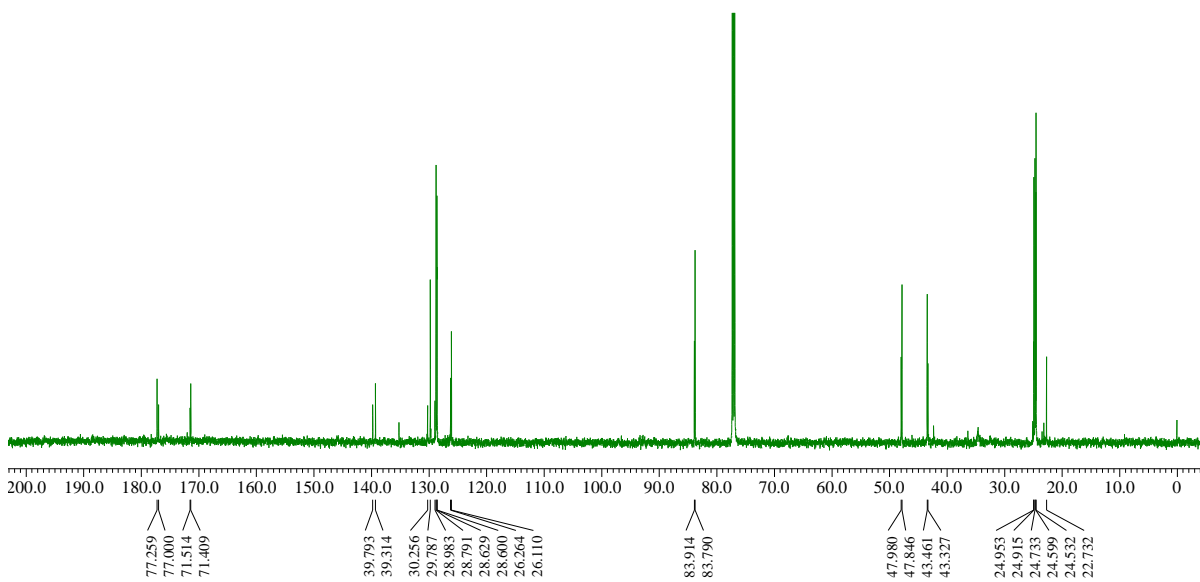

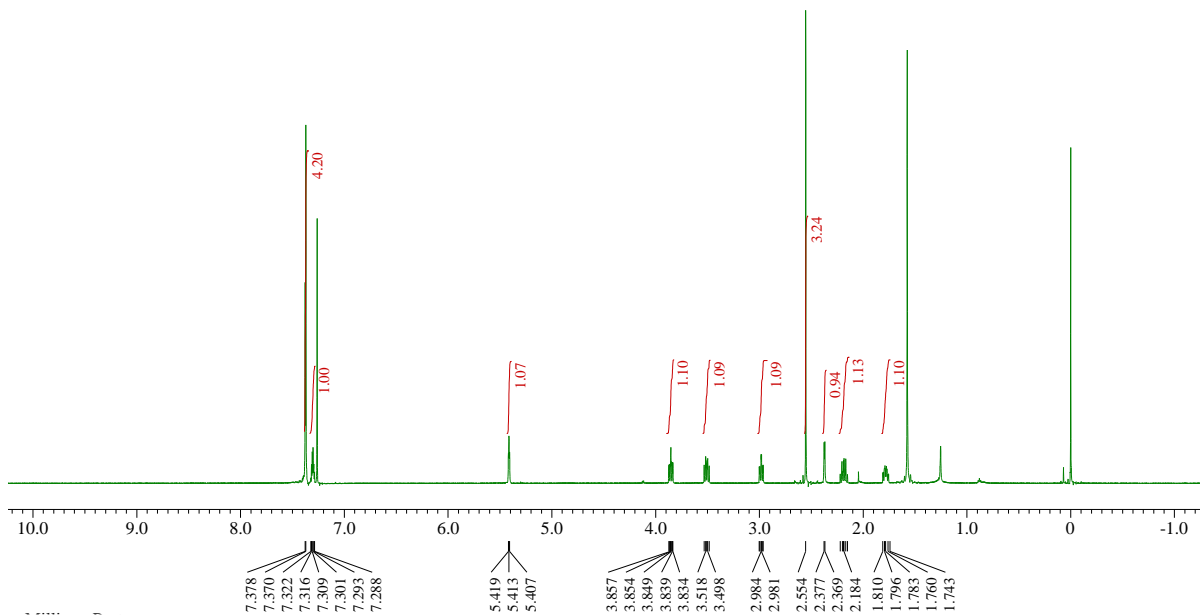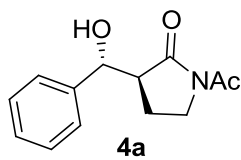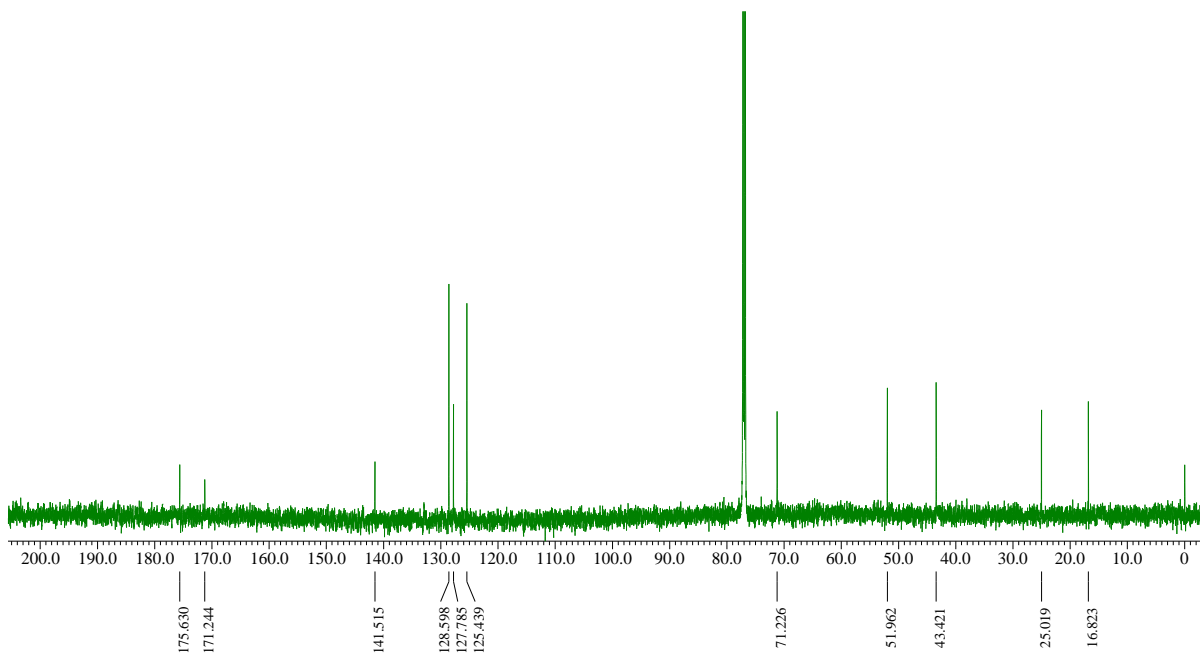

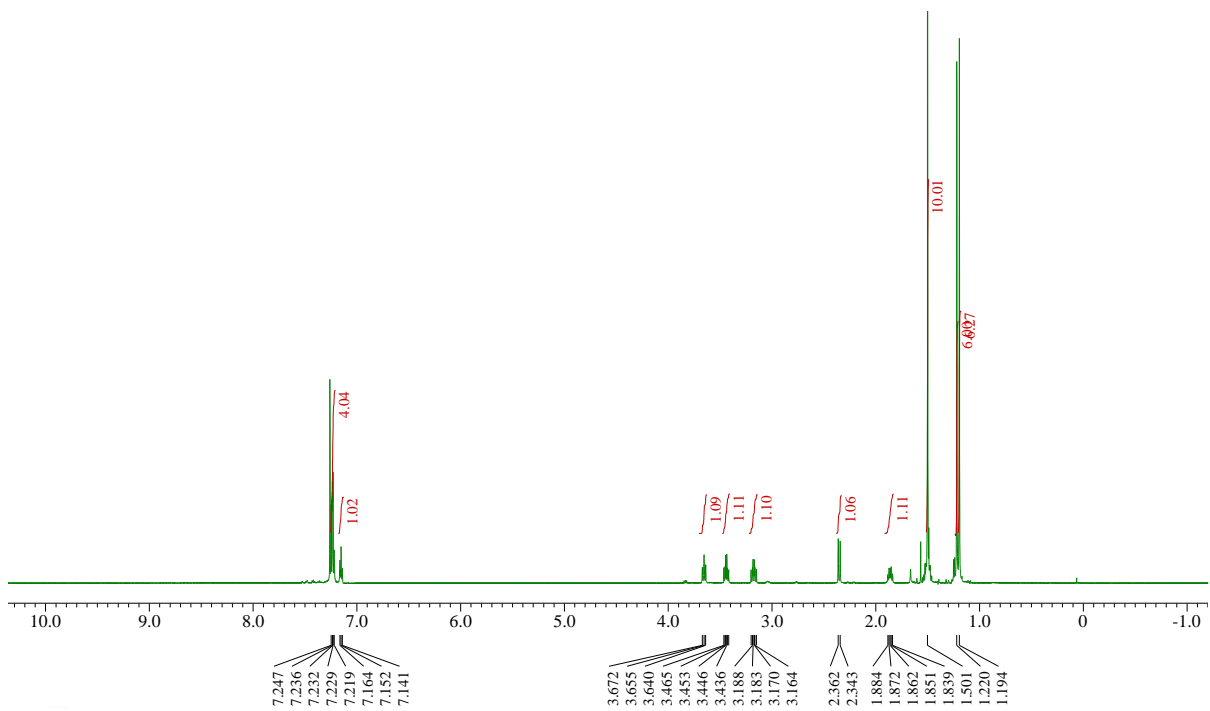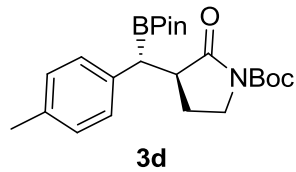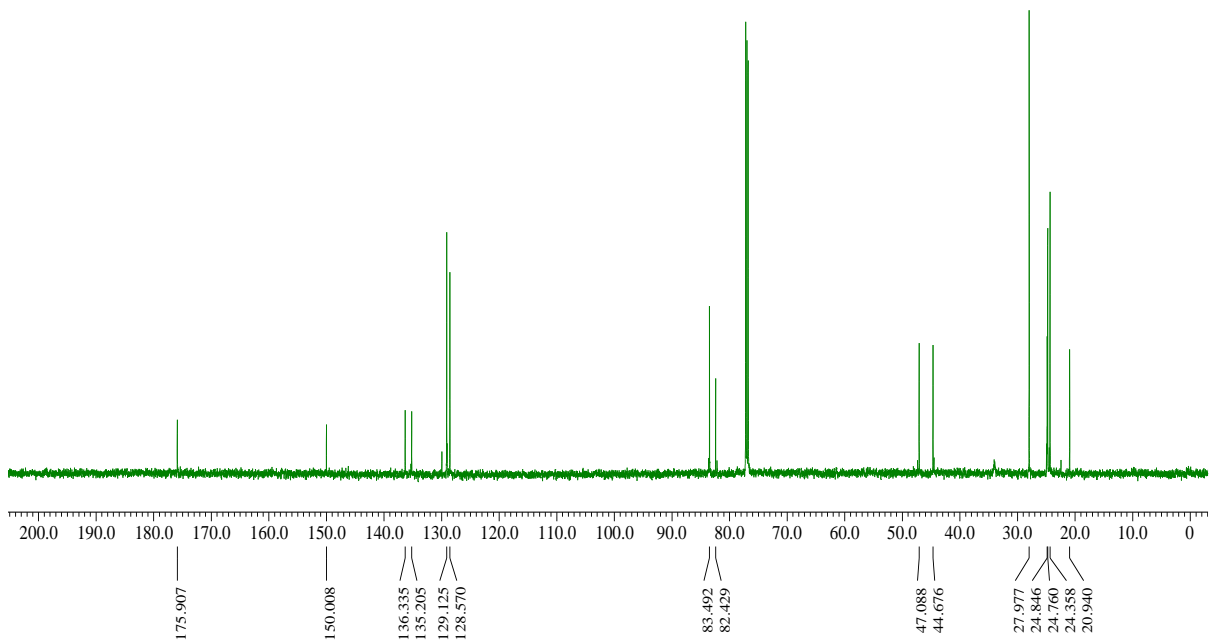

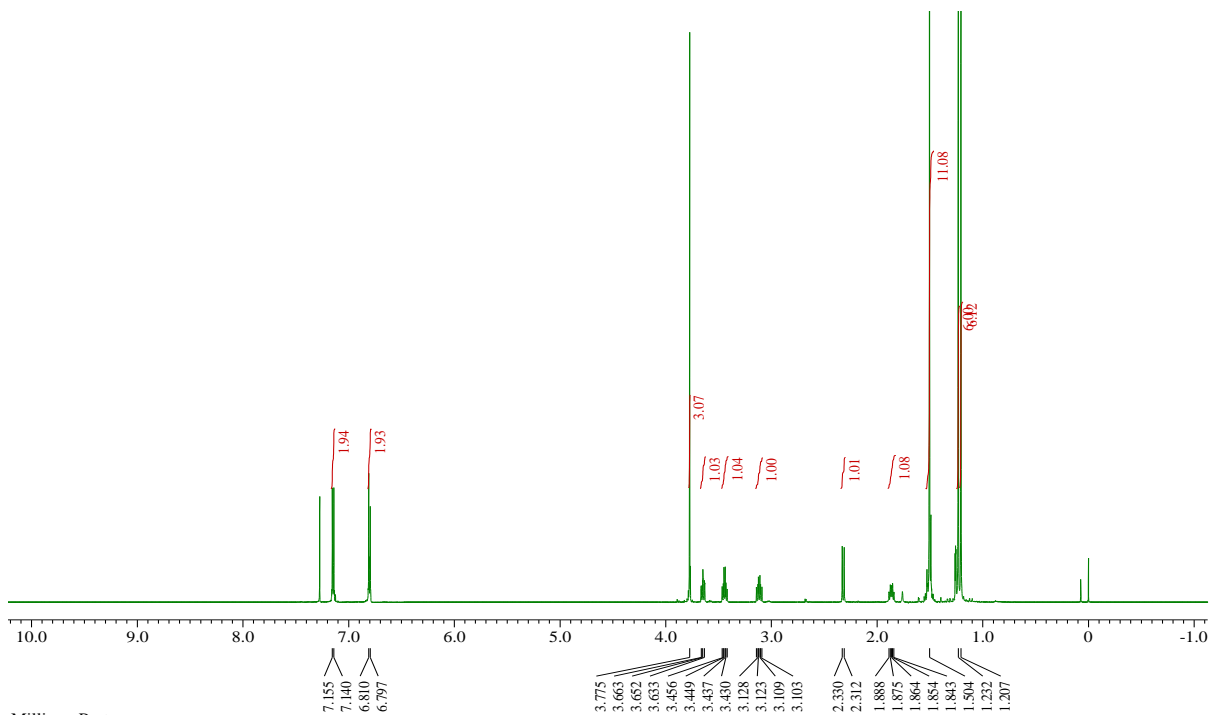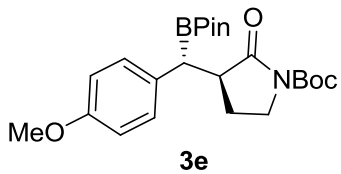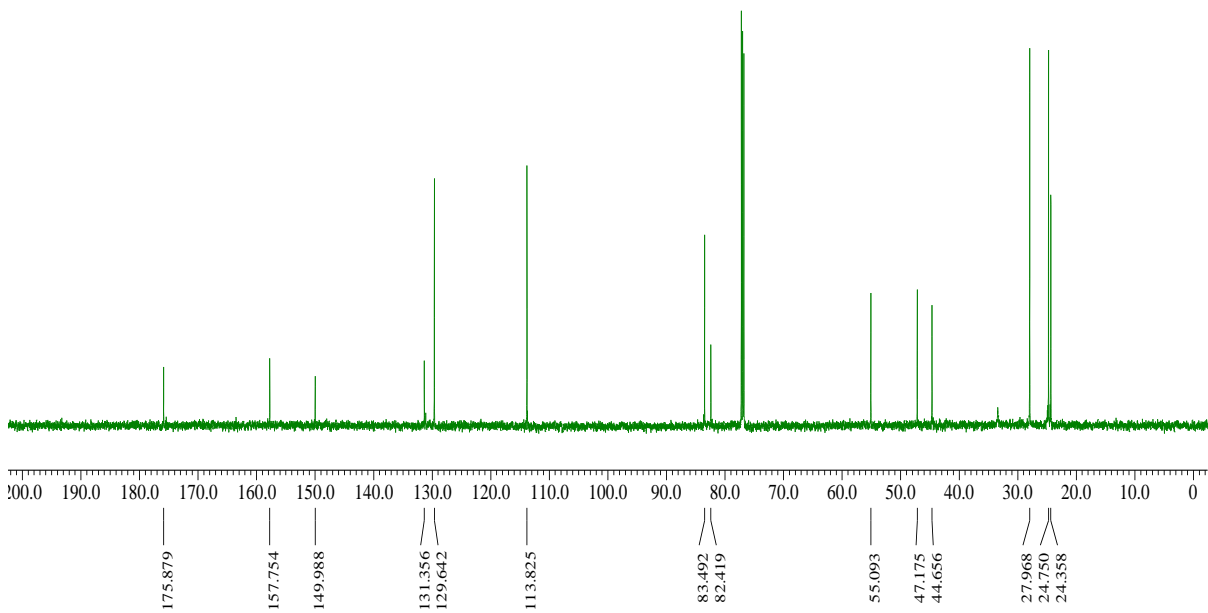

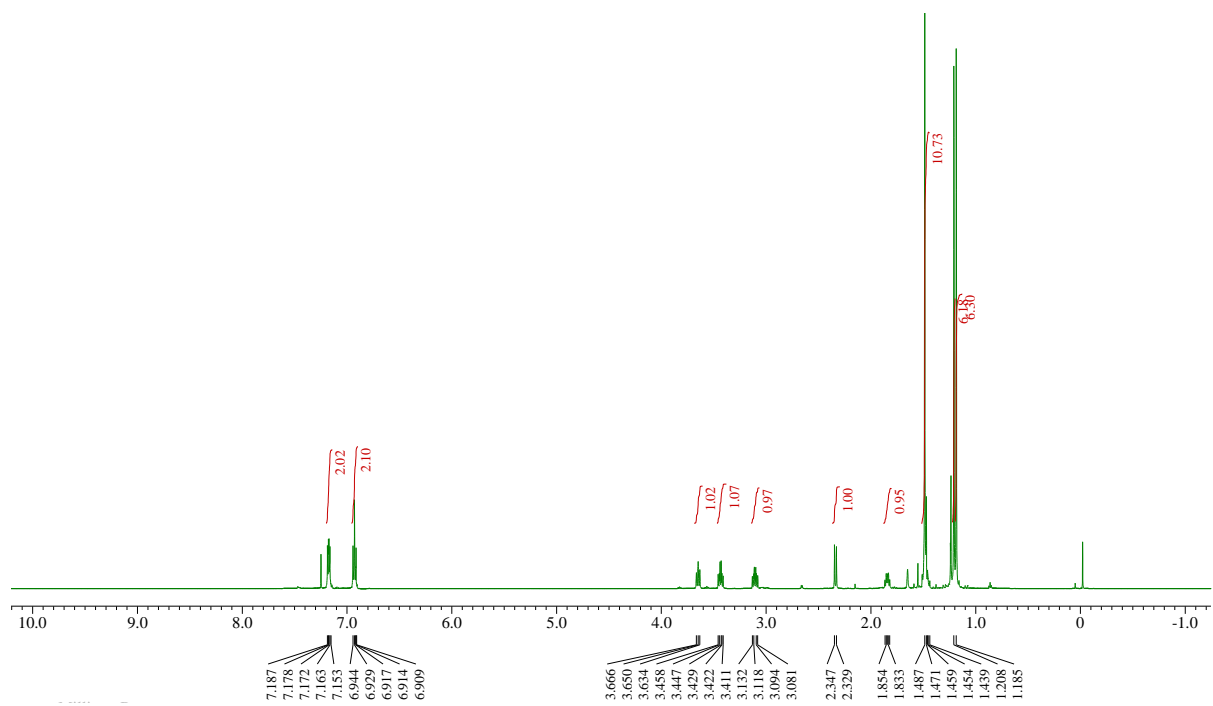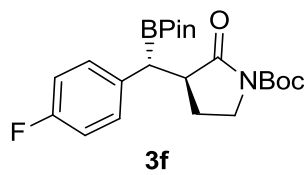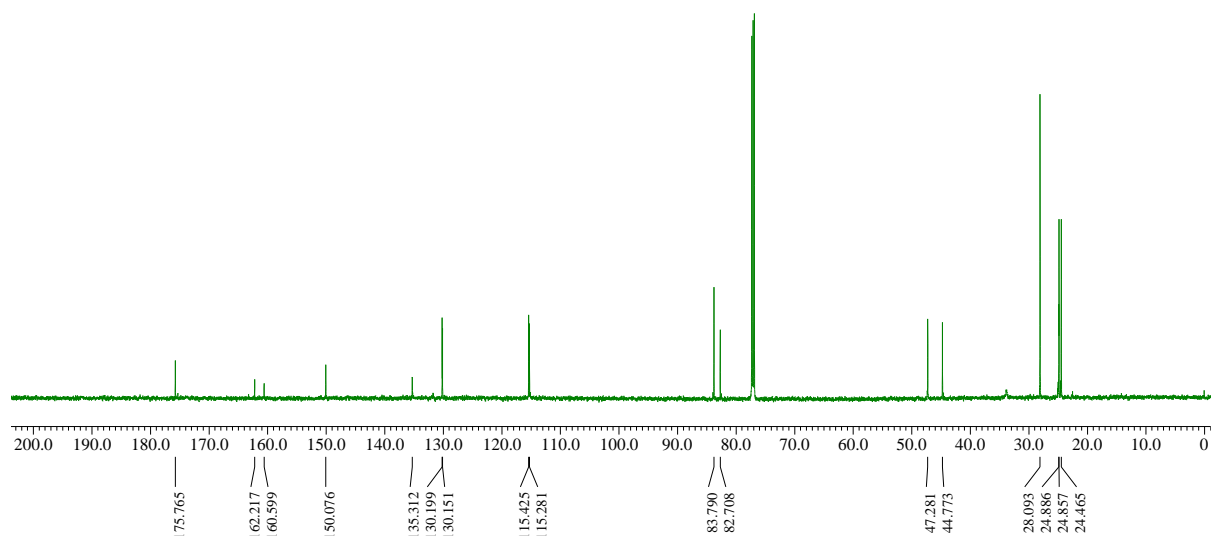

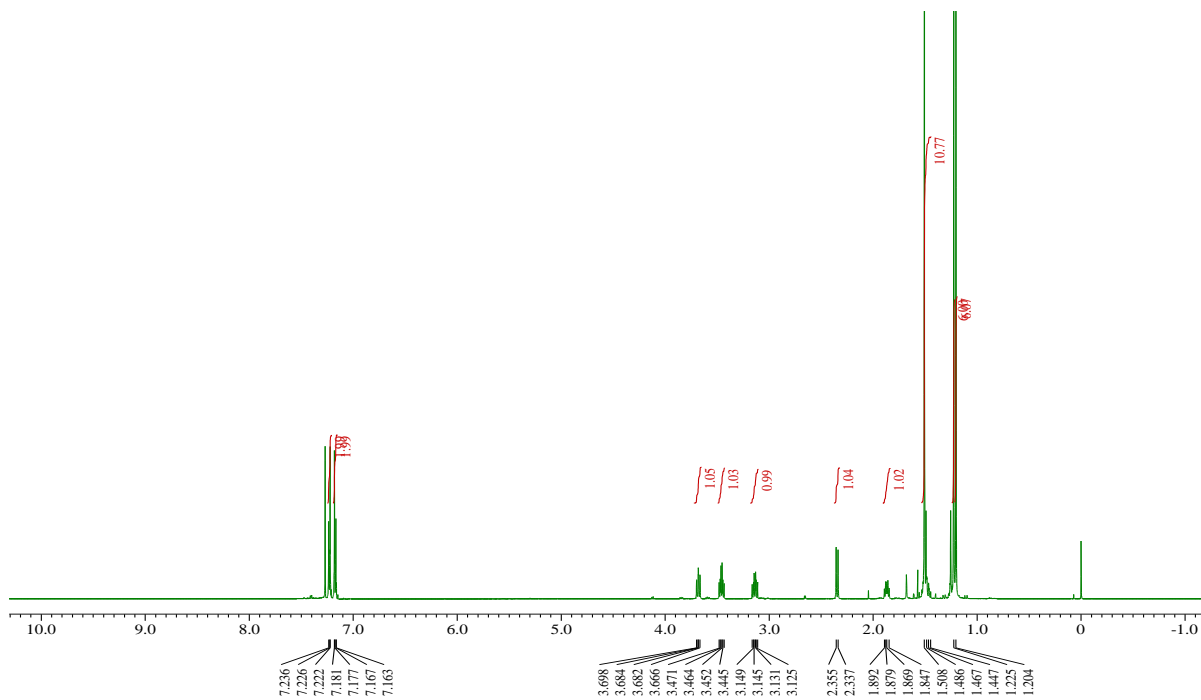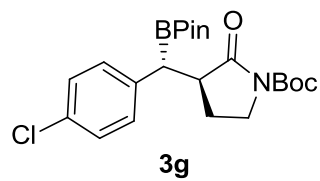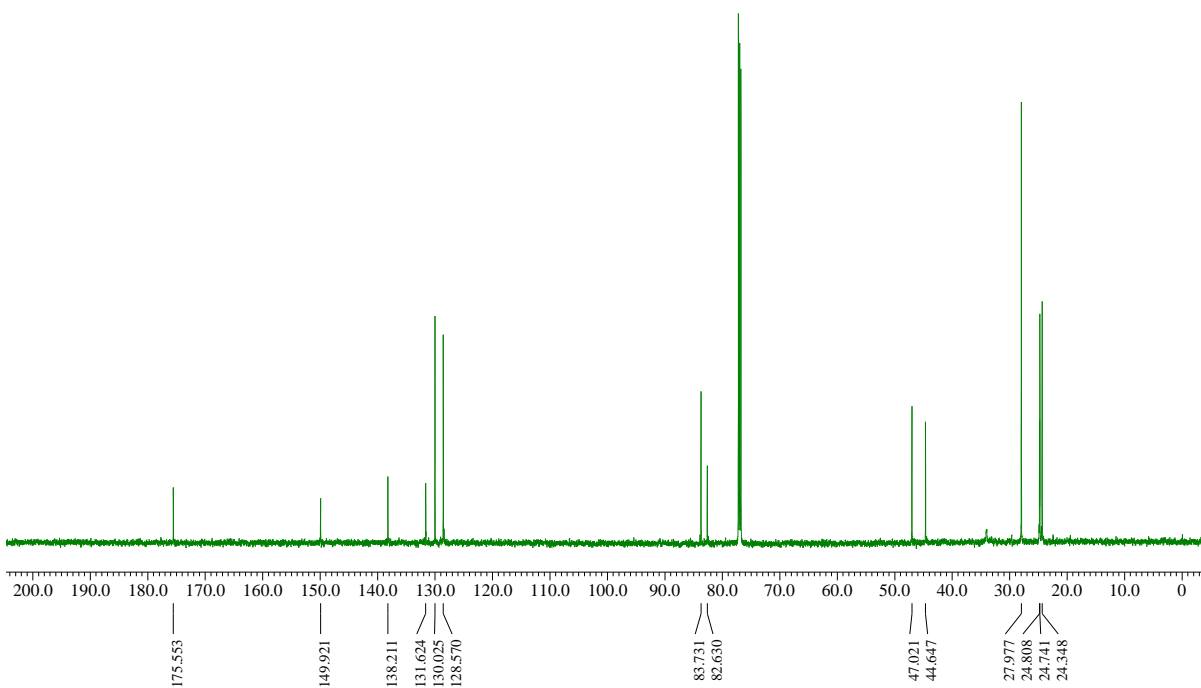



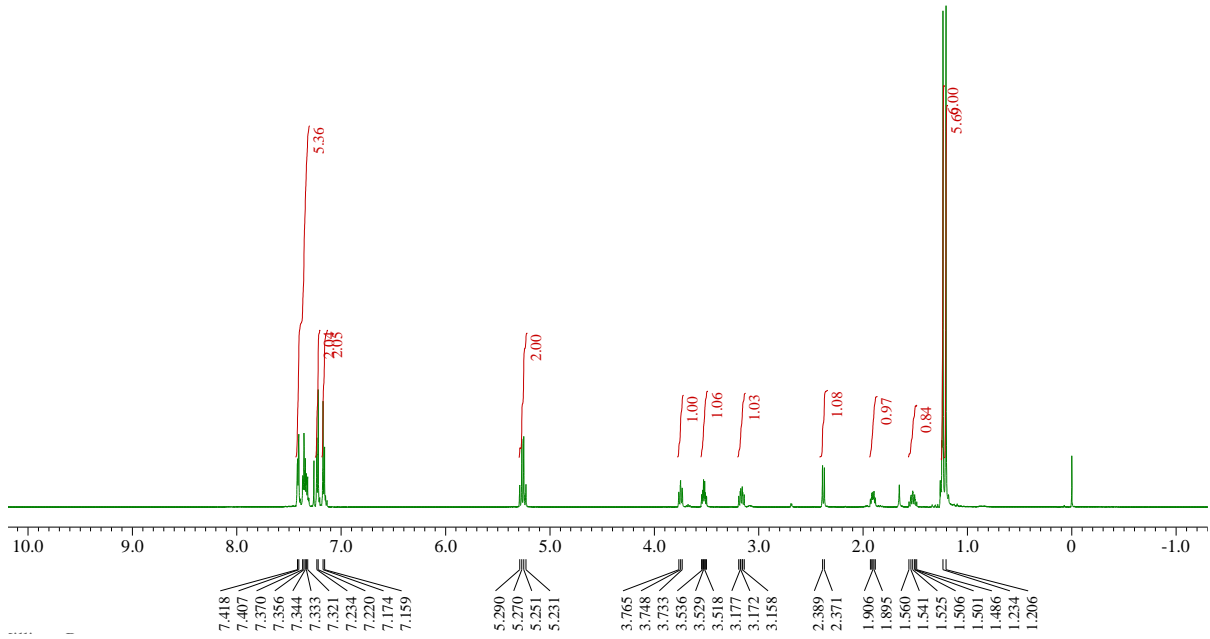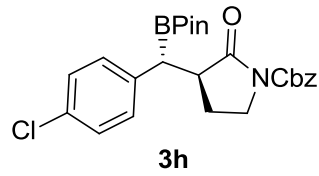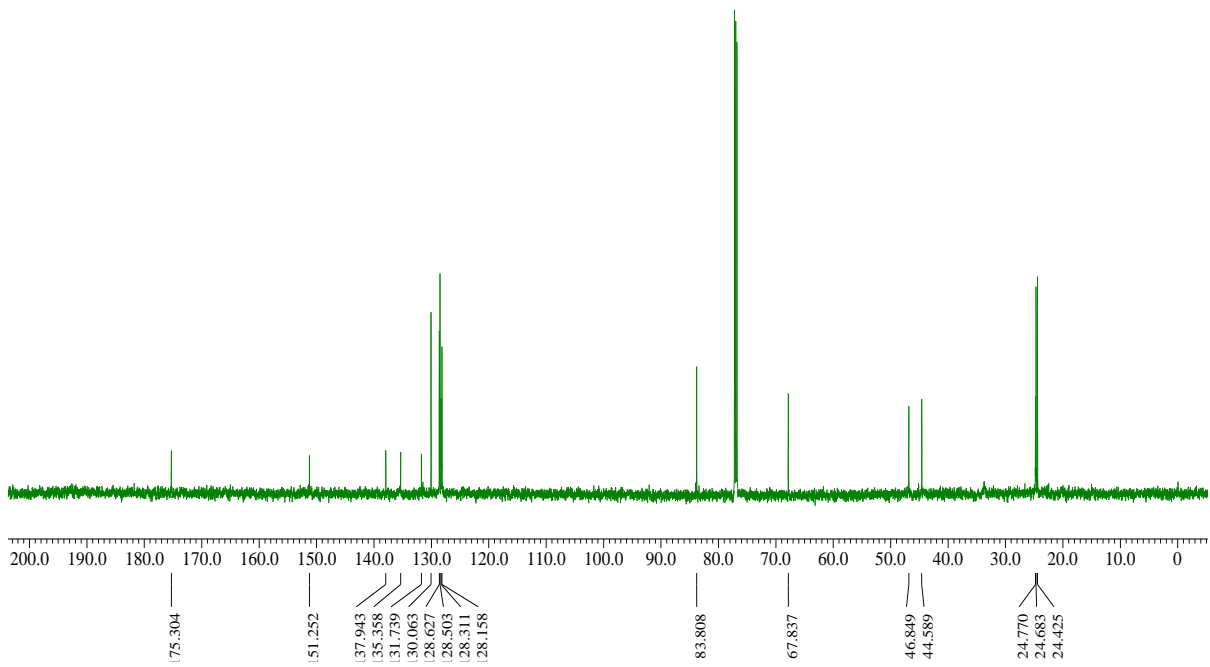

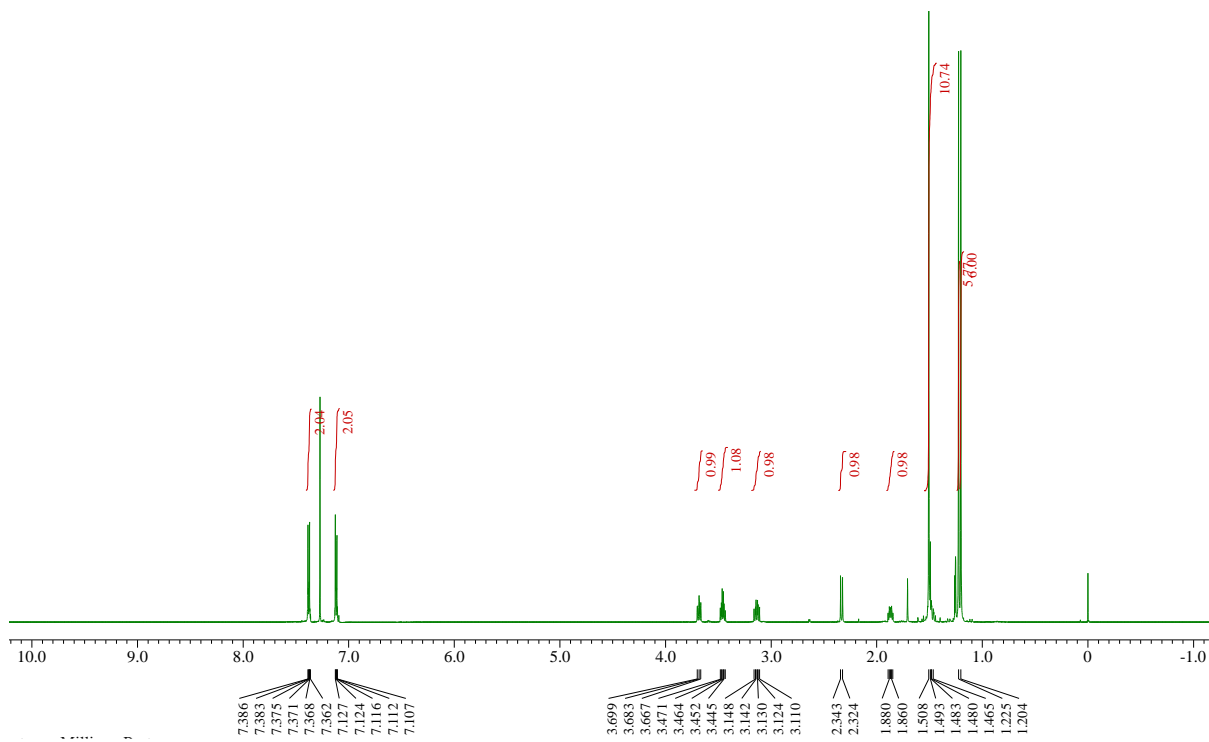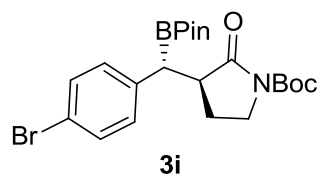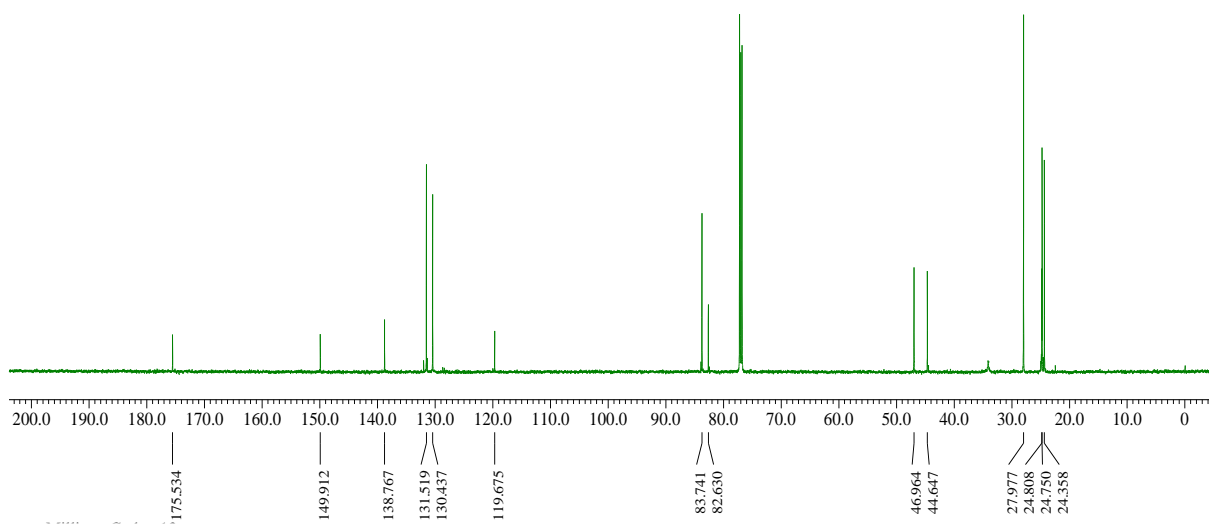

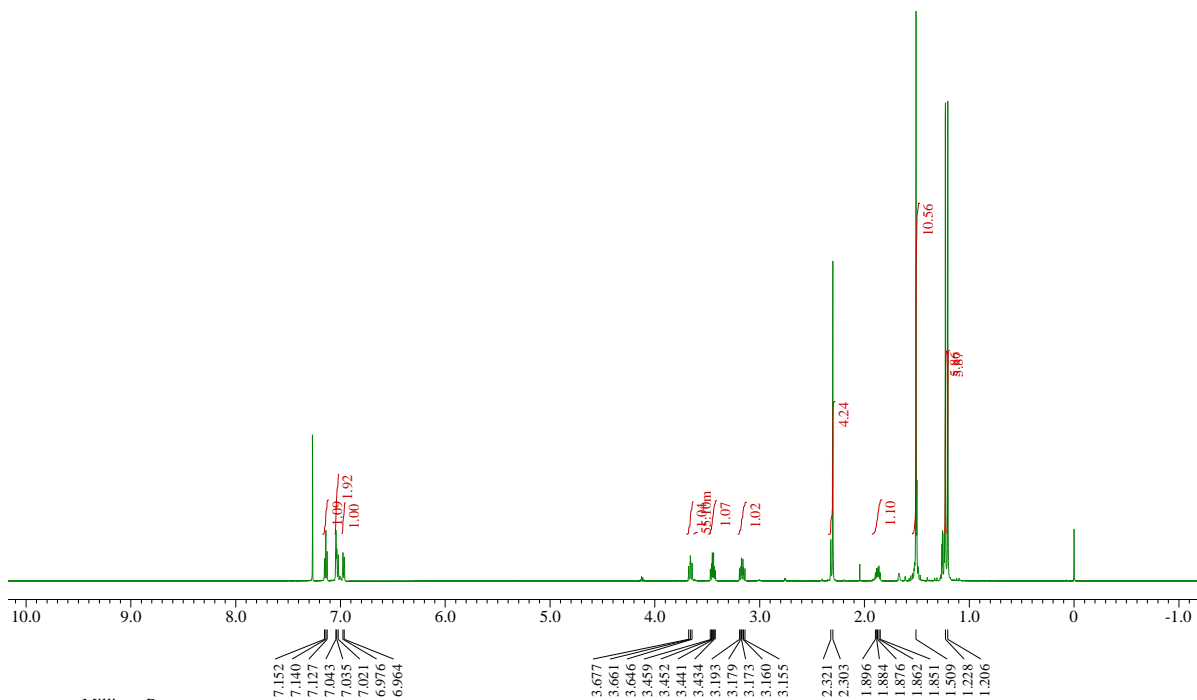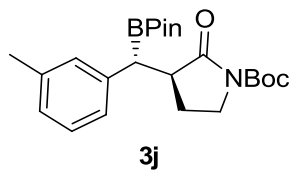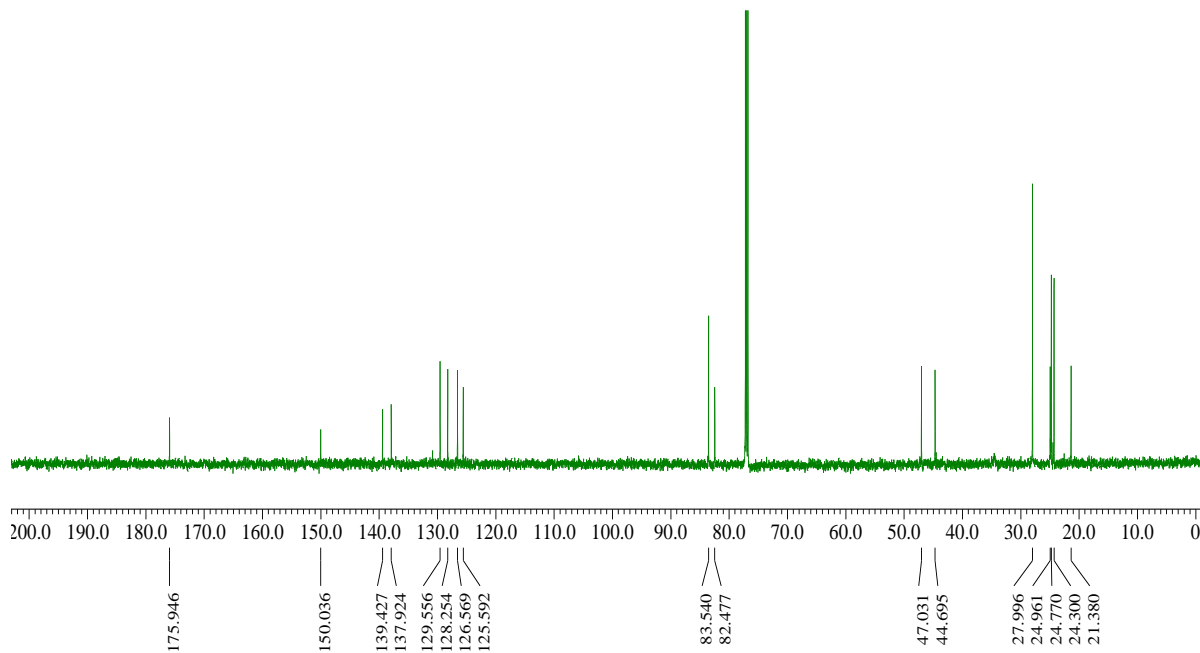

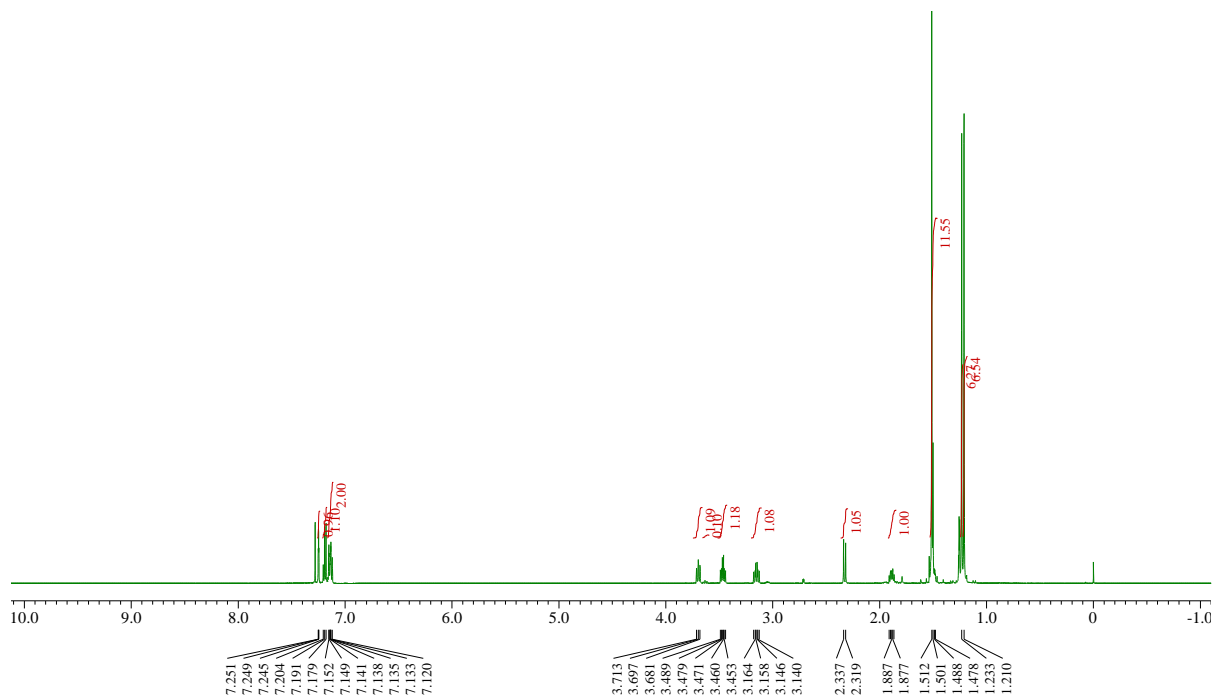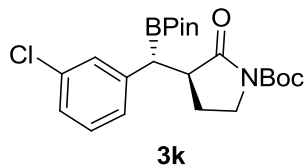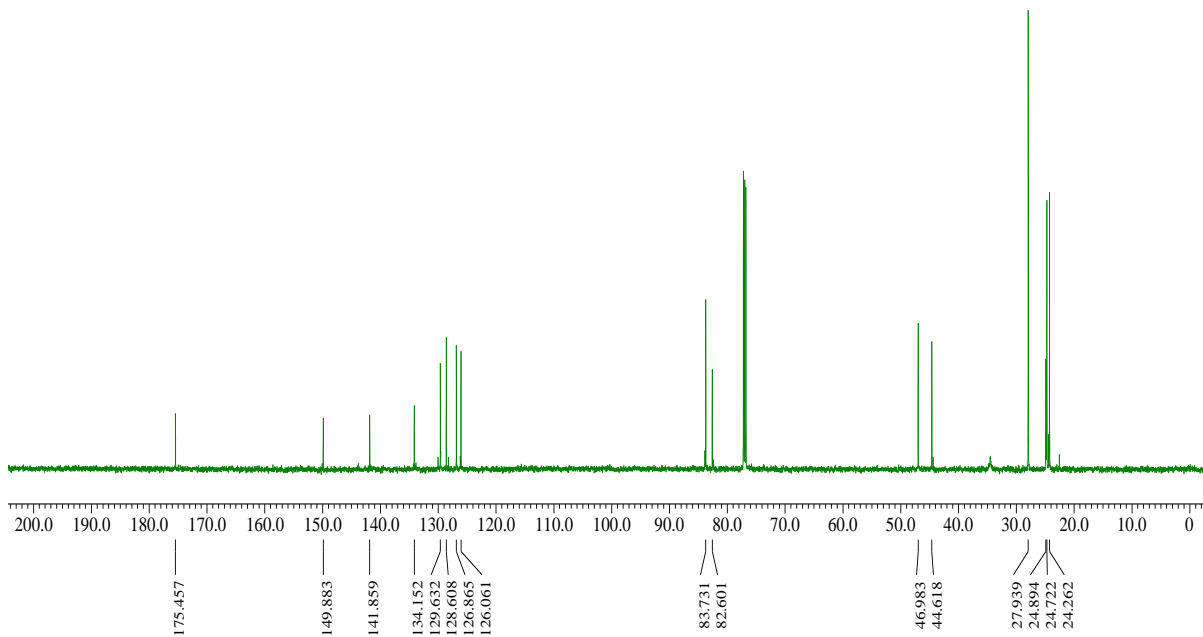

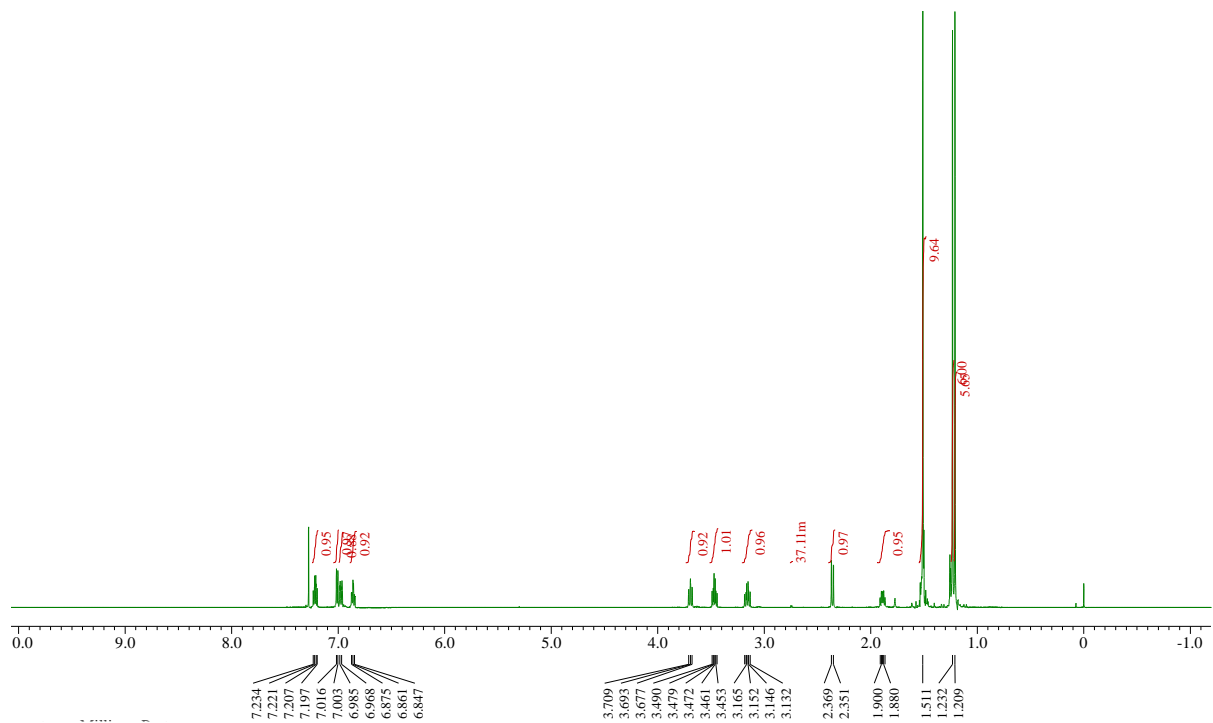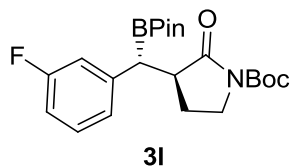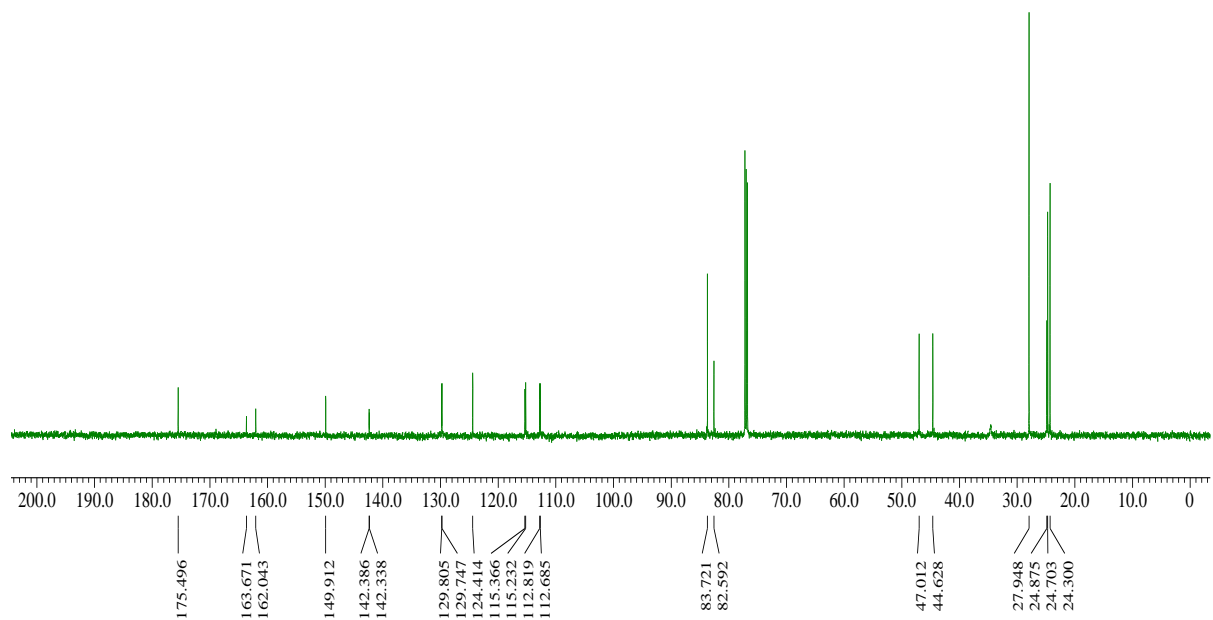

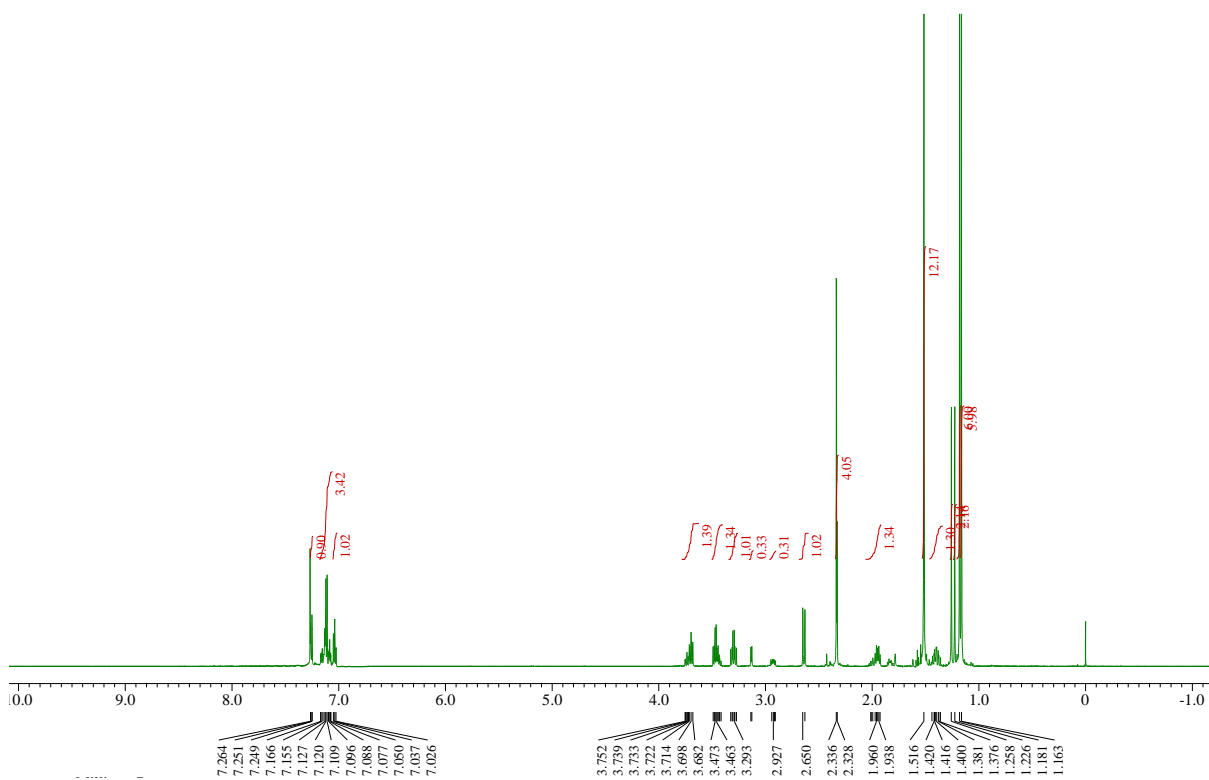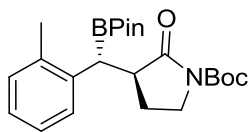

**3m**, dr 74:26

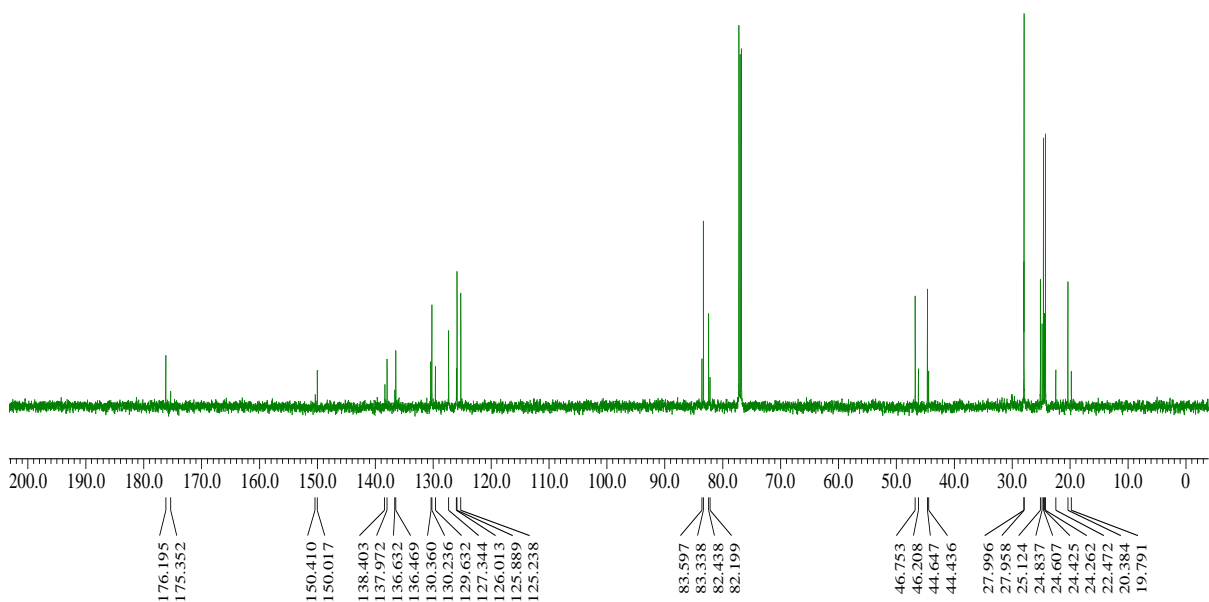

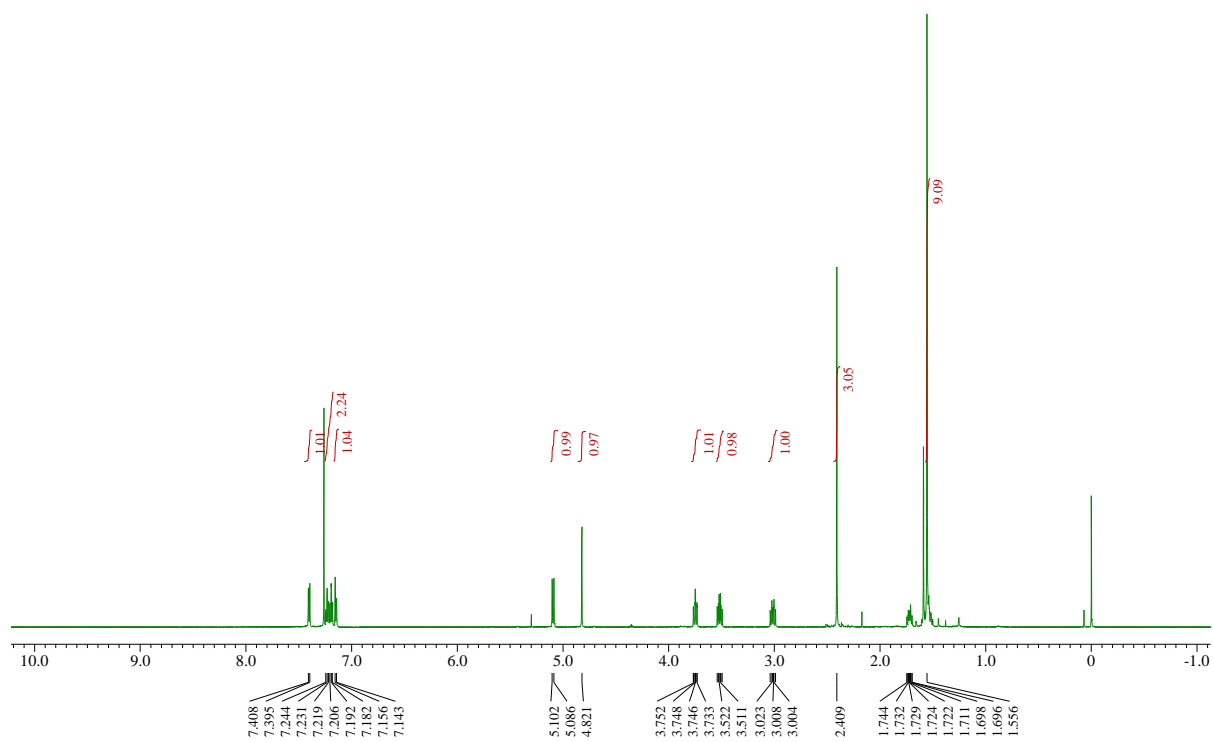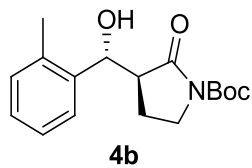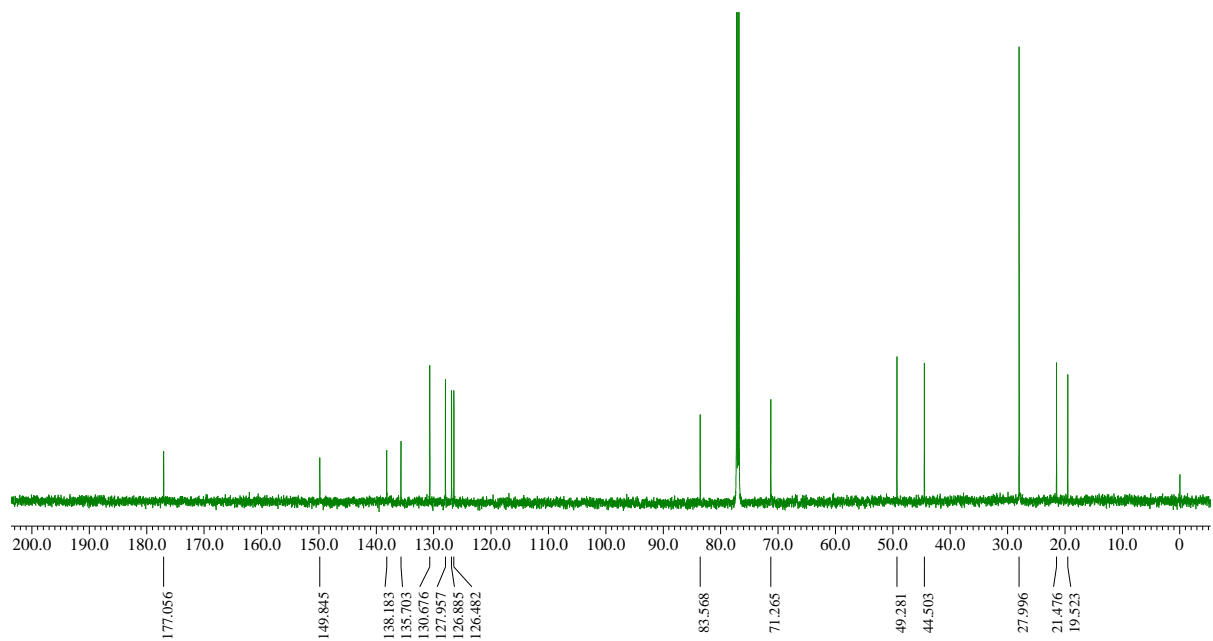

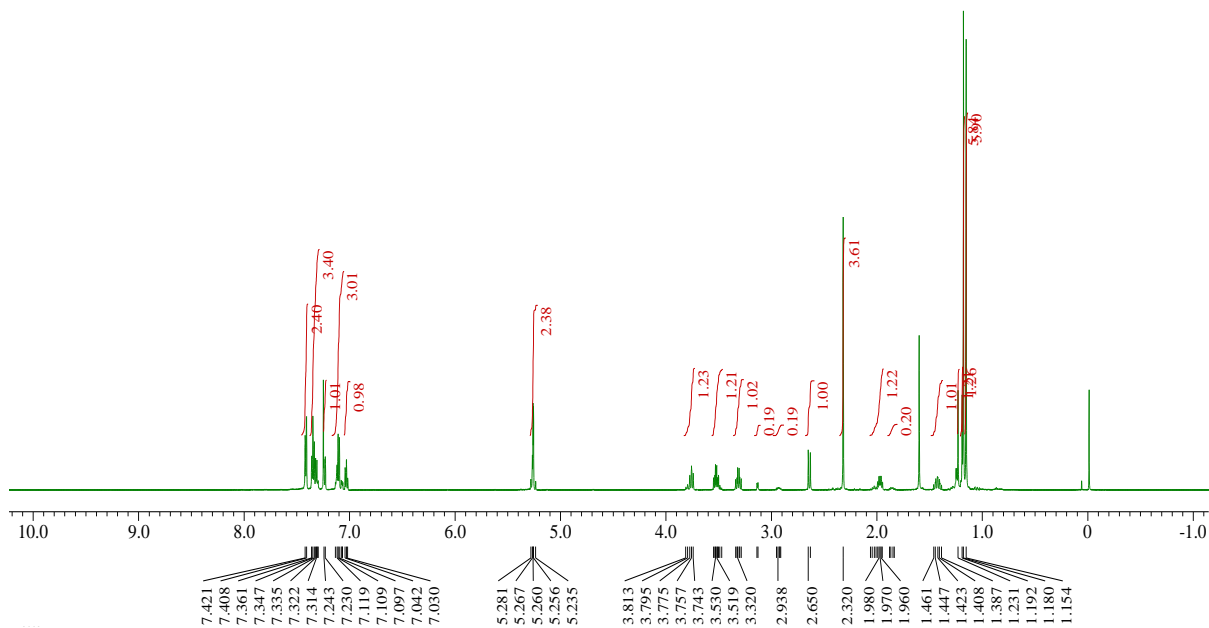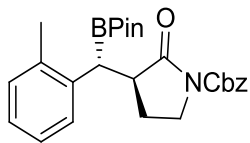

**3n**, dr 83:17

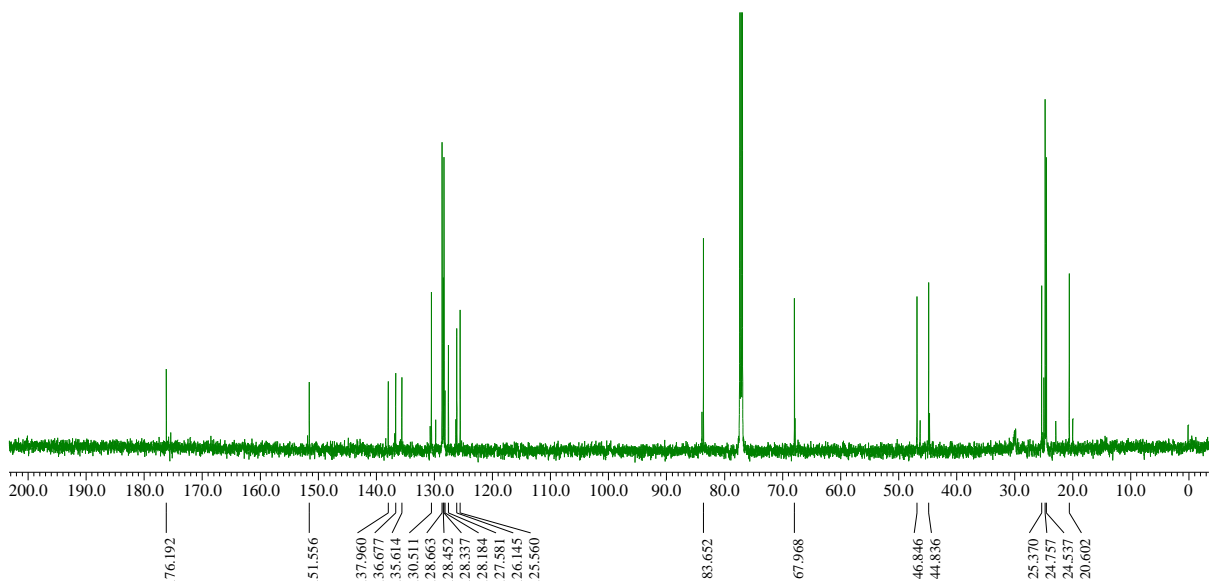



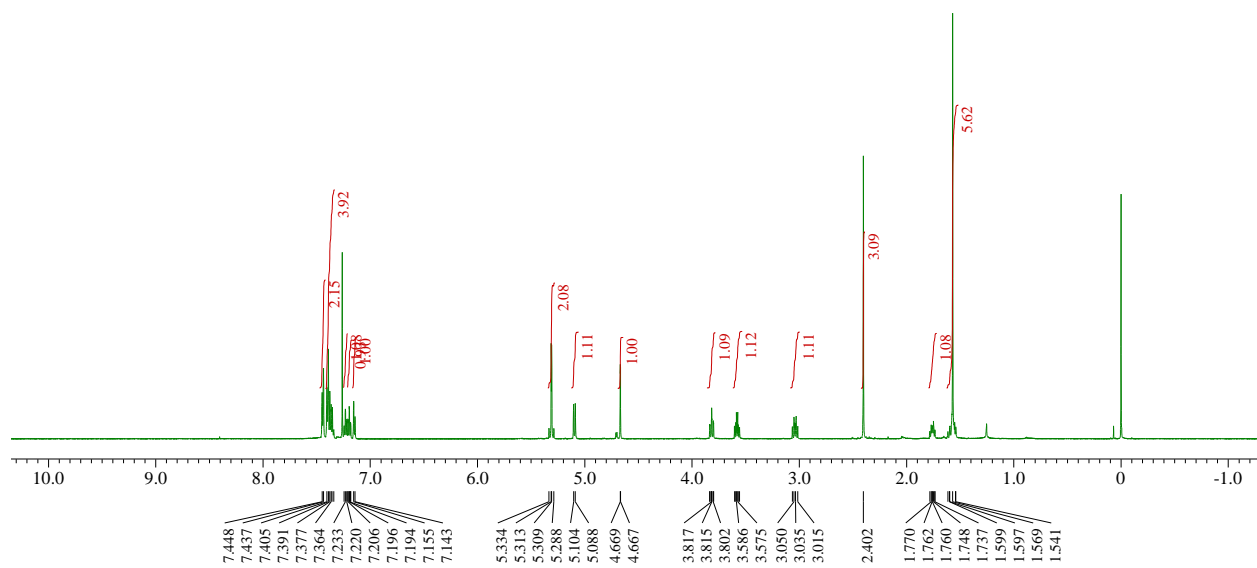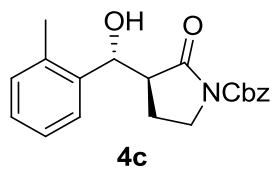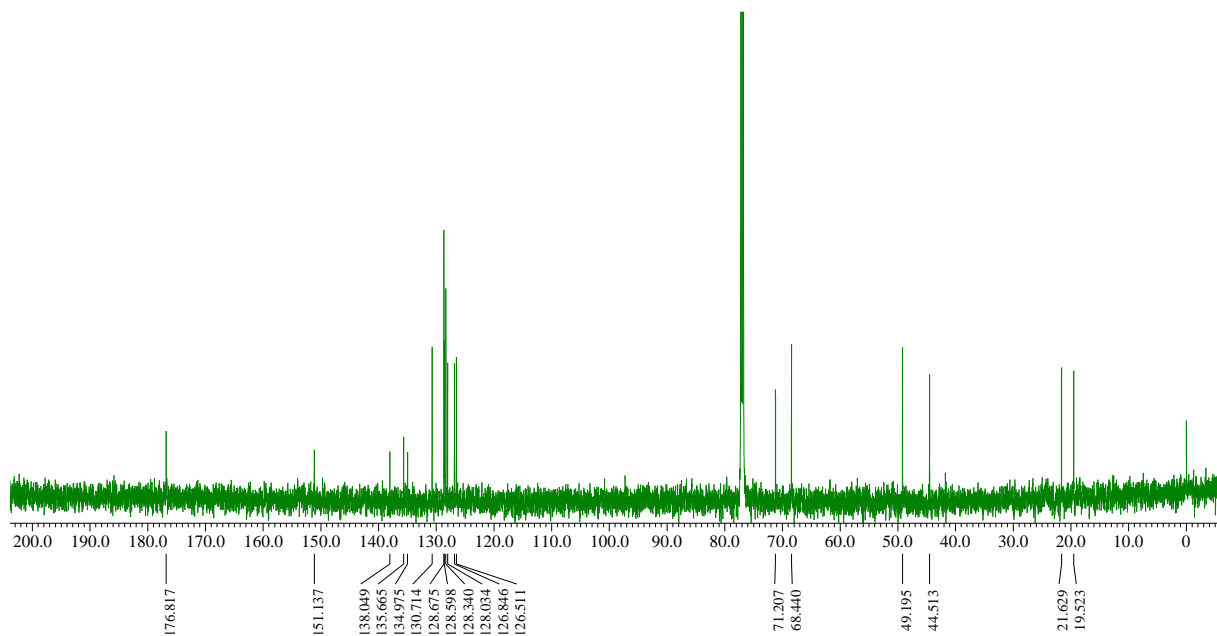

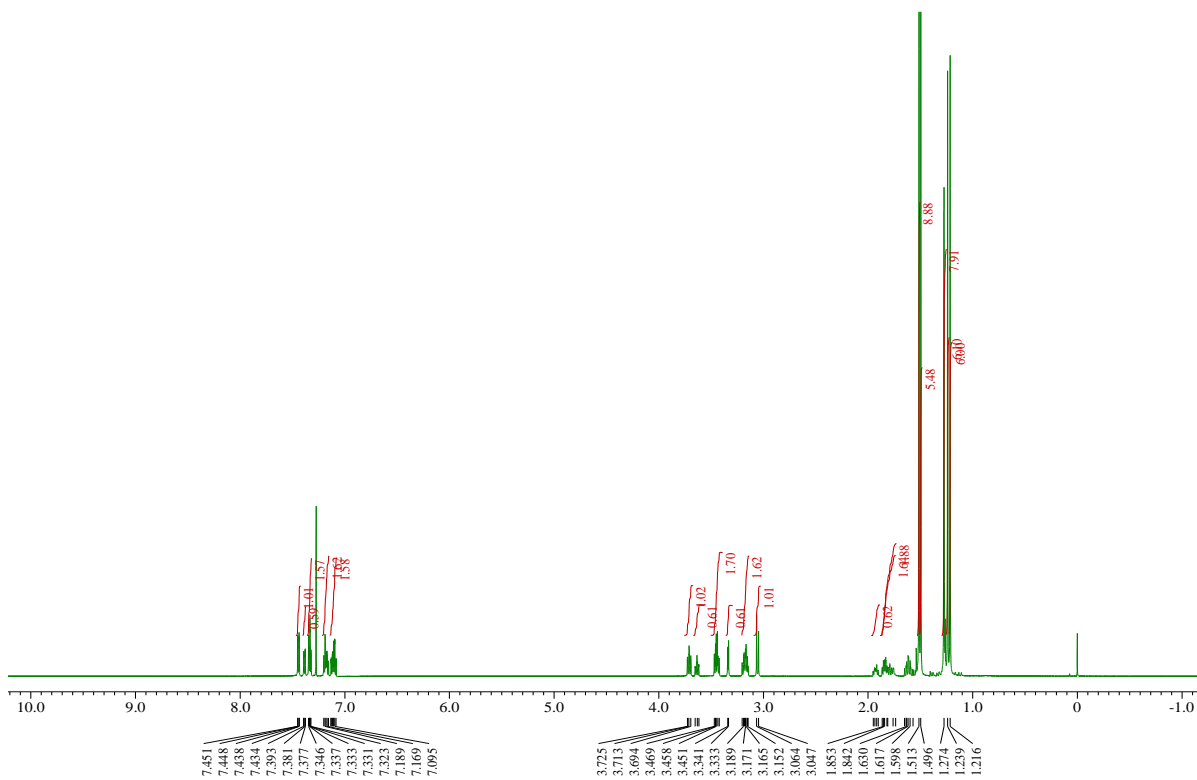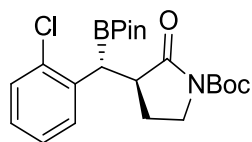

3o, dr 62:38

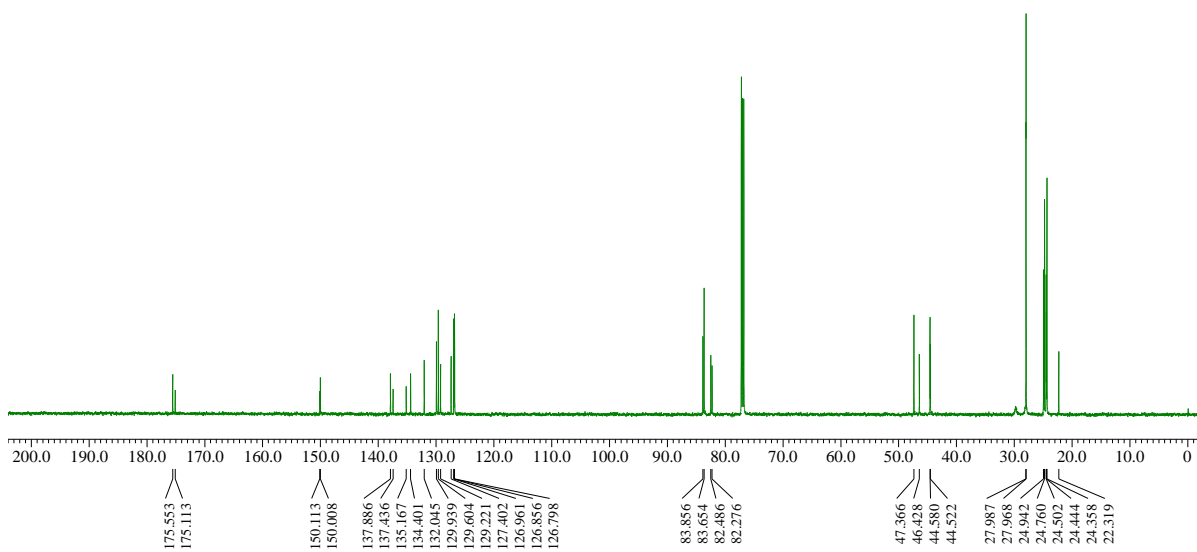

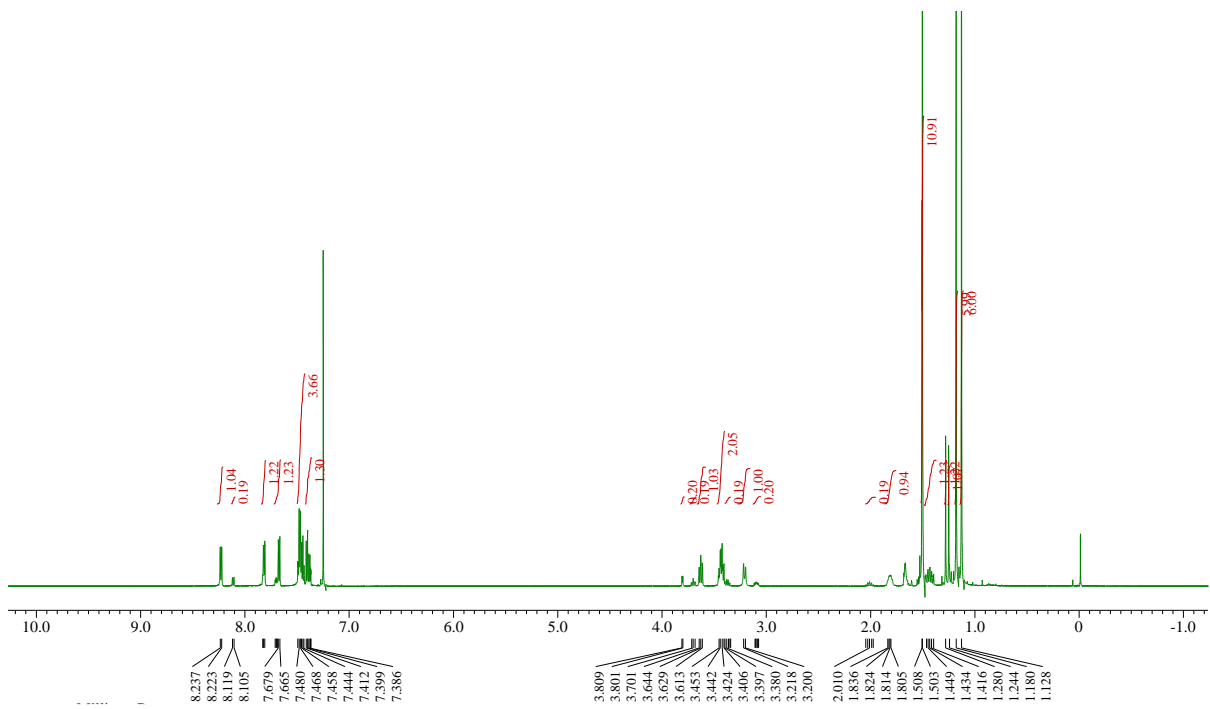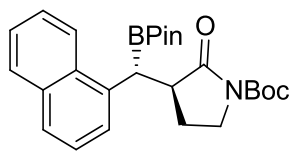

**3p**, dr 83:17

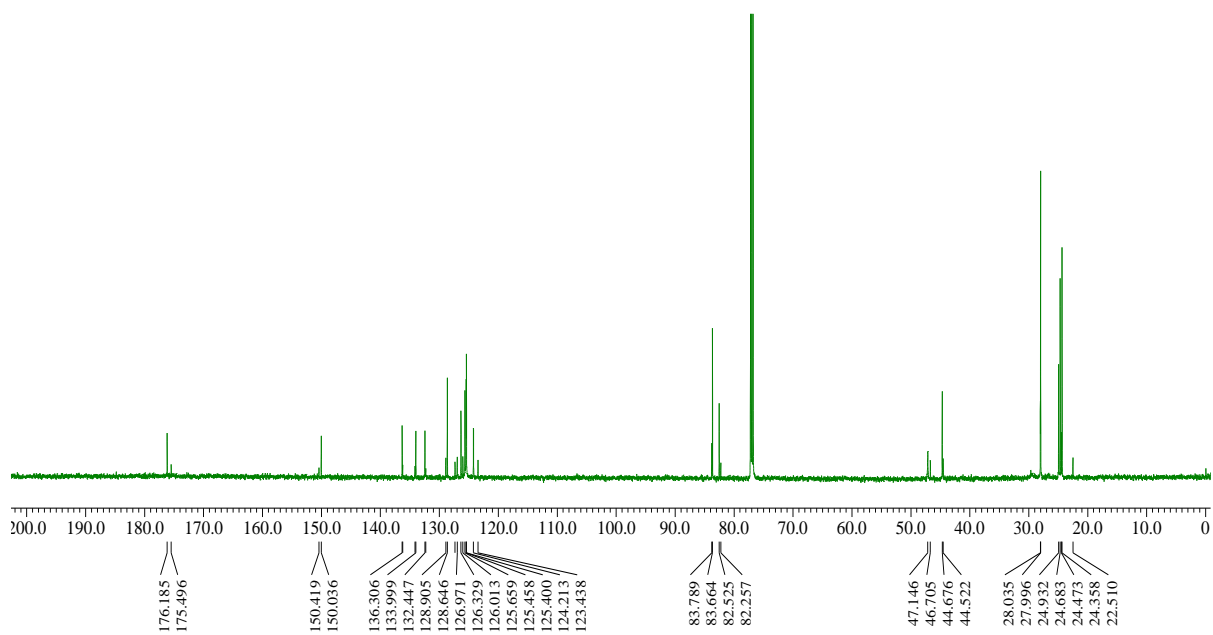

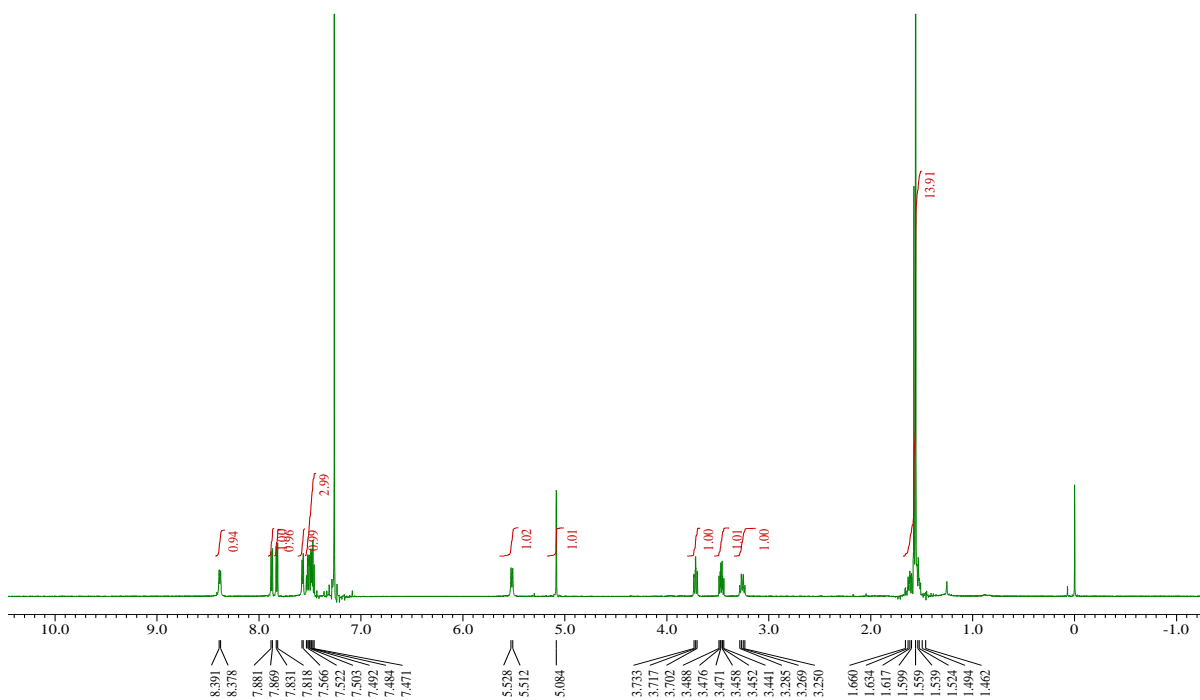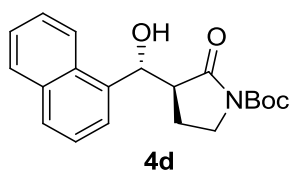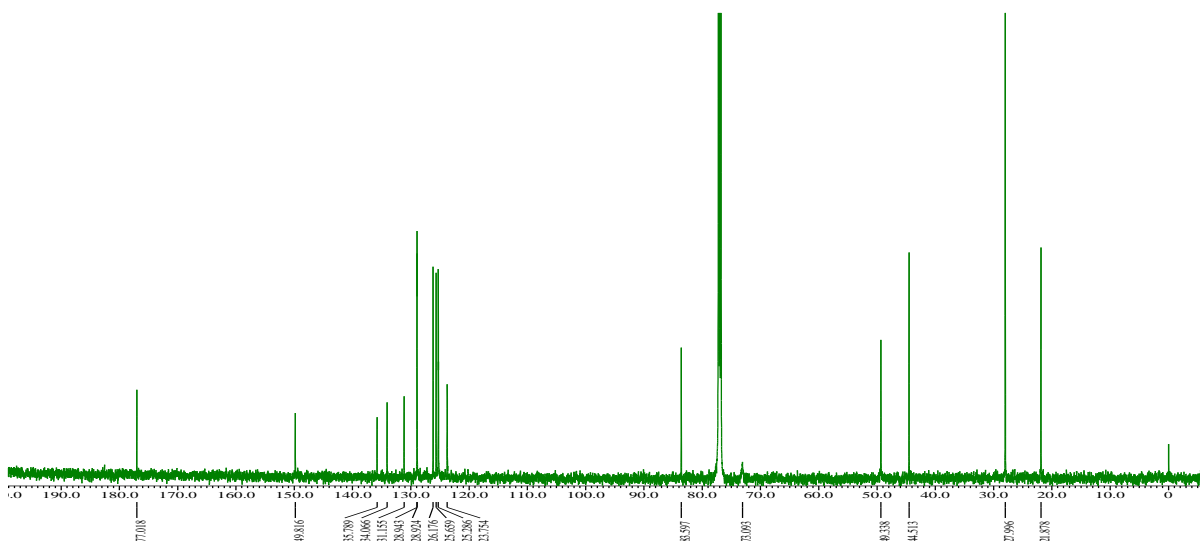

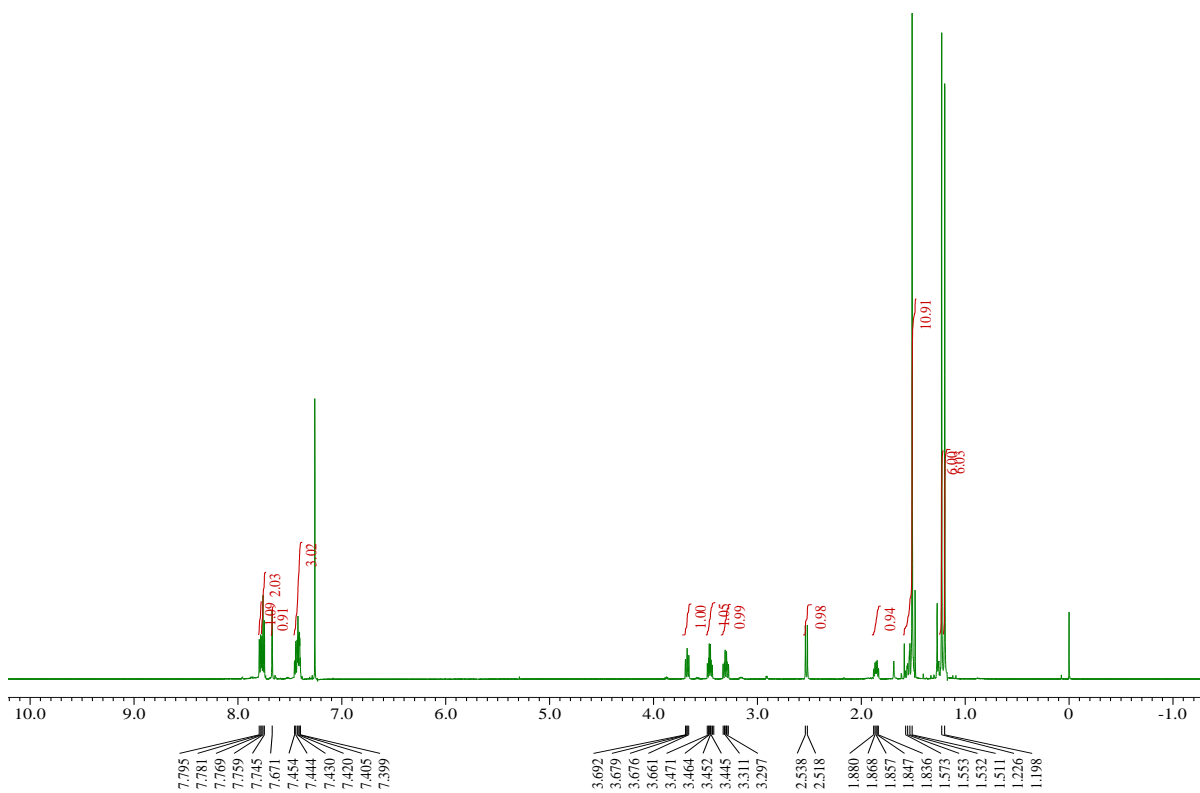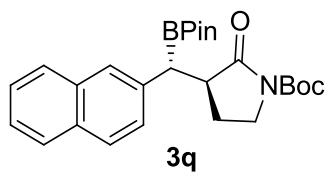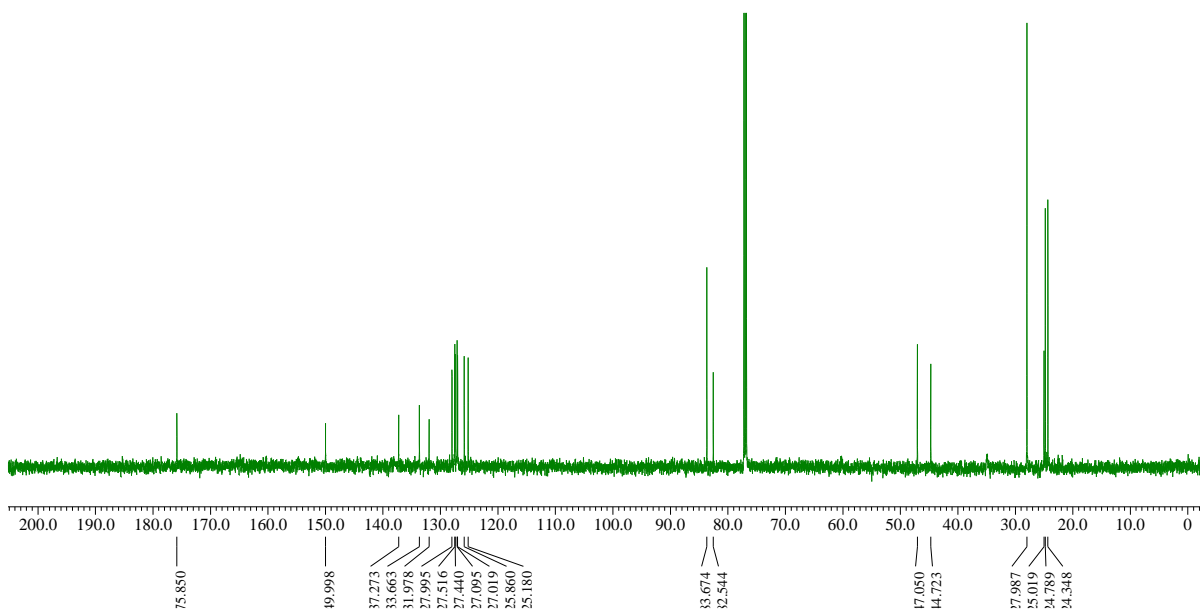

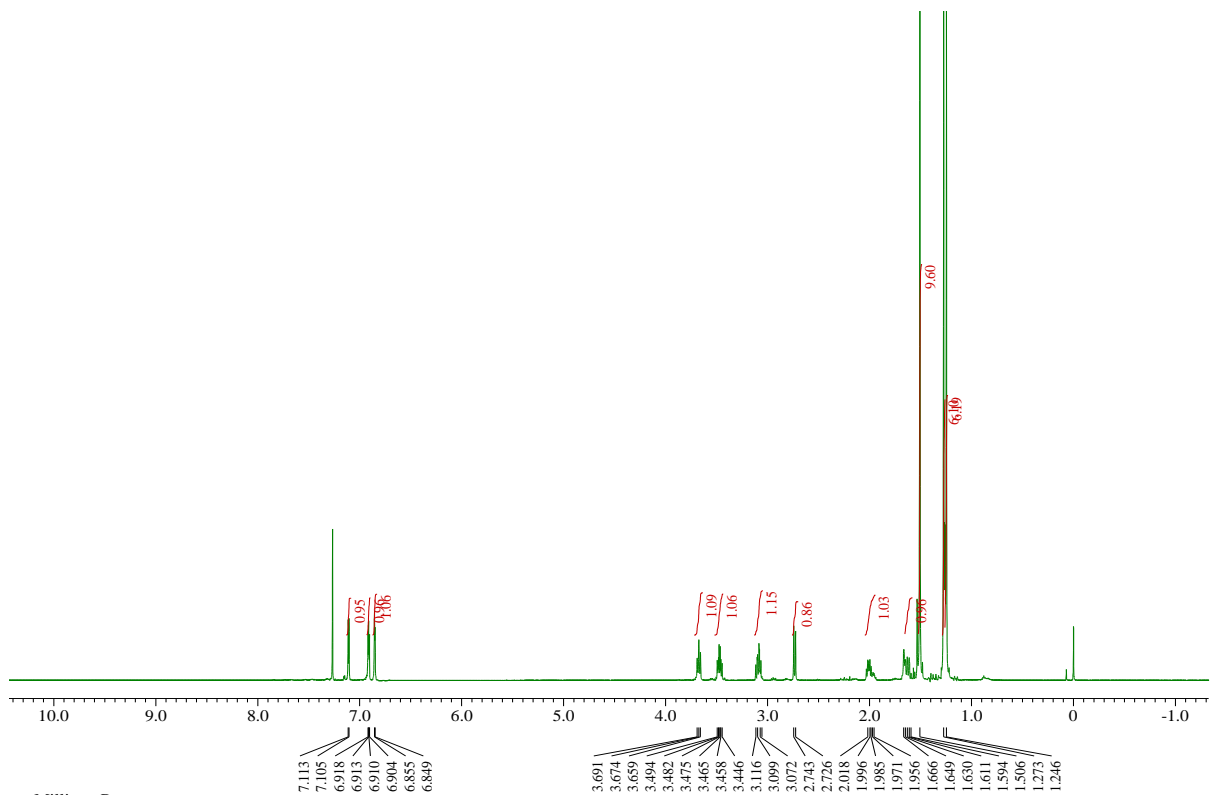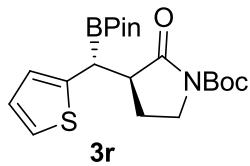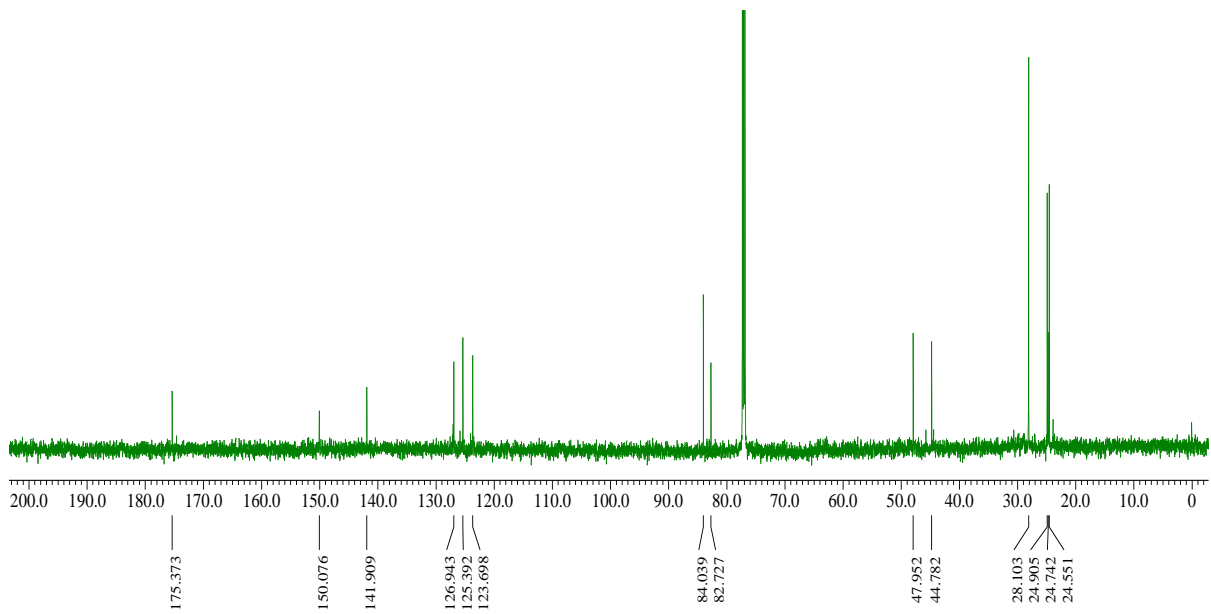

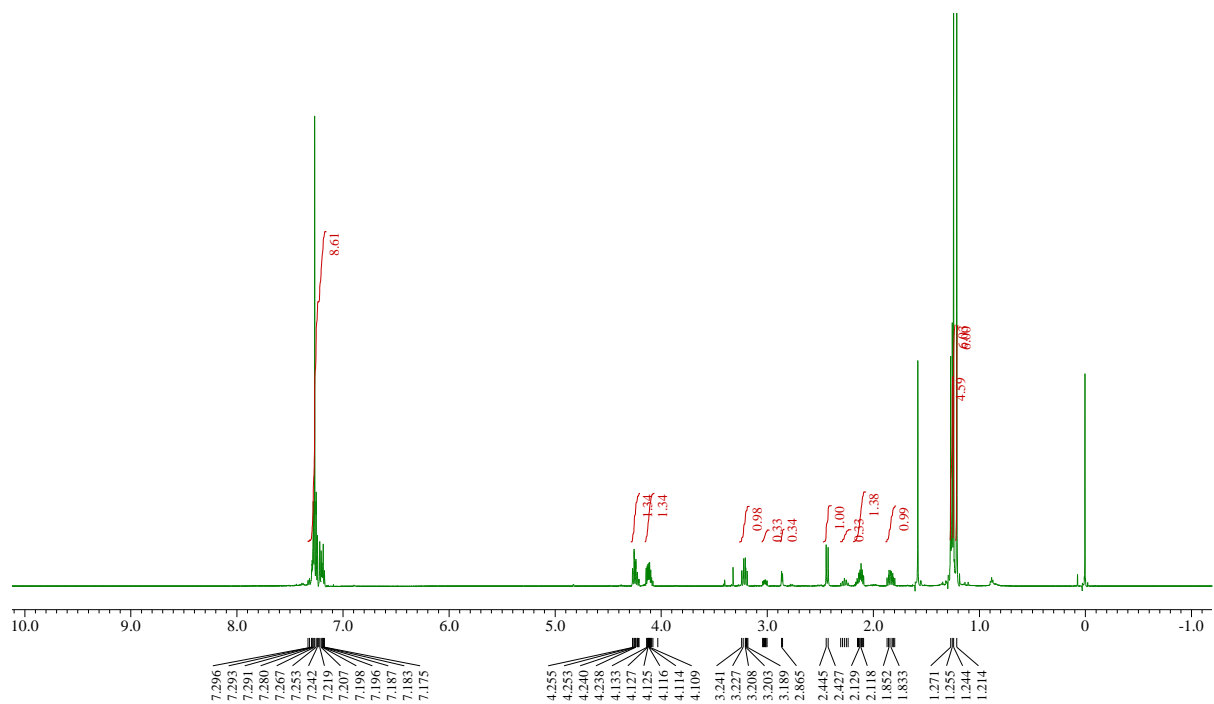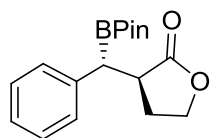

**3s,dr 76:24**

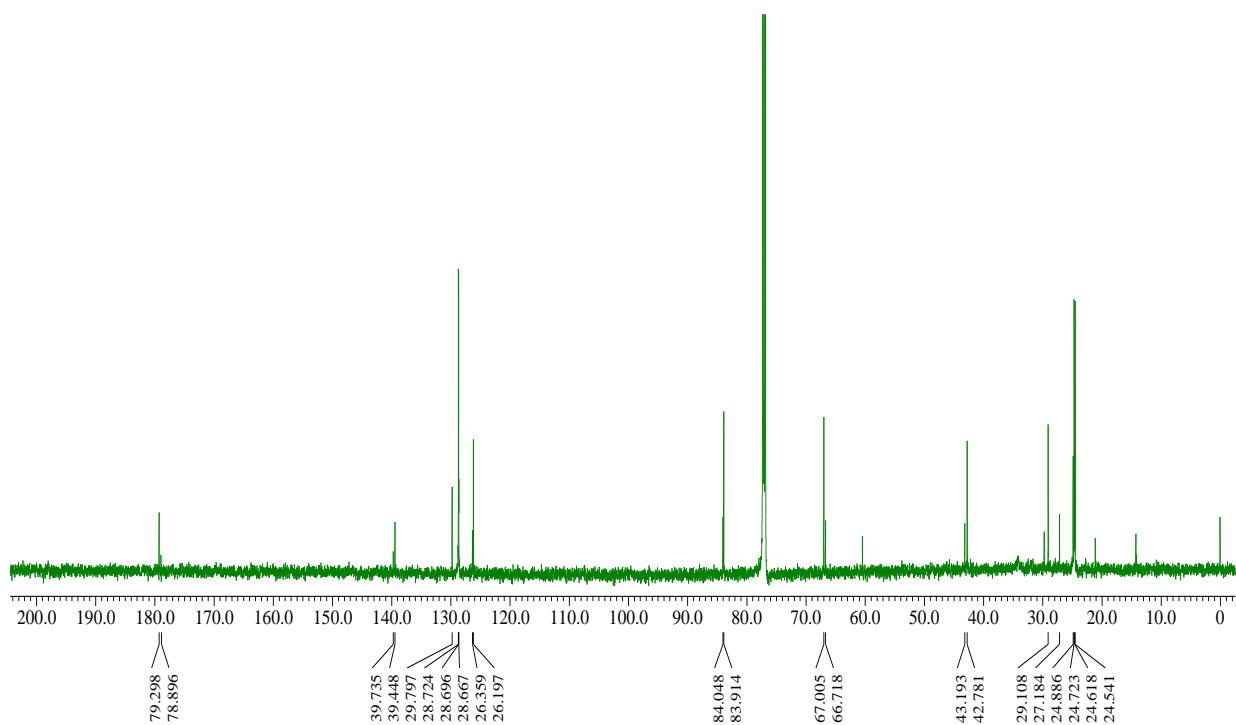

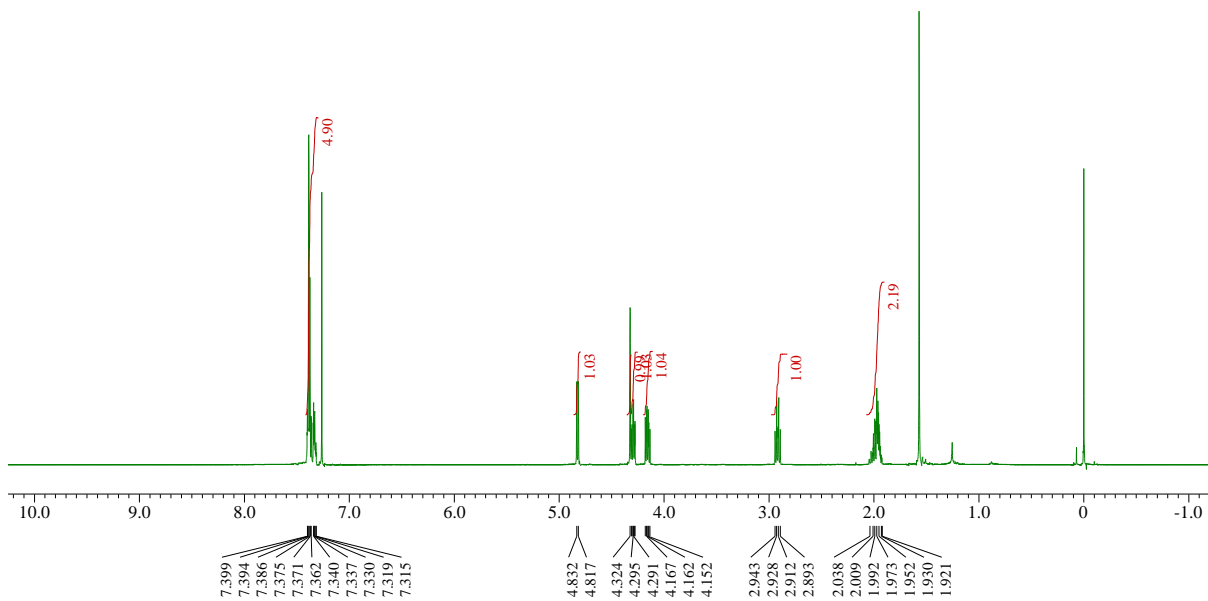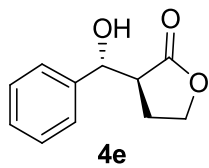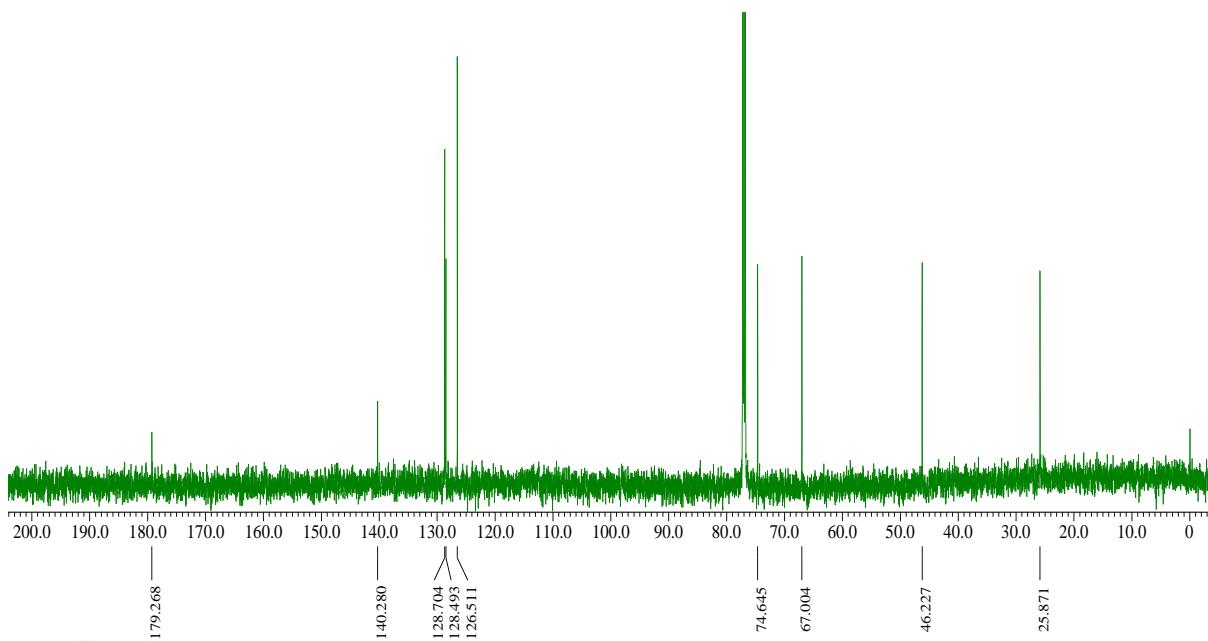



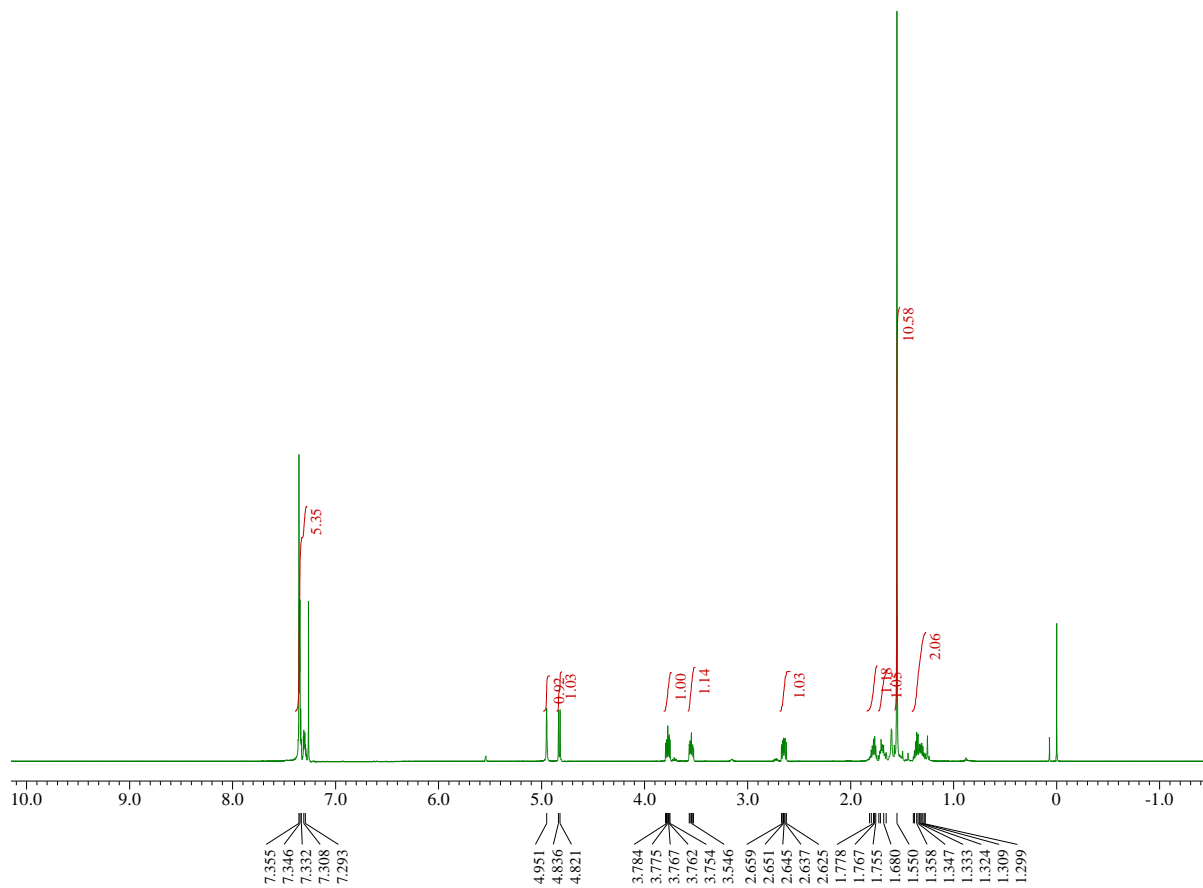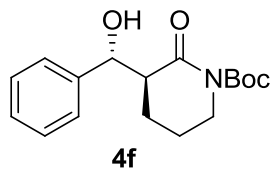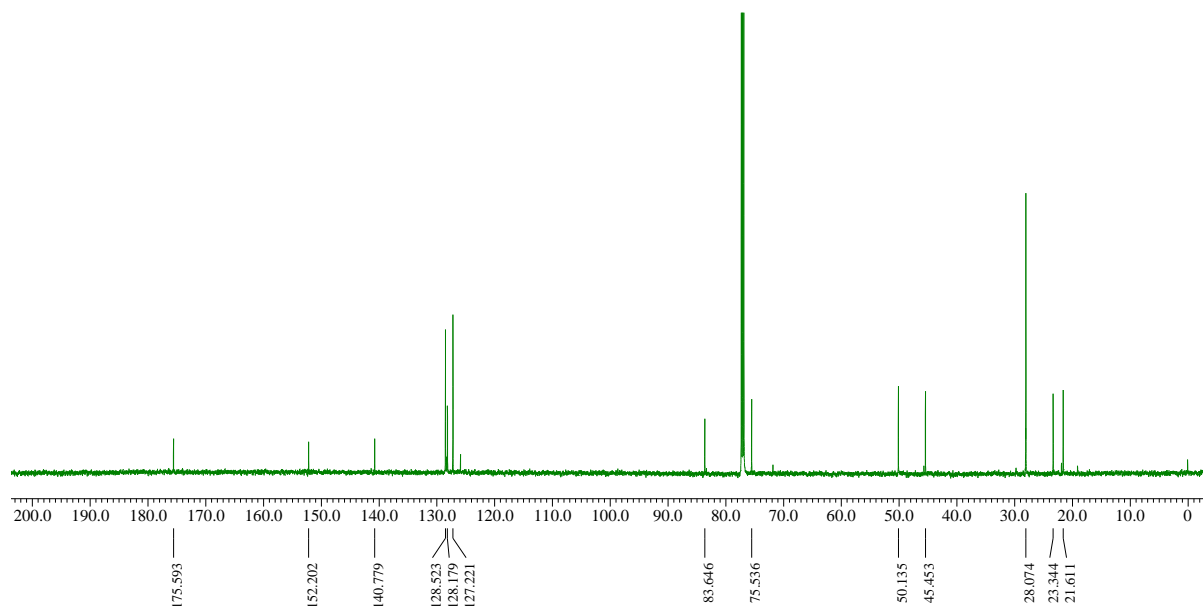

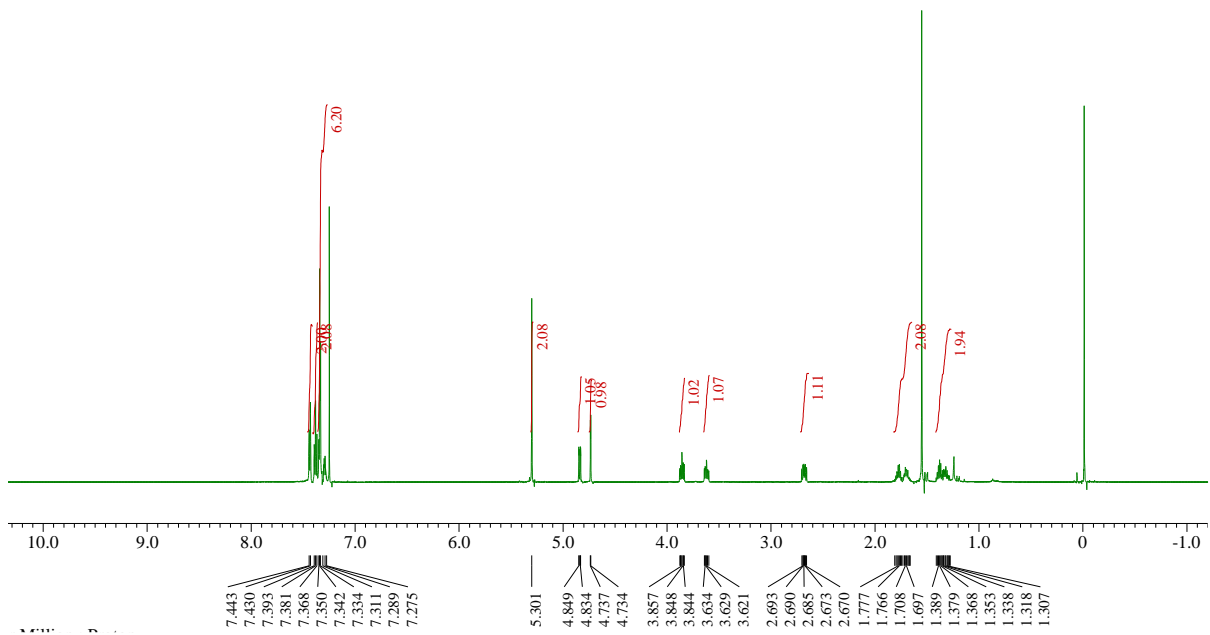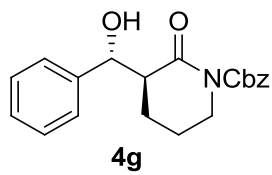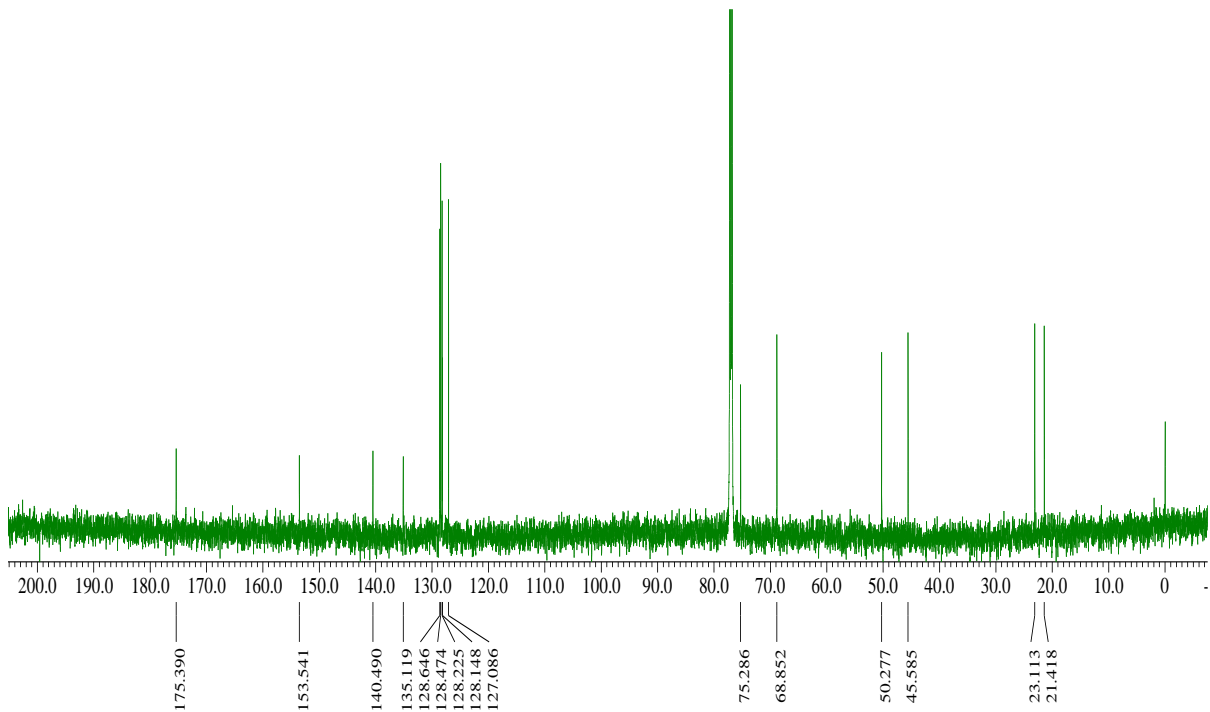

Supplement: c9qo01504c1.pdf [file c9qo01504c1.pdf]
